# Supplementary material
Source: PubMed Central journal article supplement (PMC9241098)
Supplement: mmc2.pdf [file mmc2.pdf]

## **Supplementary Materials**

**Supplementary Figure S1.** Graphical schema representing the populations of interest and the screening strategy used to identify epigenetic biomarkers of MIS-C.

**Supplementary Figure S2.** Characteristic laboratory parameters of the MIS-C patients included in the study.

**Supplementary Figure S3.** EPIMISC performance in the discovery cohort.

**Supplementary Figure S4.** Heatmap of the discovery cohort samples, clustered by methylation beta values of the 33 CpGs defining the EPIMISC signature.

**Supplementary Figure S5.** EPIMISC performance in the validation cohort.

**Supplementary Figure S6.** Heatmap of the validation cohort samples, clustered by methylation beta values of the 33 CpGs defining the EPIMISC signature.

**Supplementary Figure S7.** EPIMISC performance in the entire cohort.

**Supplementary Table S1.** Characteristics of the pediatric COVID-19 patients with IgG and/or PCR positive status for SARS-CoV-2, but without MIS-C.

**Supplementary Table S2.** Characteristics of the children and adolescent control donors collected during the pre-COVID-19 period.

**Supplementary Table S3.** Description of the 33 CpG sites with a differential DNA methylation status between the MIS-C and non-MIS-C in the discovery cohort, according to the study pipeline described in Supplementary Figure S1.

**Supplementary Table S4.** Description of the 1337 CpG sites in the 47 genes related to COVID-19, based on published studies.

**Supplementary Table S5.** Description of the 68 CpG sites in the 3 genes related to MIS-C, based on published studies.

**Supplementary Table S6.** EPIMISC derived-CpGs in the validation and entire cohorts, according to the study pipeline described in Supplementary Figure S1.

**Supplementary Table S7.** Description of the 1350 CpG sites in the 33 genes related to Kawasaki disease, based on published studies.

**Supplementary Methods.** Study protocol and extended methods.

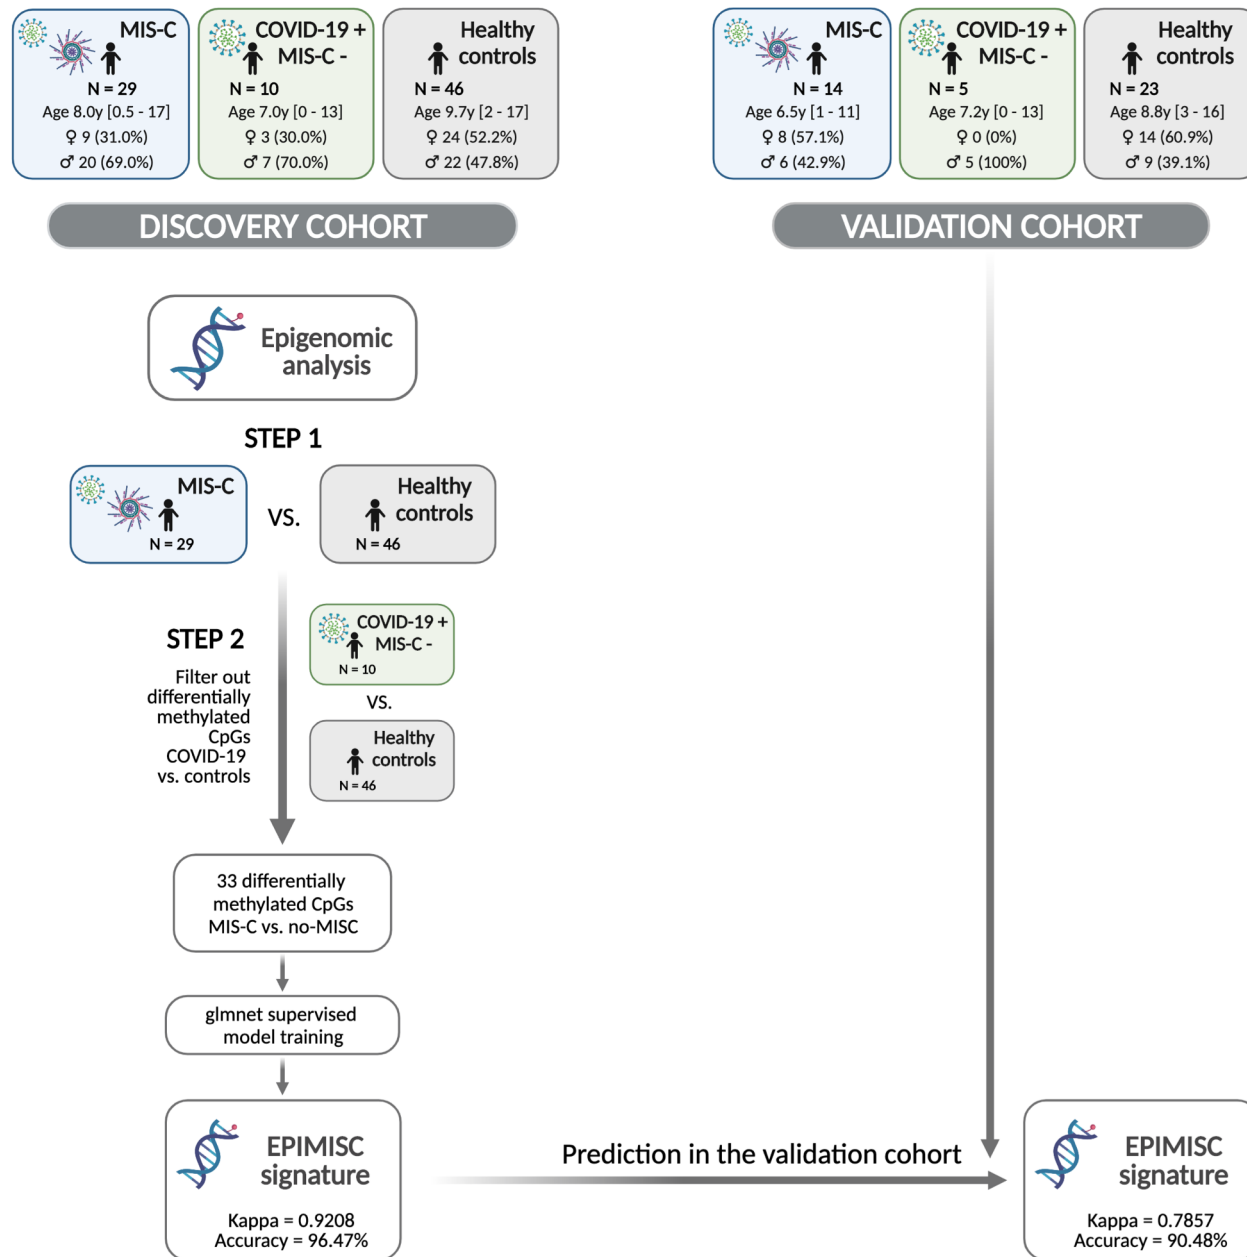

**Supplementary Figure S1.** Graphical schema representing the populations of interest and the screening strategy used to identify epigenetic biomarkers of MIS-C.

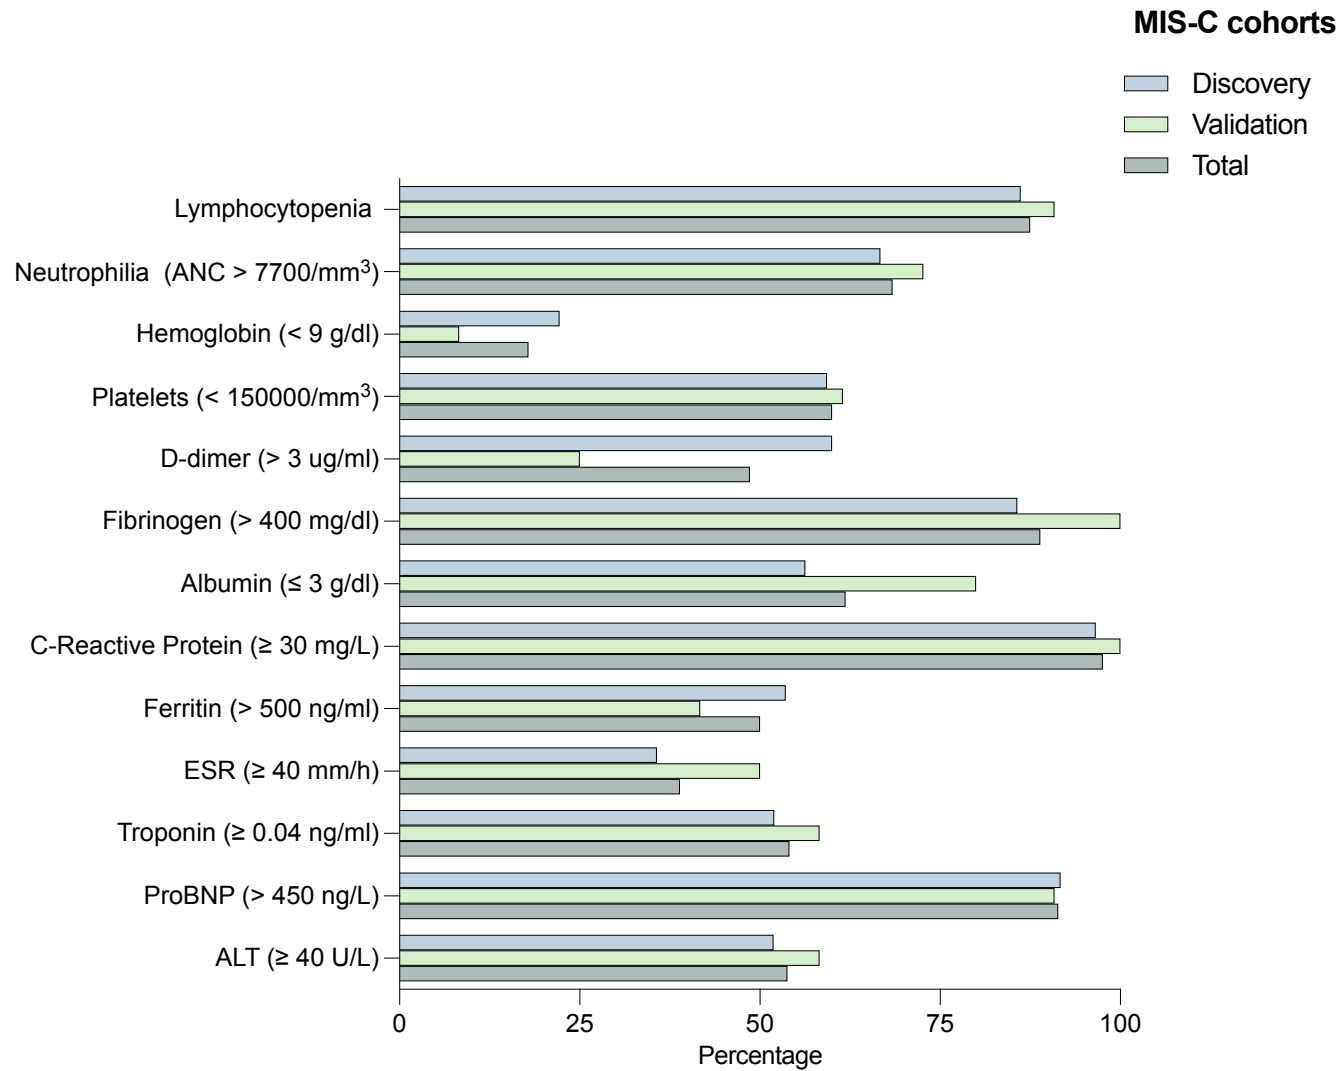

**Supplementary Figure S2. Characteristic laboratory parameters of the MIS-C patients included in the study.** Following the criteria used for MIS-C patients in Feldstein et al., *N Engl J Med*, 2020. Lymphocytopenia was defined as an absolute lymphocyte count (ALC) of less than 1500 per microliter in patients 8 months of age or older, and less than 4500 per microliter in patients younger than 8 months of age. Abbreviations: ALT, Alanine aminotransferase; ANC, Absolute neutrophil count; ESR, Erythrocyte sedimentation rate; ProBNP, pro-brain natriuretic peptide.

**A**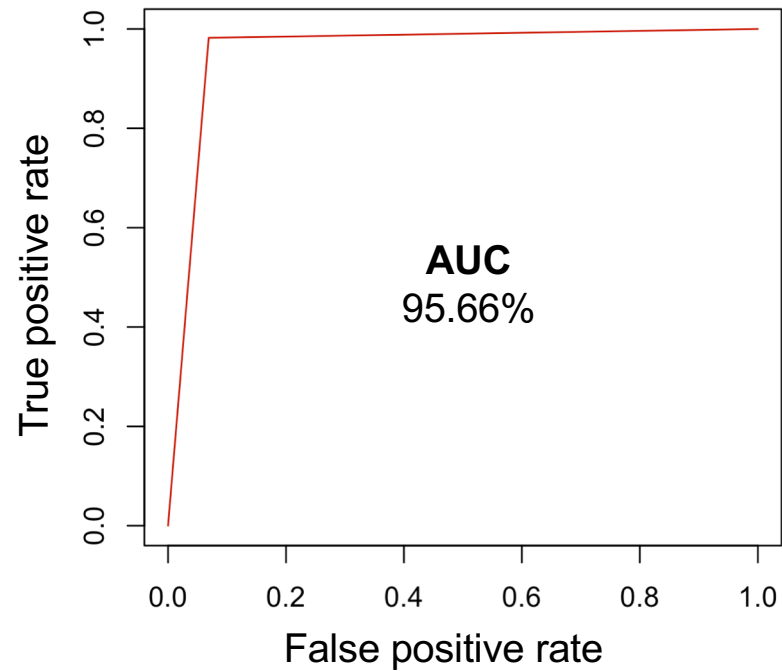**B**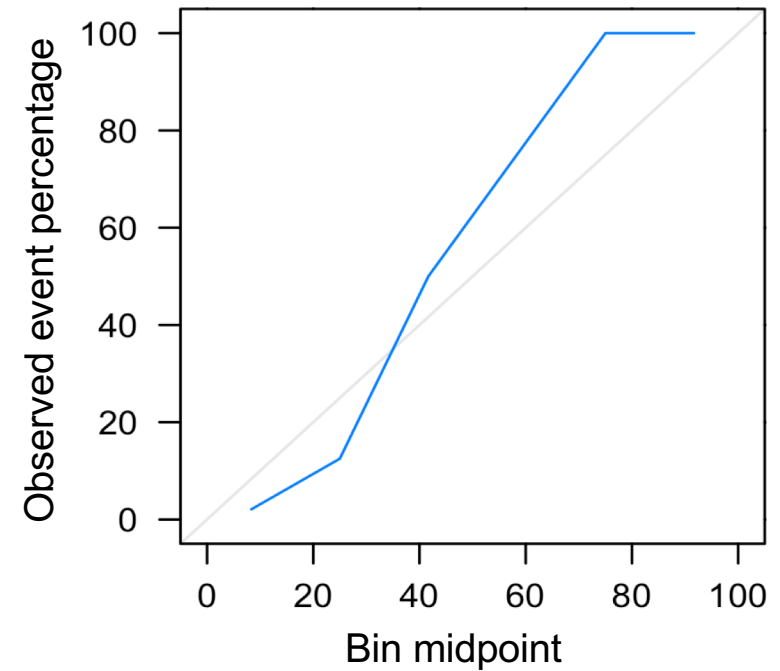

**Supplementary Figure S3.** EPIMISC performance in the discovery cohort. **A.** Receiver Operating Characteristic (ROC) curve and Area Under the Curve (AUC = 95.66% (95% confidence interval = 90.65% to 100%)) for the EPIMISC signature. **B.** Calibration curve using 6 bins to characterize the consistency between EPIMISC predicted class probabilities and observed event rates.

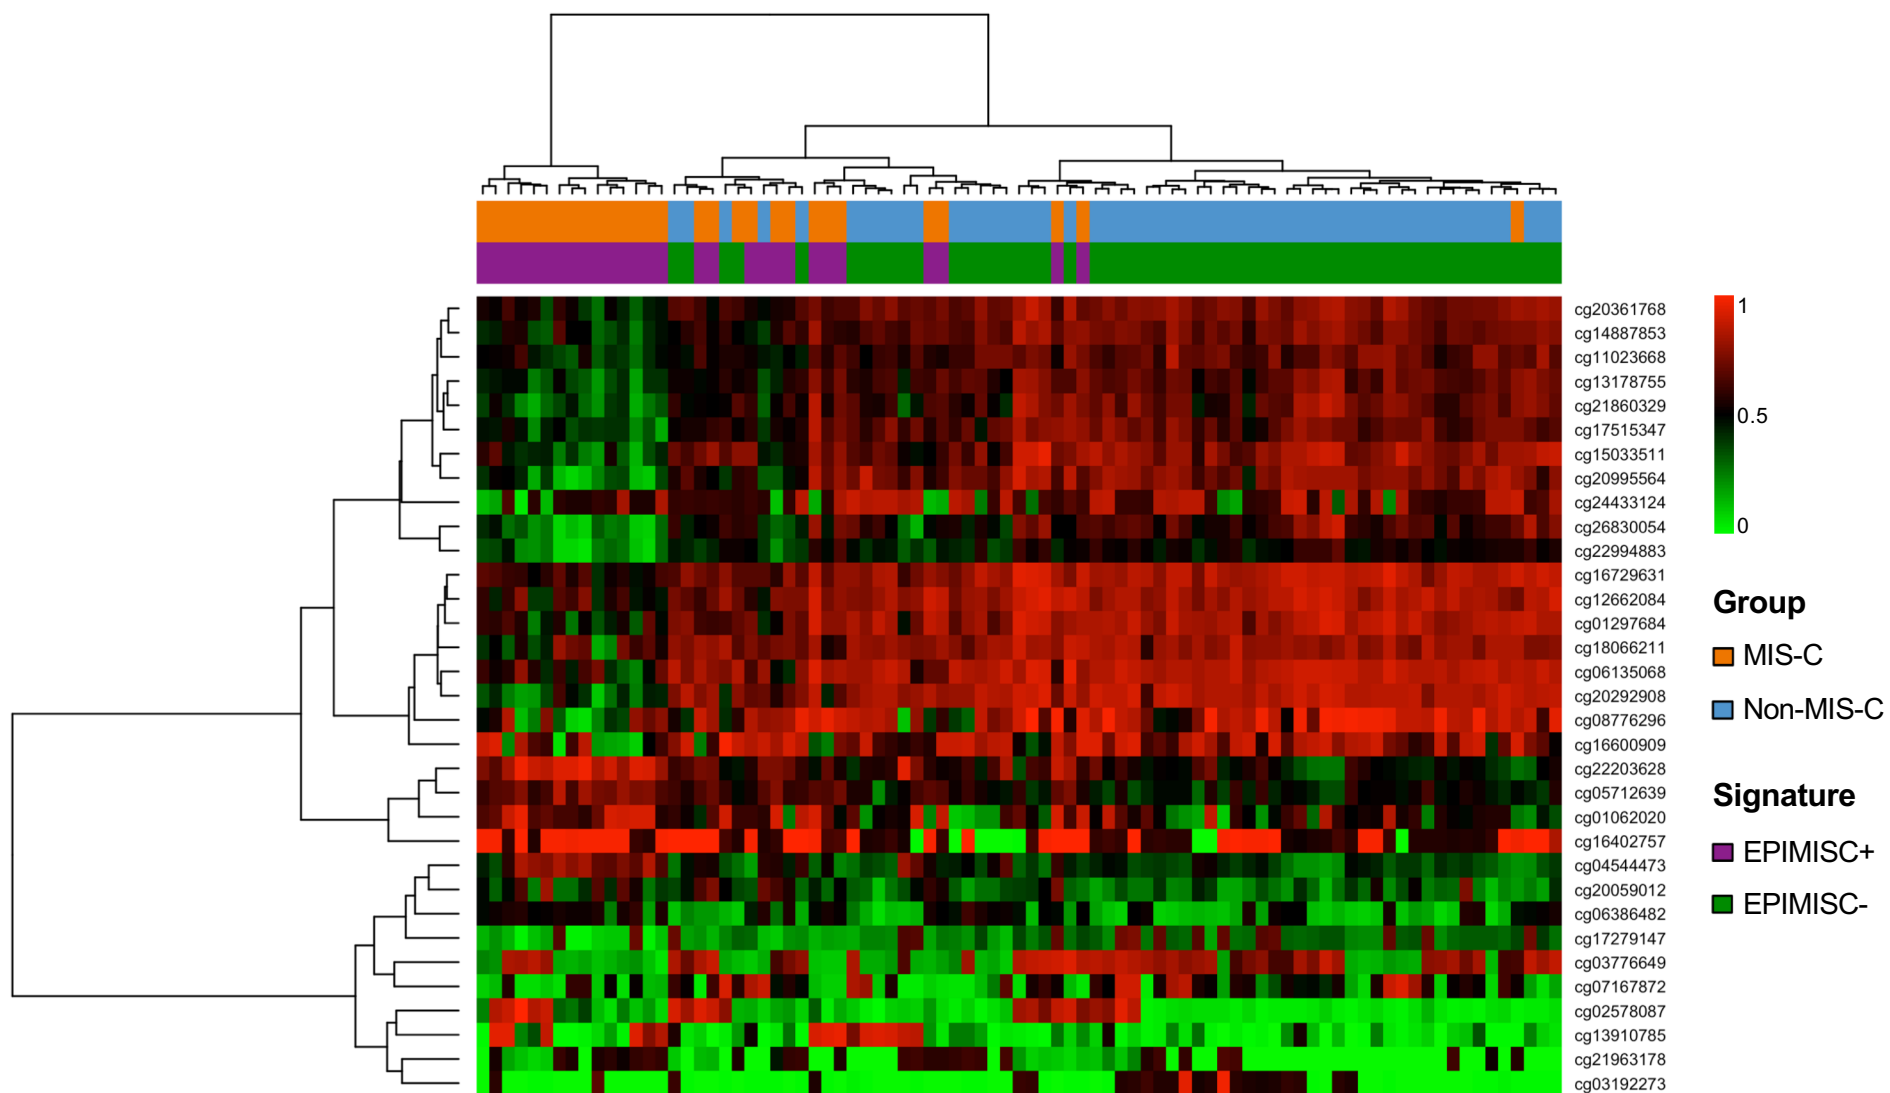

**Supplementary Figure S4.** Heatmap of the discovery cohort samples, clustered by methylation beta values of the 33 CpGs defining the EPIMISC signature. Cluster analysis was performed using the Ward.D clustering method and assuming Manhattan distances.

**A**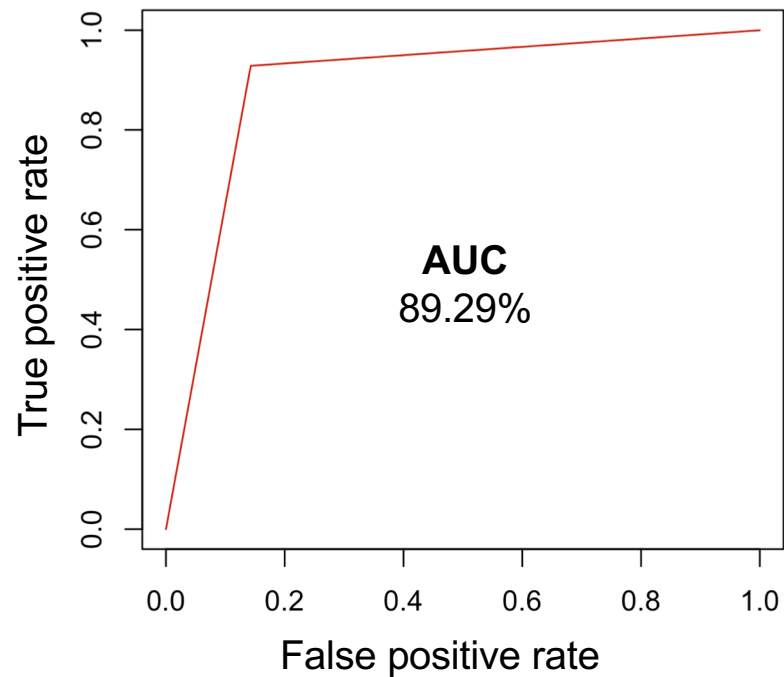**B**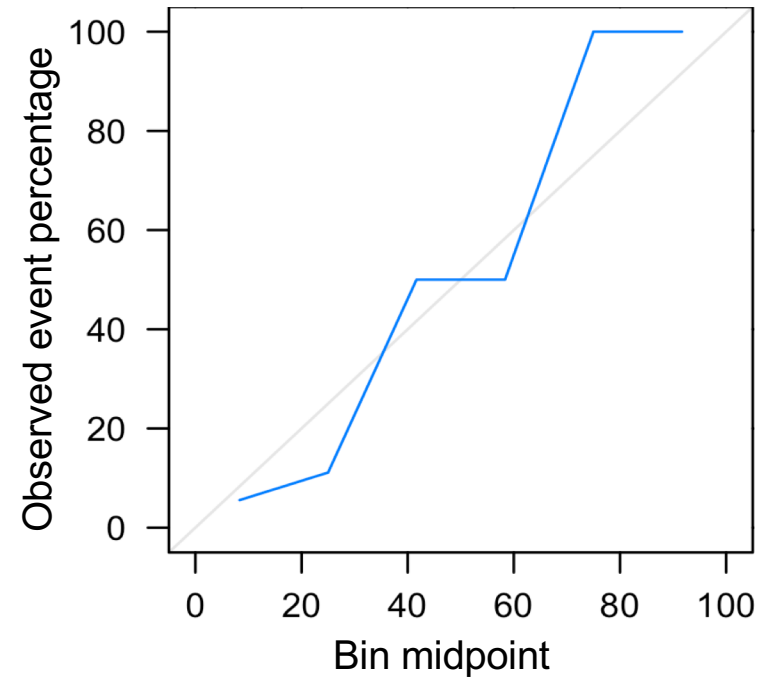

**Supplementary Figure S5.** EPIMISC performance in the validation cohort. **A.** Receiver Operating Characteristic (ROC) curve and Area Under the Curve (AUC = 89.29% (95% confidence interval = 78.61% to 99.97%)) for the EPIMISC signature. **B.** Calibration curve using 6 bins to characterize the consistency between EPIMISC predicted class probabilities and observed event rates.

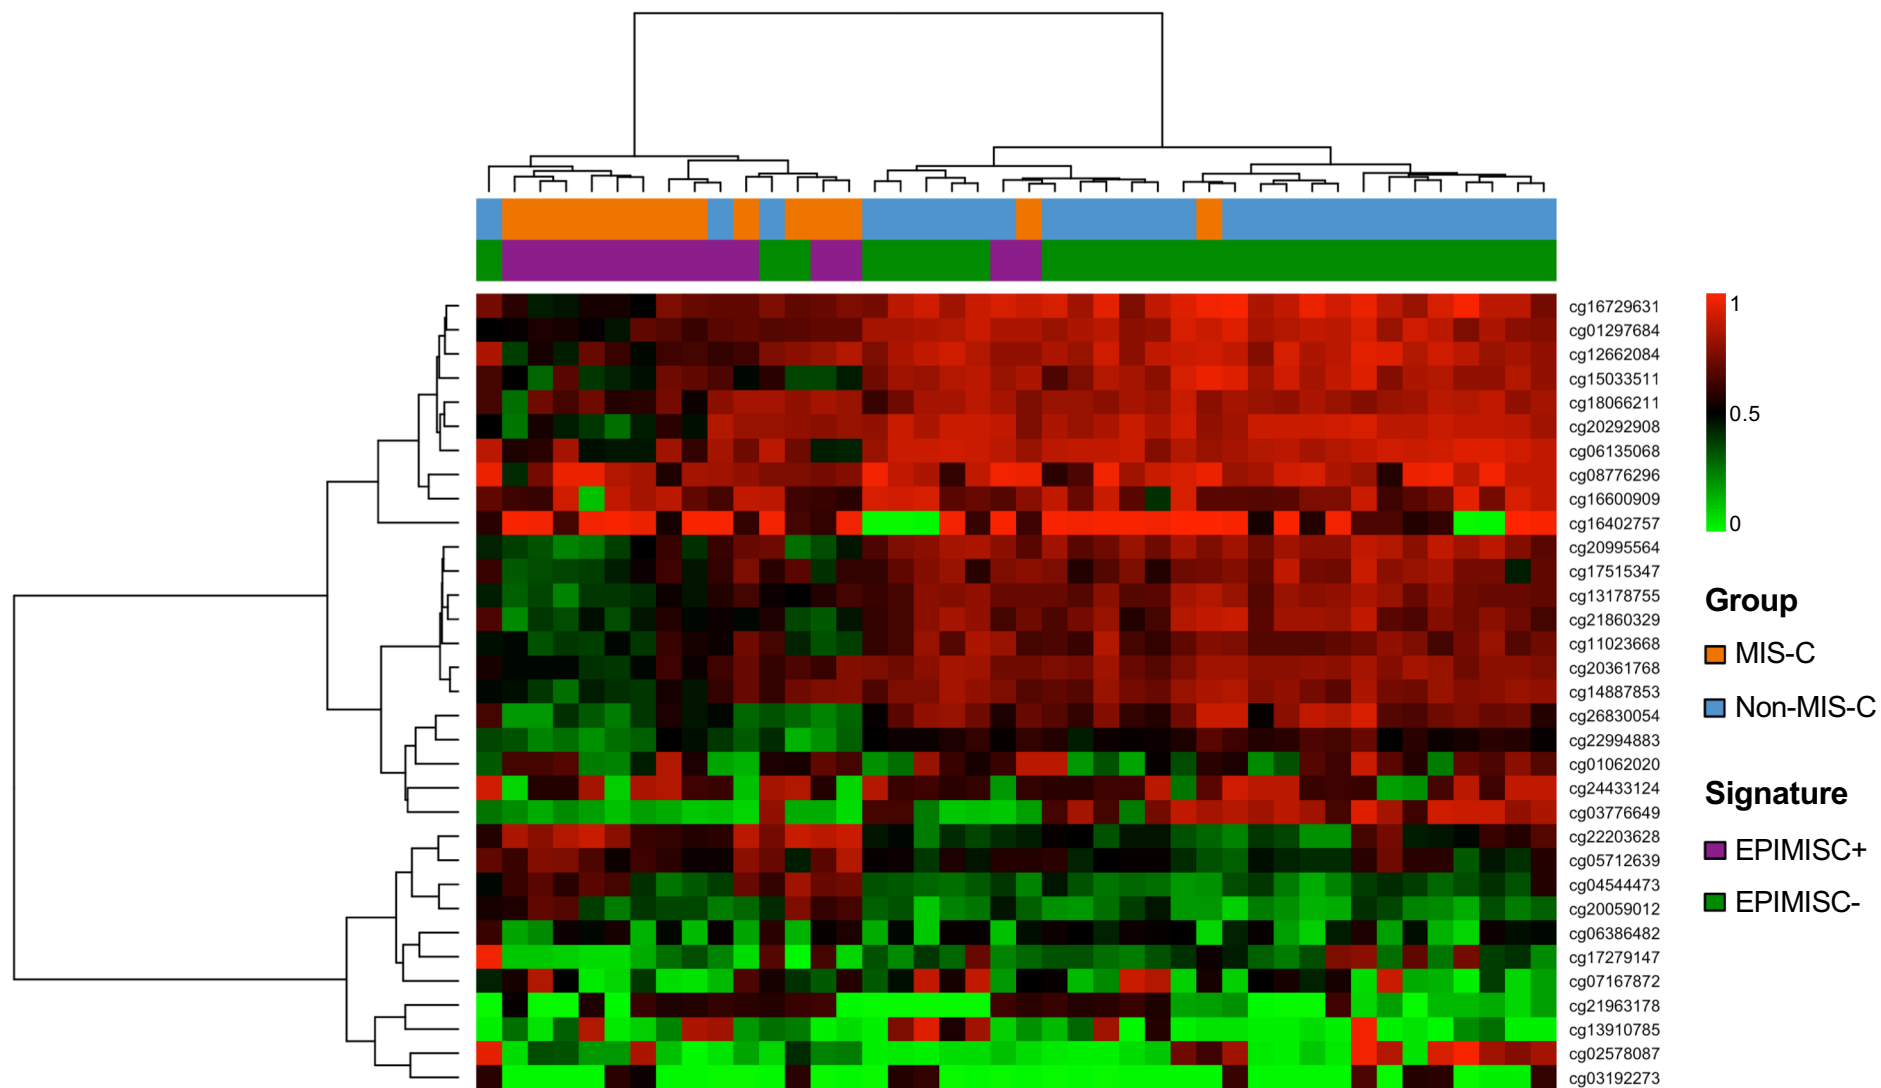

**Supplementary Figure S6.** Heatmap of the validation cohort samples, clustered by methylation beta values of the 33 CpGs defining the EPIMISC signature. Cluster analysis was performed using the Ward.D clustering method and assuming Manhattan distances.

**A**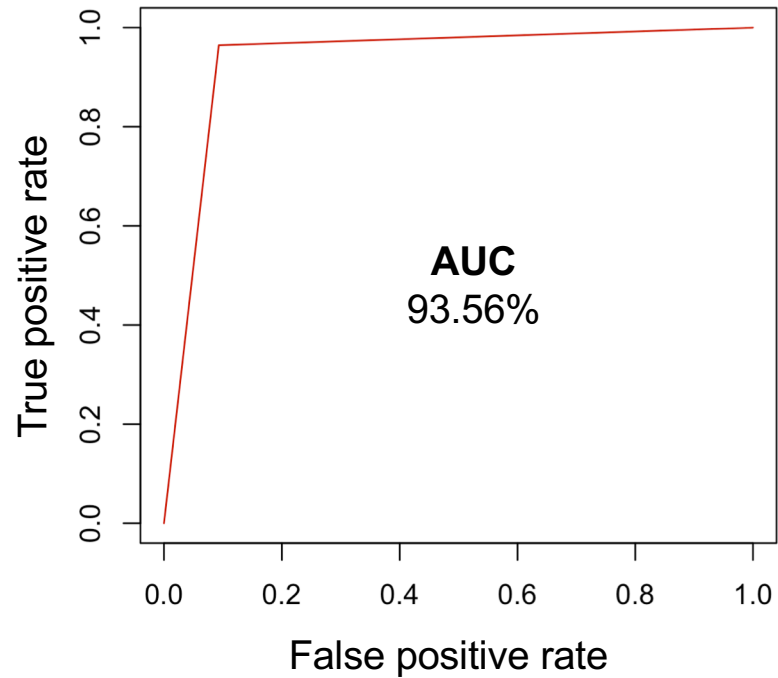**B**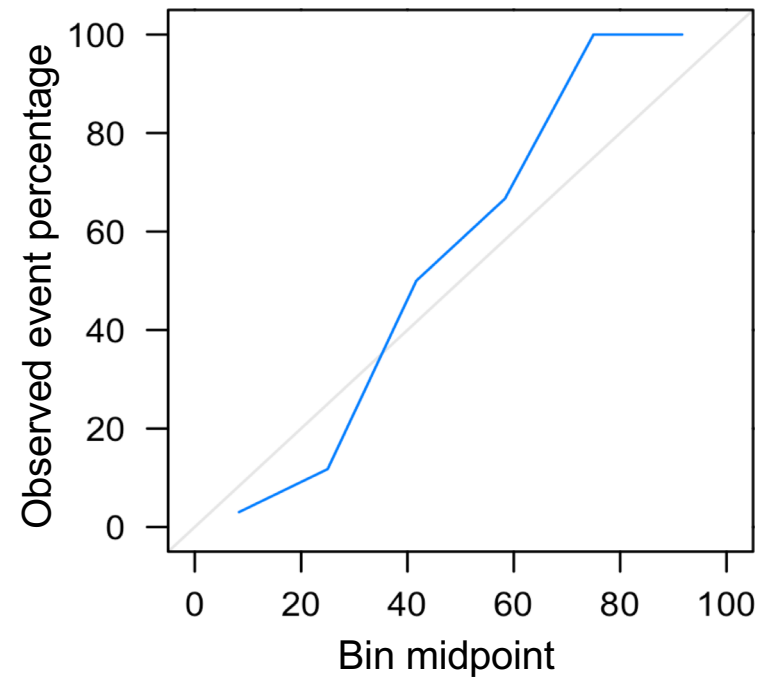

**Supplementary Figure S7.** EPIMISC performance in the entire cohort. **A.** Receiver Operating Characteristic (ROC) curve and Area Under the Curve (AUC = 93.56% (95% confidence interval = 88.74% to 98.39%)) for the EPIMISC signature. **B.** Calibration curve using 6 bins to characterize the consistency between EPIMISC predicted class probabilities and observed event rates.



**Supplementary Table S1.** Characteristics of the pediatric COVID-19 patients with IgG and/or PCR positive status for SARS-CoV-2, but without MIS-C.

| Characteristics                               | Pediatric COVID-19 cohorts   |                              |                           |
|-----------------------------------------------|------------------------------|------------------------------|---------------------------|
|                                               | Discovery cohort<br>(N = 10) | Validation cohort<br>(N = 5) | Entire cohort<br>(N = 15) |
| <b>Gender - Frequency (%)</b>                 |                              |                              |                           |
| Female                                        | 3 (30.0%)                    | 0 (0%)                       | 3 (20.0%)                 |
| Male                                          | 7 (70.0%)                    | 5 (100%)                     | 12 (80.0%)                |
| <b>Age (years) - Median [range]</b>           | 7.0 [0 - 13]                 | 7.2 [0 - 13]                 | 7.1 [0 - 13]              |
| <b>Age group- Frequency (%)</b>               |                              |                              |                           |
| ≤ 2 yr                                        | 2 (20.0%)                    | 2 (40.0%)                    | 4 (26.7%)                 |
| 3 – 5 yr                                      | 1 (10.0%)                    | 0 (0%)                       | 1 (6.7%)                  |
| 6 – 9 yr                                      | 5 (50.0%)                    | 1 (20.0%)                    | 6 (40.0%)                 |
| 10 – 13 yr                                    | 2 (20.0%)                    | 2 (40.0%)                    | 4 (26.7%)                 |
| <b>Ethnicity - Frequency (%)</b>              |                              |                              |                           |
| West-Eurasia                                  | 10 (100%)                    | 3 (60.0%)                    | 13 (86.7%)                |
| Central-South America                         | 0 (0%)                       | 1 (20.0%)                    | 1 (6.7%)                  |
| African                                       | 0 (0%)                       | 1 (20.0%)                    | 1 (6.7%)                  |
| <b>SARS-CoV-2 status- Frequency (%)</b>       |                              |                              |                           |
| IgG and/or PCR positive                       | 10 (100%)                    | 5 (100%)                     | 15 (100%)                 |
| <b>Highest level of care - Frequency (%)</b>  |                              |                              |                           |
| Home                                          | 2 (20.0%)                    | 1 (20.0%)                    | 3 (20.0%)                 |
| Ward                                          | 4 (40.0%)                    | 2 (40.0%)                    | 6 (40.0%)                 |
| Intensive care unit                           | 4 (40.0%)                    | 2 (40.0%)                    | 6 (40.0%)                 |
| <b>Oxygen supplementation - Frequency (%)</b> |                              |                              |                           |
| None                                          | 3 (30.0%)                    | 3 (60.0%)                    | 6 (40.0%)                 |
| Nasal cannula                                 | 4 (40.0%)                    | 0 (0%)                       | 4 (26.7%)                 |
| Non-Invasive Ventilation or High Flow Oxygen  | 3 (30.0%)                    | 1 (20.0%)                    | 4 (26.7%)                 |
| Mechanical Ventilation                        | 0 (0%)                       | 1 (20.0%)                    | 1 (6.7%)                  |

**Supplementary Table S2.** Characteristics of the children and adolescent control donors collected during the pre-COVID-19 period.

| Characteristics                                 | Pediatric control donor cohorts |                               |                           |
|-------------------------------------------------|---------------------------------|-------------------------------|---------------------------|
|                                                 | Discovery cohort<br>(N = 46)    | Validation cohort<br>(N = 23) | Entire cohort<br>(N = 69) |
| <b>Gender</b> - Frequency (%)                   |                                 |                               |                           |
| Female                                          | 24 (52.2%)                      | 14 (60.9%)                    | 38 (55.1%)                |
| Male                                            | 22 (47.8%)                      | 9 (39.1%)                     | 31 (44.9%)                |
| <b>Age (years)</b> - Median [range]             | 9.7 [2 - 17]                    | 8.8 [3 - 16]                  | 9.4 [2 - 17]              |
| <b>Age group</b> - Frequency (%)                |                                 |                               |                           |
| ≤ 2 yr                                          | 4 (8.7%)                        | 0 (0%)                        | 4 (5.8%)                  |
| 3 – 5 yr                                        | 6 (13.0%)                       | 8 (34.8%)                     | 14 (20.3%)                |
| 6 – 9 yr                                        | 10 (21.7%)                      | 6 (26.1%)                     | 16 (23.2%)                |
| 10 – 13 yr                                      | 13 (28.3%)                      | 2 (8.7%)                      | 15 (21.7%)                |
| 14 – 18 yr                                      | 13 (28.3%)                      | 7 (30.4%)                     | 20 (29.0%)                |
| <b>Ethnicity</b> - Frequency (%)                |                                 |                               |                           |
| West-Eurasia                                    | 31 (67.4%)                      | 11 (47.8%)                    | 42 (60.9%)                |
| Central-South America                           | 1 (2.2%)                        | 1 (4.3%)                      | 2 (2.9%)                  |
| African                                         | 1 (2.2%)                        | 0 (20.0%)                     | 1 (1.4%)                  |
| Unknown                                         | 13 (28.2%)                      | 11 (47.8%)                    | 24 (34.7%)                |
| <b>Sampling date</b> - Frequency (%)            |                                 |                               |                           |
| Pre-COVID-19 pandemic<br>(before December 2019) | 46 (100%)                       | 23 (100%)                     | 69 (100%)                 |

**Supplementary Table S3.** Description of the 33 CpG sites with a differential DNA methylation status between MIS-C and non-MIS-C in the discovery cohort, according to the study pipeline described in Supplementary Figure S1.

| CpG ID     | Chromosome location | Gene name    | P value | Absolute mean methylation difference |
|------------|---------------------|--------------|---------|--------------------------------------|
| cg20292908 | chr5:172203421      |              | < 0.001 | 0.30                                 |
| cg20995564 | chr2:145172035      | ZEB2         | < 0.001 | 0.27                                 |
| cg06135068 | chr16:31034016      |              | < 0.001 | 0.22                                 |
| cg16402757 | chr10:35311004      | CUL2         | 0.010   | 0.21                                 |
| cg26830054 | chr10:119762394     |              | < 0.001 | 0.20                                 |
| cg15033511 | chr17:54994023      |              | < 0.001 | 0.20                                 |
| cg01062020 | chr1:162382848      | SH2D1B       | 0.001   | 0.19                                 |
| cg03776649 | chr5:125465533      |              | 0.023   | 0.19                                 |
| cg22203628 | chr11:69241075      |              | < 0.001 | 0.19                                 |
| cg02578087 | chr3:8671361        | SSUH2        | 0.009   | 0.18                                 |
| cg01297684 | chr12:56069634      |              | < 0.001 | 0.18                                 |
| cg20361768 | chr3:156819083      | LINC00880    | < 0.001 | 0.18                                 |
| cg06386482 | chr6:47624117       | GPR111       | < 0.001 | 0.18                                 |
| cg21963178 | chr10:75571738      | NDST2        | 0.001   | 0.18                                 |
| cg24433124 | chr6:30755968       |              | 0.004   | 0.17                                 |
| cg13910785 | chr6:32549849       | HLA-DRB1     | 0.042   | 0.17                                 |
| cg05712639 | chr14:52819386      |              | < 0.001 | 0.17                                 |
| cg03192273 | chr5:150618948      |              | 0.028   | 0.16                                 |
| cg21860329 | chr13:42265546      | VWA8         | < 0.001 | 0.16                                 |
| cg14887853 | chr6:139794538      | LOC645434    | < 0.001 | 0.16                                 |
| cg12662084 | chr6:17809126       | KIF13A       | < 0.001 | 0.16                                 |
| cg16600909 | chr1:173145001      |              | 0.012   | 0.15                                 |
| cg13178755 | chr2:174023580      | ZAK          | < 0.001 | 0.15                                 |
| cg20059012 | chr12:53613154      | RARG         | < 0.001 | 0.15                                 |
| cg07167872 | chr1:205819463      | PM20D1       | 0.033   | 0.15                                 |
| cg16729631 | chr8:131000261      |              | < 0.001 | 0.15                                 |
| cg17515347 | chr1:159047163      | AIM2         | < 0.001 | 0.15                                 |
| cg11023668 | chr2:25095040       | ADCY3        | < 0.001 | 0.15                                 |
| cg22994883 | chr7:130615334      |              | < 0.001 | 0.15                                 |
| cg04544473 | chr4:153021978      | LOC100996286 | < 0.001 | 0.15                                 |
| cg18066211 | chr4:99369082       |              | < 0.001 | 0.15                                 |
| cg17279147 | chr6:14739369       |              | 0.001   | 0.15                                 |
| cg08776296 | chr7:134856544      | CYREN        | 0.014   | 0.15                                 |

Notes: CpG ID corresponds to the unique CpG site identifier in the HumanMethylationEPIC array (Illumina). Chromosomal location denoted according human reference assembly GRCh37/hg19. All depicted P values are FDR adjusted P values. CpG-sites with an absolute mean methylation beta value difference > 0.15 and FDR adjusted P value < 0.05 were considered statistically significant.

**Supplementary Table S4.** Description of the 1337 CpG sites in the 47 genes related to COVID-19, based on published studies\*.

| <b>CpG ID</b> | <b>Chromosome location</b> | <b>Gene name</b> | <b>P value</b> | <b>Absolute mean methylation difference</b> |
|---------------|----------------------------|------------------|----------------|---------------------------------------------|
| cg23232263    | chrX:15579482              | ACE2             | 0.015          | 0.052                                       |
| cg05039749    | chrX:15583512              | ACE2             | 0.016          | 0.021                                       |
| cg22422976    | chrX:15584867              | ACE2             | 0.076          | 0.087                                       |
| cg25176872    | chrX:15584988              | ACE2             | 0.158          | 0.033                                       |
| cg16716680    | chrX:15585368              | ACE2             | 0.044          | 0.094                                       |
| cg04013915    | chrX:15586143              | ACE2             | 0.120          | 0.080                                       |
| cg20119767    | chrX:15612969              | ACE2             | 0.448          | 0.026                                       |
| cg05241917    | chrX:15616197              | ACE2             | 0.778          | 0.005                                       |
| cg10408040    | chrX:15619136              | ACE2             | 0.047          | 0.023                                       |
| cg05748796    | chrX:15619337              | ACE2             | 0.899          | 0.000                                       |
| cg16734967    | chrX:15620103              | ACE2             | 0.259          | 0.023                                       |
| cg08559914    | chrX:15620240              | ACE2             | 0.009          | 0.013                                       |
| cg03536816    | chrX:15621042              | ACE2             | 0.018          | 0.075                                       |
| cg18877734    | chrX:15621084              | ACE2             | 0.931          | 0.000                                       |
| cg21598868    | chrX:15621167              | ACE2             | 0.340          | 0.032                                       |
| cg18458833    | chrX:15621477              | ACE2             | 0.313          | 0.006                                       |
| cg19776619    | chr19:569801               | BSG              | 0.640          | 0.001                                       |
| cg04015604    | chr19:569965               | BSG              | 0.575          | 0.002                                       |
| cg26529300    | chr19:570458               | BSG              | 0.308          | 0.031                                       |
| cg01532103    | chr19:571107               | BSG              | 0.564          | 0.002                                       |
| cg17382033    | chr19:571114               | BSG              | 0.698          | 0.001                                       |
| cg27641720    | chr19:571120               | BSG              | 0.092          | 0.005                                       |
| cg02129274    | chr19:571177               | BSG              | 0.420          | 0.002                                       |
| cg05622915    | chr19:571204               | BSG              | 0.266          | 0.002                                       |
| cg25660646    | chr19:571323               | BSG              | 0.020          | 0.003                                       |
| cg17522907    | chr19:571416               | BSG              | 0.863          | 0.000                                       |
| cg07513435    | chr19:571744               | BSG              | 0.807          | 0.002                                       |
| cg18341969    | chr19:571802               | BSG              | 0.193          | 0.003                                       |
| cg10641392    | chr19:572279               | BSG              | 0.831          | 0.001                                       |
| cg11982443    | chr19:572297               | BSG              | 0.021          | 0.004                                       |
| cg22431486    | chr19:572309               | BSG              | 0.417          | 0.003                                       |
| cg21717879    | chr19:572359               | BSG              | 0.712          | 0.001                                       |
| cg15456960    | chr19:572669               | BSG              | 0.588          | 0.000                                       |
| cg06894251    | chr19:572721               | BSG              | 0.864          | 0.000                                       |
| cg06546033    | chr19:573090               | BSG              | 0.720          | 0.002                                       |
| cg25572267    | chr19:573480               | BSG              | 0.357          | 0.002                                       |
| cg12953747    | chr19:573647               | BSG              | 0.178          | 0.007                                       |
| cg01241899    | chr19:573758               | BSG              | 0.742          | 0.001                                       |
| cg09629510    | chr19:574762               | BSG              | 0.009          | 0.032                                       |
| cg19271640    | chr19:574881               | BSG              | 0.026          | 0.026                                       |

|            |               |        |         |       |
|------------|---------------|--------|---------|-------|
| cg03079637 | chr19:574899  | BSG    | 0.004   | 0.033 |
| cg17640894 | chr19:574950  | BSG    | 0.020   | 0.023 |
| cg03233876 | chr19:575412  | BSG    | 0.017   | 0.022 |
| cg23919549 | chr19:576047  | BSG    | 0.247   | 0.004 |
| cg22913585 | chr19:577938  | BSG    | 0.193   | 0.002 |
| cg04698845 | chr19:578093  | BSG    | 0.612   | 0.001 |
| cg00752531 | chr19:578440  | BSG    | 0.906   | 0.000 |
| cg01794046 | chr19:578648  | BSG    | 0.059   | 0.013 |
| cg05475770 | chr19:579192  | BSG    | 0.708   | 0.002 |
| cg11427463 | chr19:579361  | BSG    | 0.456   | 0.015 |
| cg08541599 | chr19:579501  | BSG    | 0.252   | 0.017 |
| cg22842143 | chr19:579592  | BSG    | 0.832   | 0.001 |
| cg06810134 | chr19:581326  | BSG    | 0.793   | 0.002 |
| cg10362365 | chr19:581404  | BSG    | 0.936   | 0.000 |
| cg26721694 | chr19:581428  | BSG    | 0.698   | 0.000 |
| cg08238794 | chr19:581564  | BSG    | 0.516   | 0.004 |
| cg19651003 | chr19:583049  | BSG    | 0.050   | 0.016 |
| cg03830490 | chr3:45926669 | CCR9   | 0.936   | 0.000 |
| cg24603476 | chr3:45927105 | CCR9   | 0.024   | 0.009 |
| cg27198997 | chr3:45927589 | CCR9   | < 0.001 | 0.017 |
| cg09033997 | chr3:45927601 | CCR9   | 0.026   | 0.006 |
| cg06519172 | chr3:45927630 | CCR9   | 0.010   | 0.012 |
| cg17642041 | chr3:45928007 | CCR9   | 0.057   | 0.021 |
| cg06997537 | chr3:45928018 | CCR9   | 0.024   | 0.031 |
| cg23519441 | chr3:45929350 | CCR9   | 0.003   | 0.035 |
| cg17885452 | chr3:45930958 | CCR9   | 0.007   | 0.039 |
| cg25155774 | chr3:45932141 | CCR9   | 0.177   | 0.007 |
| cg00786084 | chr3:45942460 | CCR9   | 0.001   | 0.041 |
| cg14558191 | chr3:45943637 | CCR9   | 0.233   | 0.003 |
| cg14525884 | chr3:45944114 | CCR9   | 0.358   | 0.003 |
| cg01588525 | chr3:45944247 | CCR9   | 0.809   | 0.000 |
| cg04015765 | chr19:7805430 | CD209  | 0.647   | 0.012 |
| cg26704759 | chr19:7807617 | CD209  | 0.027   | 0.019 |
| cg01452452 | chr19:7807999 | CD209  | 0.682   | 0.003 |
| cg01618851 | chr19:7812265 | CD209  | 0.945   | 0.002 |
| cg21848746 | chr19:7812568 | CD209  | 0.149   | 0.026 |
| cg06122489 | chr19:7813167 | CD209  | 0.054   | 0.016 |
| cg07608333 | chr19:7813422 | CD209  | 0.073   | 0.024 |
| cg02794892 | chr19:7813901 | CD209  | 0.274   | 0.014 |
| cg04412303 | chr19:7813963 | CD209  | 0.529   | 0.010 |
| cg12147572 | chr19:7827744 | CLEC4M | 0.444   | 0.003 |
| cg07584894 | chr19:7827802 | CLEC4M | 0.353   | 0.003 |
| cg00480077 | chr19:7827894 | CLEC4M | 0.425   | 0.003 |
| cg21372914 | chr19:7828144 | CLEC4M | 0.170   | 0.010 |
| cg18515510 | chr19:7831896 | CLEC4M | 0.907   | 0.002 |
| cg11615959 | chr19:7834128 | CLEC4M | 0.218   | 0.004 |

|            |                |       |         |       |
|------------|----------------|-------|---------|-------|
| cg13815445 | chr11:88028475 | CTSC  | 0.004   | 0.025 |
| cg21044820 | chr11:88030631 | CTSC  | 0.183   | 0.004 |
| cg12710531 | chr11:88032774 | CTSC  | 0.104   | 0.004 |
| cg21562812 | chr11:88041491 | CTSC  | 0.090   | 0.004 |
| cg09555097 | chr11:88049447 | CTSC  | 0.388   | 0.012 |
| cg25636441 | chr11:88059527 | CTSC  | 0.006   | 0.010 |
| cg03596479 | chr11:88059873 | CTSC  | 0.033   | 0.030 |
| cg08522340 | chr11:88068493 | CTSC  | 0.463   | 0.041 |
| cg09706192 | chr11:88068895 | CTSC  | 0.074   | 0.043 |
| cg16118839 | chr11:88069169 | CTSC  | < 0.001 | 0.075 |
| cg09280946 | chr11:88070661 | CTSC  | 0.133   | 0.001 |
| cg16588061 | chr11:88070780 | CTSC  | 0.354   | 0.002 |
| cg15581365 | chr11:88071006 | CTSC  | 0.503   | 0.001 |
| cg01742905 | chr11:88071023 | CTSC  | 0.502   | 0.001 |
| cg11733478 | chr11:88071037 | CTSC  | 0.003   | 0.013 |
| cg12747487 | chr11:88071039 | CTSC  | 0.007   | 0.009 |
| cg11868029 | chr11:88071041 | CTSC  | 0.715   | 0.001 |
| cg25902627 | chr11:88071152 | CTSC  | 0.112   | 0.006 |
| cg24637319 | chr11:88071195 | CTSC  | 0.793   | 0.000 |
| cg12391538 | chr11:88071409 | CTSC  | 0.228   | 0.004 |
| cg15571376 | chr11:88071458 | CTSC  | 0.205   | 0.002 |
| cg03183608 | chr11:88071760 | CTSC  | 0.879   | 0.000 |
| cg13985445 | chr9:90340577  | CTSL1 | 0.016   | 0.022 |
| cg11154542 | chr9:90340652  | CTSL1 | 0.023   | 0.016 |
| cg14236855 | chr9:90341041  | CTSL1 | 0.439   | 0.002 |
| cg15242570 | chr9:90341048  | CTSL1 | 0.859   | 0.002 |
| cg14243623 | chr9:90341158  | CTSL1 | 0.118   | 0.010 |
| cg14557714 | chr9:90341385  | CTSL1 | 0.409   | 0.001 |
| cg11306701 | chr9:90341458  | CTSL1 | 0.905   | 0.003 |
| cg14190128 | chr9:90342638  | CTSL1 | 0.402   | 0.005 |
| cg21177940 | chr9:90344705  | CTSL1 | 0.159   | 0.009 |
| cg08033130 | chr3:45983597  | CXCR6 | 0.637   | 0.031 |
| cg19145607 | chr3:45983792  | CXCR6 | 0.794   | 0.011 |
| cg07983767 | chr3:45984158  | CXCR6 | 0.373   | 0.017 |
| cg03682895 | chr3:45984585  | CXCR6 | 0.019   | 0.007 |
| cg05705212 | chr3:45984743  | CXCR6 | < 0.001 | 0.037 |
| cg08450017 | chr3:45984838  | CXCR6 | < 0.001 | 0.107 |
| cg05979583 | chr3:45984851  | CXCR6 | < 0.001 | 0.101 |
| cg13480043 | chr3:45984883  | CXCR6 | 0.012   | 0.032 |
| cg25226014 | chr3:45984942  | CXCR6 | < 0.001 | 0.084 |
| cg01178899 | chr3:45985168  | CXCR6 | < 0.001 | 0.087 |
| cg04544784 | chr3:45986281  | CXCR6 | < 0.001 | 0.018 |
| cg05963956 | chr3:45986287  | CXCR6 | 0.177   | 0.004 |
| cg26896911 | chr3:45986498  | CXCR6 | < 0.001 | 0.067 |
| cg26466027 | chr3:45989744  | CXCR6 | 0.562   | 0.012 |
| cg20427486 | chr2:162849137 | DPP4  | 0.390   | 0.007 |

|            |                |      |         |       |
|------------|----------------|------|---------|-------|
| cg03688421 | chr2:162857123 | DPP4 | 0.036   | 0.013 |
| cg04512966 | chr2:162859453 | DPP4 | 0.010   | 0.033 |
| cg17205440 | chr2:162864033 | DPP4 | 0.002   | 0.027 |
| cg04444758 | chr2:162871045 | DPP4 | 0.104   | 0.011 |
| cg08652858 | chr2:162872807 | DPP4 | 0.867   | 0.000 |
| cg10934831 | chr2:162874136 | DPP4 | 0.722   | 0.001 |
| cg17278689 | chr2:162874215 | DPP4 | 0.978   | 0.002 |
| cg02902394 | chr2:162874748 | DPP4 | 0.992   | 0.001 |
| cg00273390 | chr2:162874787 | DPP4 | 0.444   | 0.003 |
| cg20817669 | chr2:162875463 | DPP4 | < 0.001 | 0.032 |
| cg02039580 | chr2:162878125 | DPP4 | 0.007   | 0.017 |
| cg08318371 | chr2:162881135 | DPP4 | 0.872   | 0.001 |
| cg24098944 | chr2:162885448 | DPP4 | 0.765   | 0.001 |
| cg00235671 | chr2:162886026 | DPP4 | < 0.001 | 0.036 |
| cg16172329 | chr2:162907368 | DPP4 | 0.374   | 0.003 |
| cg24094122 | chr2:162915893 | DPP4 | < 0.001 | 0.061 |
| cg15353603 | chr2:162915902 | DPP4 | < 0.001 | 0.063 |
| cg03241330 | chr2:162920114 | DPP4 | < 0.001 | 0.037 |
| cg12649175 | chr2:162927003 | DPP4 | 0.486   | 0.010 |
| cg17714581 | chr2:162928426 | DPP4 | 0.888   | 0.001 |
| cg09316885 | chr2:162929318 | DPP4 | < 0.001 | 0.042 |
| cg24827032 | chr2:162929690 | DPP4 | 0.085   | 0.026 |
| cg19350270 | chr2:162929832 | DPP4 | 0.456   | 0.014 |
| cg16617101 | chr2:162930153 | DPP4 | 0.606   | 0.007 |
| cg14022057 | chr2:162930175 | DPP4 | 0.531   | 0.005 |
| cg01907512 | chr2:162930212 | DPP4 | 0.710   | 0.001 |
| cg10112391 | chr2:162930376 | DPP4 | 0.087   | 0.007 |
| cg20053454 | chr2:162930454 | DPP4 | 0.244   | 0.002 |
| cg10507402 | chr2:162930666 | DPP4 | 0.073   | 0.001 |
| cg09601770 | chr2:162930671 | DPP4 | 0.674   | 0.001 |
| cg25912827 | chr2:162930805 | DPP4 | 0.821   | 0.000 |
| cg21565914 | chr2:162931175 | DPP4 | 0.488   | 0.013 |
| cg23246095 | chr2:162931638 | DPP4 | 0.321   | 0.005 |
| cg20539283 | chr2:162932048 | DPP4 | 0.967   | 0.000 |
| cg14779065 | chr2:162932295 | DPP4 | 0.049   | 0.010 |
| cg04037813 | chr19:4675281  | DPP9 | 0.328   | 0.004 |
| cg13513411 | chr19:4676202  | DPP9 | 0.574   | 0.001 |
| cg01098142 | chr19:4676492  | DPP9 | 0.605   | 0.002 |
| cg00491603 | chr19:4676557  | DPP9 | 0.012   | 0.013 |
| cg18328612 | chr19:4676623  | DPP9 | 0.920   | 0.001 |
| cg18317135 | chr19:4677230  | DPP9 | 0.906   | 0.001 |
| cg07230018 | chr19:4677282  | DPP9 | 0.825   | 0.004 |
| cg09508448 | chr19:4679533  | DPP9 | 0.012   | 0.013 |
| cg03775330 | chr19:4682727  | DPP9 | 0.697   | 0.001 |
| cg15544596 | chr19:4683273  | DPP9 | 0.731   | 0.002 |
| cg10344433 | chr19:4684712  | DPP9 | 0.010   | 0.006 |

|               |                |        |         |       |
|---------------|----------------|--------|---------|-------|
| cg22519738    | chr19:4684891  | DPP9   | 0.758   | 0.000 |
| cg22521640    | chr19:4685815  | DPP9   | 0.951   | 0.001 |
| cg22768335    | chr19:4687000  | DPP9   | 0.610   | 0.006 |
| cg14531512    | chr19:4687389  | DPP9   | 0.845   | 0.001 |
| cg03247293    | chr19:4687469  | DPP9   | 0.073   | 0.010 |
| cg25730440    | chr19:4688549  | DPP9   | 0.542   | 0.003 |
| cg02907425    | chr19:4688820  | DPP9   | 0.274   | 0.005 |
| cg15746870    | chr19:4689573  | DPP9   | 0.738   | 0.001 |
| cg13514178    | chr19:4689839  | DPP9   | 0.154   | 0.007 |
| cg09356750    | chr19:4691020  | DPP9   | 0.233   | 0.005 |
| cg14477543    | chr19:4691599  | DPP9   | 0.764   | 0.001 |
| cg00163735    | chr19:4692258  | DPP9   | 0.384   | 0.005 |
| cg19526579    | chr19:4692861  | DPP9   | 0.170   | 0.005 |
| cg00503832    | chr19:4693592  | DPP9   | 0.784   | 0.001 |
| ch.19.253092F | chr19:4694205  | DPP9   | 0.045   | 0.006 |
| cg23356090    | chr19:4695683  | DPP9   | 0.039   | 0.021 |
| cg24142638    | chr19:4697453  | DPP9   | 0.415   | 0.006 |
| cg15355185    | chr19:4700434  | DPP9   | 0.530   | 0.004 |
| cg21853992    | chr19:4700601  | DPP9   | 0.102   | 0.007 |
| cg03734301    | chr19:4702458  | DPP9   | 0.471   | 0.003 |
| cg01152629    | chr19:4705838  | DPP9   | 0.700   | 0.003 |
| cg07204134    | chr19:4707215  | DPP9   | 0.307   | 0.003 |
| cg10165241    | chr19:4709493  | DPP9   | < 0.001 | 0.066 |
| cg11781328    | chr19:4712833  | DPP9   | 0.571   | 0.004 |
| cg07317566    | chr19:4713160  | DPP9   | 0.503   | 0.008 |
| cg07469449    | chr19:4715647  | DPP9   | 0.905   | 0.001 |
| cg22802746    | chr19:4717348  | DPP9   | 0.895   | 0.000 |
| cg07582623    | chr19:4718742  | DPP9   | 0.529   | 0.002 |
| cg22561727    | chr19:4719848  | DPP9   | 0.463   | 0.003 |
| cg08361380    | chr19:4720405  | DPP9   | 0.011   | 0.024 |
| cg18347423    | chr19:4723614  | DPP9   | 0.769   | 0.000 |
| cg14964934    | chr19:4723942  | DPP9   | 0.052   | 0.001 |
| cg00371891    | chr19:4723959  | DPP9   | 0.128   | 0.004 |
| cg16723130    | chr19:4723970  | DPP9   | 0.491   | 0.002 |
| cg24423897    | chr19:4723980  | DPP9   | 0.982   | 0.001 |
| cg02362719    | chr19:4724564  | DPP9   | 0.182   | 0.002 |
| cg04163916    | chr19:4724653  | DPP9   | 0.007   | 0.006 |
| cg15404665    | chr19:4724679  | DPP9   | 0.990   | 0.000 |
| cg07317664    | chr19:4724991  | DPP9   | 0.114   | 0.006 |
| cg12739264    | chr19:4725282  | DPP9   | 0.897   | 0.002 |
| cg18295261    | chr14:55736570 | FBXO34 | 0.501   | 0.004 |
| cg22468235    | chr14:55737358 | FBXO34 | 0.149   | 0.004 |
| cg04071872    | chr14:55737596 | FBXO34 | 0.589   | 0.010 |
| cg18427465    | chr14:55737629 | FBXO34 | 0.070   | 0.034 |
| cg03911395    | chr14:55737812 | FBXO34 | 0.067   | 0.004 |
| cg18251245    | chr14:55737854 | FBXO34 | 0.194   | 0.003 |



|            |                |        |         |       |
|------------|----------------|--------|---------|-------|
| cg21761232 | chr14:55737906 | FBXO34 | 0.632   | 0.001 |
| cg10184292 | chr14:55737941 | FBXO34 | 0.200   | 0.002 |
| cg00390969 | chr14:55737947 | FBXO34 | 0.156   | 0.003 |
| cg08336832 | chr14:55737949 | FBXO34 | 0.938   | 0.000 |
| cg08430068 | chr14:55738118 | FBXO34 | 0.026   | 0.001 |
| cg03088104 | chr14:55738121 | FBXO34 | 0.016   | 0.001 |
| cg10378898 | chr14:55738124 | FBXO34 | 0.002   | 0.001 |
| cg14947789 | chr14:55738283 | FBXO34 | 0.277   | 0.001 |
| cg16351352 | chr14:55738545 | FBXO34 | 0.183   | 0.002 |
| cg11449689 | chr14:55738743 | FBXO34 | 0.760   | 0.000 |
| cg07017275 | chr14:55738748 | FBXO34 | 0.571   | 0.001 |
| cg18846554 | chr14:55738783 | FBXO34 | 0.059   | 0.001 |
| cg03362590 | chr14:55738839 | FBXO34 | 0.501   | 0.001 |
| cg15990800 | chr14:55738852 | FBXO34 | 0.010   | 0.005 |
| cg20664017 | chr14:55738888 | FBXO34 | 0.983   | 0.000 |
| cg00043265 | chr14:55738961 | FBXO34 | 0.770   | 0.000 |
| cg02577881 | chr14:55739068 | FBXO34 | 0.053   | 0.008 |
| cg12572748 | chr14:55739560 | FBXO34 | 0.037   | 0.021 |
| cg19885224 | chr14:55740146 | FBXO34 | 0.014   | 0.041 |
| cg07085167 | chr14:55740496 | FBXO34 | 0.814   | 0.001 |
| cg12786198 | chr14:55741714 | FBXO34 | 0.008   | 0.024 |
| cg07001857 | chr14:55745250 | FBXO34 | 0.099   | 0.012 |
| cg07489121 | chr14:55747523 | FBXO34 | 0.502   | 0.004 |
| cg17984612 | chr14:55753104 | FBXO34 | 0.328   | 0.004 |
| cg17290573 | chr14:55753374 | FBXO34 | 0.072   | 0.025 |
| cg14053764 | chr14:55761432 | FBXO34 | < 0.001 | 0.093 |
| cg05890727 | chr14:55764647 | FBXO34 | < 0.001 | 0.128 |
| cg01518344 | chr14:55766026 | FBXO34 | 0.318   | 0.003 |
| cg03487305 | chr14:55767032 | FBXO34 | 0.131   | 0.007 |
| cg10940698 | chr14:55767824 | FBXO34 | 0.889   | 0.000 |
| cg04853218 | chr14:55769688 | FBXO34 | 0.007   | 0.030 |
| cg21709263 | chr14:55784552 | FBXO34 | 0.021   | 0.012 |
| cg08139688 | chr14:55793634 | FBXO34 | 0.020   | 0.016 |
| cg04971161 | chr14:55794598 | FBXO34 | 0.012   | 0.020 |
| cg12034641 | chr14:55799643 | FBXO34 | < 0.001 | 0.088 |
| cg00703299 | chr14:55800645 | FBXO34 | 0.728   | 0.003 |
| cg04236980 | chr14:55800924 | FBXO34 | < 0.001 | 0.079 |
| cg20068747 | chr14:55804636 | FBXO34 | < 0.001 | 0.115 |
| cg12242949 | chr14:55806966 | FBXO34 | 0.004   | 0.024 |
| cg14897683 | chr14:55807184 | FBXO34 | 0.971   | 0.000 |
| cg25483140 | chr14:55807333 | FBXO34 | 0.297   | 0.004 |
| cg01565905 | chr14:55815940 | FBXO34 | 0.001   | 0.054 |
| cg23234828 | chr14:55818341 | FBXO34 | 0.475   | 0.008 |
| cg23236908 | chr14:55819305 | FBXO34 | 0.011   | 0.010 |
| cg07529087 | chr15:91410508 | FURIN  | 0.003   | 0.016 |
| cg11117530 | chr15:91410755 | FURIN  | 0.925   | 0.000 |

|            |                |       |         |       |
|------------|----------------|-------|---------|-------|
| cg21792018 | chr15:91410847 | FURIN | 0.931   | 0.000 |
| cg24958468 | chr15:91411462 | FURIN | 0.029   | 0.009 |
| cg23208881 | chr15:91411495 | FURIN | 0.993   | 0.000 |
| cg02864248 | chr15:91411838 | FURIN | 0.199   | 0.007 |
| cg26377677 | chr15:91412118 | FURIN | 0.859   | 0.002 |
| cg19348484 | chr15:91413236 | FURIN | < 0.001 | 0.071 |
| cg07381960 | chr15:91413642 | FURIN | 0.011   | 0.014 |
| cg13083201 | chr15:91413783 | FURIN | 0.069   | 0.009 |
| cg12539442 | chr15:91414030 | FURIN | 0.466   | 0.006 |
| cg24387797 | chr15:91414270 | FURIN | < 0.001 | 0.021 |
| cg11582017 | chr15:91414499 | FURIN | 0.157   | 0.004 |
| cg24191278 | chr15:91414591 | FURIN | 0.884   | 0.000 |
| cg12297162 | chr15:91414593 | FURIN | 0.171   | 0.002 |
| cg24483306 | chr15:91414797 | FURIN | 0.333   | 0.002 |
| cg24259688 | chr15:91414844 | FURIN | 0.743   | 0.002 |
| cg01930518 | chr15:91414850 | FURIN | 0.572   | 0.007 |
| cg18274515 | chr15:91415532 | FURIN | 0.525   | 0.001 |
| cg04791659 | chr15:91415812 | FURIN | 0.025   | 0.024 |
| cg05466844 | chr15:91415964 | FURIN | 0.933   | 0.002 |
| cg23662846 | chr15:91416006 | FURIN | 0.013   | 0.033 |
| cg07162861 | chr15:91416008 | FURIN | 0.266   | 0.031 |
| cg12722937 | chr15:91416047 | FURIN | 0.255   | 0.008 |
| cg10698959 | chr15:91416060 | FURIN | 0.436   | 0.005 |
| cg00207731 | chr15:91416118 | FURIN | 0.006   | 0.035 |
| cg17019377 | chr15:91417710 | FURIN | 0.003   | 0.051 |
| cg13821613 | chr15:91418757 | FURIN | 0.775   | 0.002 |
| cg05469396 | chr15:91419421 | FURIN | 0.207   | 0.005 |
| cg22145651 | chr15:91419540 | FURIN | 0.721   | 0.002 |
| cg07281959 | chr15:91421381 | FURIN | 0.884   | 0.000 |
| cg25614263 | chr15:91421585 | FURIN | 0.035   | 0.009 |
| cg18926580 | chr15:91422143 | FURIN | 0.983   | 0.000 |
| cg03177204 | chr15:91422169 | FURIN | 0.095   | 0.013 |
| cg27503675 | chr15:91422702 | FURIN | 0.491   | 0.003 |
| cg05958346 | chr15:91422794 | FURIN | 0.672   | 0.001 |
| cg08372296 | chr15:91422917 | FURIN | 0.846   | 0.002 |
| cg19780300 | chr15:91422948 | FURIN | 0.769   | 0.002 |
| cg17396638 | chr15:91423337 | FURIN | 0.923   | 0.006 |
| cg25242556 | chr15:91423375 | FURIN | 0.355   | 0.001 |
| cg12075901 | chr15:91423415 | FURIN | 0.897   | 0.001 |
| cg25639557 | chr15:91423574 | FURIN | 0.579   | 0.002 |
| cg00758797 | chr15:91424646 | FURIN | 0.974   | 0.000 |
| cg09112160 | chr15:91424658 | FURIN | 0.664   | 0.002 |
| cg14231966 | chr15:91424718 | FURIN | 0.926   | 0.001 |
| cg05122887 | chr15:91424836 | FURIN | 0.683   | 0.002 |
| cg12015851 | chr15:91425292 | FURIN | 0.078   | 0.014 |
| cg16992008 | chr3:45961867  | FYCO1 | 0.739   | 0.002 |

|              |                |       |         |       |
|--------------|----------------|-------|---------|-------|
| cg20652158   | chr3:45965449  | FYCO1 | 0.856   | 0.008 |
| cg19951818   | chr3:45969823  | FYCO1 | 0.816   | 0.001 |
| cg03152139   | chr3:45970474  | FYCO1 | 0.080   | 0.012 |
| ch.3.946759R | chr3:45979073  | FYCO1 | 0.846   | 0.000 |
| cg05873635   | chr3:45980975  | FYCO1 | 0.549   | 0.003 |
| cg16320329   | chr3:45981161  | FYCO1 | 0.005   | 0.034 |
| cg27123613   | chr3:45982438  | FYCO1 | 0.368   | 0.004 |
| cg17542594   | chr3:45990547  | FYCO1 | 0.299   | 0.003 |
| cg06187522   | chr3:46000100  | FYCO1 | < 0.001 | 0.038 |
| cg07343122   | chr3:46000900  | FYCO1 | 0.990   | 0.000 |
| cg24899967   | chr3:46003807  | FYCO1 | < 0.001 | 0.042 |
| cg21080682   | chr3:46008371  | FYCO1 | 0.520   | 0.003 |
| cg08257567   | chr3:46009762  | FYCO1 | 0.189   | 0.005 |
| cg13941085   | chr3:46010476  | FYCO1 | 0.005   | 0.010 |
| cg08042841   | chr3:46014624  | FYCO1 | 0.458   | 0.003 |
| cg07949967   | chr3:46017480  | FYCO1 | 0.188   | 0.011 |
| cg16286502   | chr3:46020045  | FYCO1 | 0.006   | 0.046 |
| cg19375371   | chr3:46021163  | FYCO1 | 0.004   | 0.057 |
| cg09251548   | chr3:46022682  | FYCO1 | 0.608   | 0.002 |
| ch.3.948191R | chr3:46024851  | FYCO1 | 0.084   | 0.003 |
| cg09923715   | chr3:46027565  | FYCO1 | 0.940   | 0.000 |
| cg03695289   | chr3:46027639  | FYCO1 | 0.769   | 0.001 |
| cg04732163   | chr3:46029147  | FYCO1 | 0.053   | 0.009 |
| cg11211486   | chr3:46033800  | FYCO1 | 0.532   | 0.011 |
| cg04415535   | chr3:46034485  | FYCO1 | 0.004   | 0.062 |
| cg18682028   | chr3:46035439  | FYCO1 | < 0.001 | 0.066 |
| cg24208206   | chr3:46036571  | FYCO1 | 0.421   | 0.011 |
| cg04799181   | chr3:46037014  | FYCO1 | 0.272   | 0.003 |
| cg15068835   | chr3:46037408  | FYCO1 | 0.081   | 0.003 |
| cg12920938   | chr3:46037457  | FYCO1 | 0.225   | 0.002 |
| cg05573133   | chr3:46037470  | FYCO1 | 0.053   | 0.002 |
| cg03245407   | chr3:46037472  | FYCO1 | 0.364   | 0.002 |
| cg04619627   | chr3:46037496  | FYCO1 | 0.182   | 0.011 |
| cg12609415   | chr3:46037548  | FYCO1 | 0.123   | 0.023 |
| cg16042668   | chr3:46037592  | FYCO1 | 0.546   | 0.018 |
| cg24919972   | chr3:46037608  | FYCO1 | 0.326   | 0.011 |
| cg06585734   | chr3:46037942  | FYCO1 | 0.322   | 0.012 |
| cg12062507   | chr3:46037976  | FYCO1 | < 0.001 | 0.057 |
| cg00397283   | chr19:10444479 | ICAM3 | 0.822   | 0.002 |
| cg07976603   | chr19:10444506 | ICAM3 | 0.921   | 0.004 |
| cg14667838   | chr19:10445908 | ICAM3 | 0.497   | 0.006 |
| cg13981319   | chr19:10446556 | ICAM3 | 0.990   | 0.000 |
| cg05323251   | chr19:10449942 | ICAM3 | 0.841   | 0.007 |
| cg14145194   | chr19:10450022 | ICAM3 | 0.391   | 0.009 |
| cg23671824   | chr19:10450323 | ICAM3 | 0.804   | 0.001 |
| cg13021446   | chr19:10450346 | ICAM3 | 0.002   | 0.002 |

|            |                |        |         |       |
|------------|----------------|--------|---------|-------|
| cg00911290 | chr19:10450361 | ICAM3  | 0.614   | 0.001 |
| cg06855803 | chr19:10450364 | ICAM3  | 0.056   | 0.005 |
| cg16659963 | chr19:10450375 | ICAM3  | 0.166   | 0.004 |
| cg18054725 | chr19:10450472 | ICAM3  | 0.118   | 0.004 |
| cg26972937 | chr19:10450862 | ICAM3  | 0.930   | 0.001 |
| cg08782606 | chr19:10450872 | ICAM3  | 0.128   | 0.019 |
| cg21901386 | chr19:10451423 | ICAM3  | 0.944   | 0.000 |
| cg05202822 | chr19:10451653 | ICAM3  | 0.927   | 0.000 |
| cg03279442 | chr2:163150027 | IFIH1  | 0.007   | 0.090 |
| cg24105617 | chr2:163155125 | IFIH1  | 0.734   | 0.009 |
| cg07181667 | chr2:163157840 | IFIH1  | 0.102   | 0.006 |
| cg03463287 | chr2:163163925 | IFIH1  | 0.035   | 0.013 |
| cg08888522 | chr2:163172908 | IFIH1  | 0.503   | 0.006 |
| cg00531628 | chr2:163174891 | IFIH1  | 0.050   | 0.003 |
| cg07348311 | chr2:163174896 | IFIH1  | 0.008   | 0.004 |
| cg19533050 | chr2:163175044 | IFIH1  | 0.002   | 0.002 |
| cg24885055 | chr2:163175046 | IFIH1  | 0.575   | 0.001 |
| cg06347928 | chr2:163175126 | IFIH1  | 0.215   | 0.004 |
| cg23553385 | chr2:163175143 | IFIH1  | 0.730   | 0.001 |
| cg18340987 | chr2:163175241 | IFIH1  | 0.388   | 0.001 |
| cg02029939 | chr2:163175255 | IFIH1  | 0.001   | 0.004 |
| cg02276086 | chr2:163175335 | IFIH1  | 0.164   | 0.004 |
| cg21810130 | chr2:163175381 | IFIH1  | 0.156   | 0.002 |
| cg09755666 | chr2:163175400 | IFIH1  | 0.472   | 0.003 |
| cg16971745 | chr2:163175403 | IFIH1  | 0.783   | 0.001 |
| cg23280745 | chr2:163175536 | IFIH1  | 0.734   | 0.001 |
| cg19965693 | chr2:163175743 | IFIH1  | 0.222   | 0.021 |
| cg21060789 | chr2:163176242 | IFIH1  | 0.350   | 0.004 |
| cg26974214 | chr10:91151885 | IFIT1  | 0.002   | 0.021 |
| cg16395953 | chr10:91152122 | IFIT1  | < 0.001 | 0.008 |
| cg11748577 | chr10:91152280 | IFIT1  | < 0.001 | 0.011 |
| cg15019617 | chr10:91152447 | IFIT1  | 0.208   | 0.002 |
| cg05552874 | chr10:91153143 | IFIT1  | 0.230   | 0.027 |
| cg07508980 | chr10:91164540 | IFIT1  | 0.483   | 0.004 |
| cg06920054 | chr21:34696533 | IFNAR1 | 0.086   | 0.003 |
| cg23202109 | chr21:34696546 | IFNAR1 | 0.042   | 0.004 |
| cg14069320 | chr21:34696571 | IFNAR1 | 0.053   | 0.002 |
| cg11758840 | chr21:34696588 | IFNAR1 | 0.011   | 0.007 |
| cg04842828 | chr21:34696676 | IFNAR1 | 0.510   | 0.001 |
| cg14352951 | chr21:34696688 | IFNAR1 | 0.575   | 0.001 |
| cg15382669 | chr21:34697036 | IFNAR1 | 0.032   | 0.006 |
| cg00207965 | chr21:34697220 | IFNAR1 | 0.072   | 0.009 |
| cg15509148 | chr21:34697369 | IFNAR1 | 0.712   | 0.001 |
| cg03866569 | chr21:34697528 | IFNAR1 | 0.339   | 0.006 |
| cg09885409 | chr21:34697563 | IFNAR1 | 0.023   | 0.008 |
| cg06121323 | chr21:34697899 | IFNAR1 | 0.538   | 0.002 |

|            |                |        |         |       |
|------------|----------------|--------|---------|-------|
| cg20274167 | chr21:34699063 | IFNAR1 | 0.010   | 0.078 |
| cg14911223 | chr21:34700152 | IFNAR1 | 0.238   | 0.009 |
| cg12016862 | chr21:34705183 | IFNAR1 | 0.030   | 0.016 |
| cg12078491 | chr21:34718964 | IFNAR1 | < 0.001 | 0.038 |
| cg22029234 | chr21:34720480 | IFNAR1 | 0.037   | 0.005 |
| cg00622702 | chr21:34727950 | IFNAR1 | 0.873   | 0.002 |
| cg04049819 | chr21:34729667 | IFNAR1 | 0.103   | 0.014 |
| cg05667472 | chr21:34730291 | IFNAR1 | 0.701   | 0.002 |
| cg20000468 | chr21:34601686 | IFNAR2 | 0.096   | 0.009 |
| cg01475000 | chr21:34601704 | IFNAR2 | 0.013   | 0.028 |
| cg12269436 | chr21:34601738 | IFNAR2 | 0.929   | 0.002 |
| cg17977197 | chr21:34601762 | IFNAR2 | 0.733   | 0.004 |
| cg17725807 | chr21:34601817 | IFNAR2 | 0.088   | 0.023 |
| cg22454603 | chr21:34602027 | IFNAR2 | 0.775   | 0.001 |
| cg21980821 | chr21:34602030 | IFNAR2 | 0.212   | 0.003 |
| cg20215695 | chr21:34602070 | IFNAR2 | 0.918   | 0.000 |
| cg10309613 | chr21:34602084 | IFNAR2 | 0.675   | 0.001 |
| cg05770313 | chr21:34602116 | IFNAR2 | 0.578   | 0.001 |
| cg00937568 | chr21:34602128 | IFNAR2 | 0.506   | 0.002 |
| cg21355791 | chr21:34602157 | IFNAR2 | 0.075   | 0.002 |
| cg26110456 | chr21:34602354 | IFNAR2 | 0.110   | 0.001 |
| cg18656581 | chr21:34602557 | IFNAR2 | 0.075   | 0.007 |
| cg02431704 | chr21:34602713 | IFNAR2 | 0.008   | 0.007 |
| cg06665941 | chr21:34602869 | IFNAR2 | 0.067   | 0.005 |
| cg24768245 | chr21:34602948 | IFNAR2 | 0.035   | 0.009 |
| cg13208562 | chr21:34603264 | IFNAR2 | 0.004   | 0.005 |
| cg22030766 | chr21:34608899 | IFNAR2 | 0.638   | 0.002 |
| cg24851988 | chr21:34617885 | IFNAR2 | 0.548   | 0.004 |
| cg27342941 | chr21:34619110 | IFNAR2 | 0.470   | 0.017 |
| cg04857551 | chr21:34619143 | IFNAR2 | 0.056   | 0.007 |
| cg06339338 | chr21:34620140 | IFNAR2 | 0.084   | 0.079 |
| cg00288436 | chr21:34625037 | IFNAR2 | 0.462   | 0.006 |
| cg12122356 | chr21:34632557 | IFNAR2 | 0.705   | 0.009 |
| cg24949115 | chr21:34634409 | IFNAR2 | 0.292   | 0.011 |
| cg17748222 | chr21:34634995 | IFNAR2 | 0.309   | 0.003 |
| cg16134430 | chr21:34636155 | IFNAR2 | 0.683   | 0.002 |
| cg01467417 | chr2:113874068 | IL1RN  | 0.995   | 0.001 |
| cg10816993 | chr2:113874415 | IL1RN  | 0.052   | 0.042 |
| cg00303311 | chr2:113874822 | IL1RN  | 0.772   | 0.001 |
| cg03703171 | chr2:113875226 | IL1RN  | 0.928   | 0.001 |
| cg06658391 | chr2:113875233 | IL1RN  | < 0.001 | 0.018 |
| cg11783497 | chr2:113875292 | IL1RN  | 0.074   | 0.010 |
| cg14497465 | chr2:113875377 | IL1RN  | < 0.001 | 0.025 |
| cg17669033 | chr2:113875512 | IL1RN  | 0.240   | 0.007 |
| cg10938446 | chr2:113875723 | IL1RN  | 0.310   | 0.002 |
| cg18783495 | chr2:113876804 | IL1RN  | 0.004   | 0.018 |

|            |                |       |         |       |
|------------|----------------|-------|---------|-------|
| cg23536855 | chr2:113882233 | IL1RN | 0.004   | 0.025 |
| cg04572943 | chr2:113882976 | IL1RN | 0.178   | 0.028 |
| cg00795815 | chr2:113884024 | IL1RN | 0.055   | 0.024 |
| cg25928199 | chr2:113884376 | IL1RN | 0.099   | 0.015 |
| cg23041410 | chr2:113884447 | IL1RN | 0.055   | 0.008 |
| cg01991967 | chr2:113884734 | IL1RN | 0.914   | 0.002 |
| cg02543462 | chr2:113885116 | IL1RN | 0.106   | 0.025 |
| cg03989987 | chr2:113885277 | IL1RN | 0.010   | 0.050 |
| cg02377053 | chr2:113885838 | IL1RN | 0.001   | 0.012 |
| cg25265126 | chr2:113891507 | IL1RN | < 0.001 | 0.050 |
| cg17067544 | chr7:22765321  | IL6   | 0.004   | 0.038 |
| cg10140158 | chr7:22765750  | IL6   | 0.788   | 0.004 |
| cg01770232 | chr7:22766155  | IL6   | 0.824   | 0.008 |
| cg00087425 | chr7:22766829  | IL6   | 0.076   | 0.012 |
| cg15703690 | chr7:22766992  | IL6   | < 0.001 | 0.030 |
| cg20509117 | chr7:22767314  | IL6   | 0.314   | 0.033 |
| cg13104385 | chr7:22767384  | IL6   | 0.300   | 0.027 |
| cg05265849 | chr7:22767390  | IL6   | 0.417   | 0.030 |
| cg07998387 | chr7:22767571  | IL6   | 0.008   | 0.031 |
| cg02335517 | chr7:22768438  | IL6   | 0.073   | 0.010 |
| cg03172226 | chr19:50162898 | IRF3  | 0.112   | 0.021 |
| cg06444294 | chr19:50164473 | IRF3  | 0.944   | 0.001 |
| cg18517766 | chr19:50164488 | IRF3  | 0.199   | 0.006 |
| cg27662875 | chr19:50165232 | IRF3  | 0.866   | 0.001 |
| cg16253779 | chr19:50165958 | IRF3  | 0.983   | 0.000 |
| cg17540624 | chr19:50167792 | IRF3  | 0.161   | 0.002 |
| cg23029494 | chr19:50167926 | IRF3  | 0.174   | 0.002 |
| cg11519876 | chr19:50168004 | IRF3  | 0.307   | 0.001 |
| cg12107692 | chr19:50168026 | IRF3  | 0.725   | 0.000 |
| cg21035241 | chr19:50168129 | IRF3  | 0.848   | 0.001 |
| cg13102229 | chr19:50168131 | IRF3  | 0.258   | 0.002 |
| cg25264707 | chr19:50168190 | IRF3  | 0.023   | 0.003 |
| cg05182906 | chr19:50168328 | IRF3  | 0.683   | 0.001 |
| cg22136800 | chr19:50168459 | IRF3  | 0.218   | 0.003 |
| cg09250473 | chr19:50168907 | IRF3  | 0.108   | 0.006 |
| cg07333040 | chr19:50168911 | IRF3  | 0.630   | 0.003 |
| cg07215350 | chr19:50169079 | IRF3  | 0.760   | 0.000 |
| cg23891596 | chr19:50169132 | IRF3  | 0.952   | 0.002 |
| cg06490385 | chr19:50169153 | IRF3  | 0.645   | 0.000 |
| cg22761099 | chr19:50169171 | IRF3  | 0.526   | 0.001 |
| cg09712606 | chr19:50169182 | IRF3  | 0.558   | 0.001 |
| cg05495029 | chr19:50169187 | IRF3  | 0.814   | 0.001 |
| cg06639101 | chr19:50169228 | IRF3  | 0.257   | 0.001 |
| cg18477816 | chr11:612588   | IRF7  | 0.348   | 0.005 |
| cg03755158 | chr11:612680   | IRF7  | 0.024   | 0.012 |
| cg27271532 | chr11:612762   | IRF7  | 0.004   | 0.021 |

|            |               |        |         |       |
|------------|---------------|--------|---------|-------|
| cg05309505 | chr11:612837  | IRF7   | 0.806   | 0.001 |
| cg20989454 | chr11:613478  | IRF7   | 0.852   | 0.001 |
| cg16486109 | chr11:613632  | IRF7   | 0.059   | 0.042 |
| cg17114584 | chr11:613792  | IRF7   | 0.137   | 0.021 |
| cg22199238 | chr11:613857  | IRF7   | 0.092   | 0.021 |
| cg23540139 | chr11:614521  | IRF7   | 0.103   | 0.013 |
| cg08926253 | chr11:614761  | IRF7   | 0.203   | 0.018 |
| cg22016995 | chr11:614787  | IRF7   | 0.627   | 0.001 |
| cg12037516 | chr11:614954  | IRF7   | 0.852   | 0.001 |
| cg16541031 | chr11:615519  | IRF7   | 0.938   | 0.001 |
| cg13406746 | chr11:615583  | IRF7   | 0.930   | 0.000 |
| cg05460606 | chr11:615635  | IRF7   | 0.346   | 0.001 |
| cg09396517 | chr11:615642  | IRF7   | 0.957   | 0.001 |
| cg06770435 | chr11:615716  | IRF7   | 0.057   | 0.001 |
| cg18956798 | chr11:615721  | IRF7   | 0.128   | 0.001 |
| cg18131537 | chr11:615732  | IRF7   | 0.293   | 0.001 |
| cg24064264 | chr11:615945  | IRF7   | 0.930   | 0.000 |
| cg07652350 | chr11:616009  | IRF7   | 0.288   | 0.001 |
| cg22559350 | chr11:616011  | IRF7   | 0.119   | 0.001 |
| cg13145591 | chr11:616038  | IRF7   | 0.548   | 0.001 |
| cg13378284 | chr11:616089  | IRF7   | 0.525   | 0.002 |
| cg18971819 | chr11:616112  | IRF7   | 0.037   | 0.008 |
| cg09703963 | chr11:616879  | IRF7   | 0.984   | 0.002 |
| cg00645579 | chr11:617140  | IRF7   | < 0.001 | 0.088 |
| cg01842473 | chr11:617407  | IRF7   | 0.125   | 0.002 |
| cg01714160 | chr11:617467  | IRF7   | 0.626   | 0.000 |
| cg15780465 | chr11:617476  | IRF7   | 0.692   | 0.001 |
| cg18769584 | chr3:45866619 | LZTFL1 | 0.826   | 0.001 |
| cg00482389 | chr3:45867935 | LZTFL1 | < 0.001 | 0.078 |
| cg01865626 | chr3:45874300 | LZTFL1 | 0.774   | 0.001 |
| cg02909320 | chr3:45879990 | LZTFL1 | 0.727   | 0.001 |
| cg03032607 | chr3:45882686 | LZTFL1 | 0.519   | 0.009 |
| cg06799455 | chr3:45882924 | LZTFL1 | 0.036   | 0.007 |
| cg08661012 | chr3:45883249 | LZTFL1 | 0.341   | 0.003 |
| cg17500645 | chr3:45883368 | LZTFL1 | 0.011   | 0.002 |
| cg18713168 | chr3:45883381 | LZTFL1 | 0.724   | 0.000 |
| cg14999852 | chr3:45883529 | LZTFL1 | 0.277   | 0.001 |
| cg12857957 | chr3:45883621 | LZTFL1 | 0.977   | 0.001 |
| cg05485520 | chr3:45883628 | LZTFL1 | 0.432   | 0.003 |
| cg08186124 | chr3:45883676 | LZTFL1 | 0.915   | 0.000 |
| cg18770816 | chr3:45883693 | LZTFL1 | 0.069   | 0.002 |
| cg21878420 | chr3:45883716 | LZTFL1 | 0.487   | 0.002 |
| cg24259629 | chr3:45883796 | LZTFL1 | 0.076   | 0.002 |
| cg01693650 | chr3:45883855 | LZTFL1 | 0.286   | 0.002 |
| cg15061025 | chr3:45883859 | LZTFL1 | < 0.001 | 0.025 |
| cg04817148 | chr3:45884404 | LZTFL1 | 0.068   | 0.004 |

|               |                 |          |         |       |
|---------------|-----------------|----------|---------|-------|
| cg13426237    | chr3:45884877   | LZTFL1   | 0.800   | 0.001 |
| cg19432791    | chr3:45894556   | LZTFL1   | 0.208   | 0.018 |
| cg00634029    | chr3:45900436   | LZTFL1   | 0.974   | 0.012 |
| cg22850860    | chr3:45902663   | LZTFL1   | 0.014   | 0.021 |
| cg01884851    | chr3:45906498   | LZTFL1   | < 0.001 | 0.113 |
| cg06730002    | chr3:45906856   | LZTFL1   | 0.003   | 0.075 |
| cg09709426    | chr3:45911521   | LZTFL1   | 0.830   | 0.002 |
| cg23890383    | chr3:45913499   | LZTFL1   | < 0.001 | 0.026 |
| cg10650214    | chr3:45914188   | LZTFL1   | 0.166   | 0.015 |
| cg03986594    | chr3:45922512   | LZTFL1   | < 0.001 | 0.061 |
| cg09355011    | chr3:45926450   | LZTFL1   | < 0.001 | 0.047 |
| cg13312303    | chr3:45951308   | LZTFL1   | 0.227   | 0.006 |
| cg25434241    | chr3:45953557   | LZTFL1   | < 0.001 | 0.022 |
| cg03297297    | chr3:45957266   | LZTFL1   | < 0.001 | 0.071 |
| cg25897930    | chr3:45957319   | LZTFL1   | 0.005   | 0.048 |
| cg10418021    | chr3:45957347   | LZTFL1   | < 0.001 | 0.079 |
| cg12924105    | chr3:45957730   | LZTFL1   | < 0.001 | 0.104 |
| cg12988275    | chr3:45958440   | LZTFL1   | 0.444   | 0.002 |
| cg00728099    | chr3:45958469   | LZTFL1   | 0.203   | 0.007 |
| cg20933330    | chr3:45958552   | LZTFL1   | 0.004   | 0.018 |
| cg15634935    | chr13:103347028 | METTL21C | 0.609   | 0.003 |
| cg10371253    | chr13:103347386 | METTL21C | 0.701   | 0.001 |
| cg00530029    | chr13:103348317 | METTL21C | 0.067   | 0.020 |
| cg13407144    | chr10:33468337  | NRP1     | 0.580   | 0.001 |
| ch.10.844982F | chr10:33469591  | NRP1     | 0.033   | 0.002 |
| cg22620273    | chr10:33474766  | NRP1     | 0.756   | 0.001 |
| cg25179876    | chr10:33483109  | NRP1     | 0.035   | 0.048 |
| cg27039218    | chr10:33485389  | NRP1     | 0.381   | 0.004 |
| cg09603237    | chr10:33486310  | NRP1     | 0.948   | 0.001 |
| cg12045634    | chr10:33491867  | NRP1     | 0.262   | 0.008 |
| cg02543939    | chr10:33492000  | NRP1     | 0.082   | 0.005 |
| cg16087345    | chr10:33493031  | NRP1     | 0.347   | 0.005 |
| cg04287203    | chr10:33496604  | NRP1     | 0.231   | 0.004 |
| cg23444399    | chr10:33499848  | NRP1     | 0.057   | 0.008 |
| cg13114217    | chr10:33499997  | NRP1     | 0.925   | 0.000 |
| cg12841561    | chr10:33500134  | NRP1     | 0.588   | 0.006 |
| cg26295541    | chr10:33500231  | NRP1     | 0.094   | 0.006 |
| ch.10.845914F | chr10:33501874  | NRP1     | 0.239   | 0.005 |
| cg00717280    | chr10:33502502  | NRP1     | 0.539   | 0.002 |
| cg14982967    | chr10:33502525  | NRP1     | 0.257   | 0.004 |
| cg26086245    | chr10:33502540  | NRP1     | 0.689   | 0.002 |
| cg06512724    | chr10:33502889  | NRP1     | 0.061   | 0.007 |
| cg05504719    | chr10:33503366  | NRP1     | 0.002   | 0.028 |
| cg01874729    | chr10:33503472  | NRP1     | 0.036   | 0.006 |
| cg23912035    | chr10:33505747  | NRP1     | 0.886   | 0.001 |
| cg20687152    | chr10:33507026  | NRP1     | 0.095   | 0.005 |



|            |                |      |         |       |
|------------|----------------|------|---------|-------|
| cg09277467 | chr10:33512002 | NRP1 | 0.007   | 0.019 |
| cg06338245 | chr10:33515103 | NRP1 | 0.403   | 0.003 |
| cg24638819 | chr10:33515115 | NRP1 | 0.880   | 0.000 |
| cg04721557 | chr10:33515198 | NRP1 | 0.525   | 0.001 |
| cg14219813 | chr10:33515236 | NRP1 | 0.643   | 0.004 |
| cg15809806 | chr10:33518295 | NRP1 | 0.009   | 0.008 |
| cg08358427 | chr10:33522703 | NRP1 | 0.604   | 0.004 |
| cg03442322 | chr10:33524393 | NRP1 | 0.094   | 0.007 |
| cg25763127 | chr10:33527263 | NRP1 | 0.519   | 0.002 |
| cg20701074 | chr10:33532360 | NRP1 | 0.082   | 0.007 |
| cg00346755 | chr10:33534164 | NRP1 | 0.610   | 0.004 |
| cg02977812 | chr10:33537894 | NRP1 | < 0.001 | 0.003 |
| cg21379625 | chr10:33538715 | NRP1 | < 0.001 | 0.051 |
| cg09030553 | chr10:33538770 | NRP1 | 0.981   | 0.000 |
| cg15391489 | chr10:33539640 | NRP1 | 0.330   | 0.004 |
| cg07913781 | chr10:33541110 | NRP1 | 0.097   | 0.006 |
| cg03602698 | chr10:33542985 | NRP1 | 0.733   | 0.001 |
| cg17470096 | chr10:33546865 | NRP1 | 0.718   | 0.001 |
| cg08839819 | chr10:33547946 | NRP1 | 0.493   | 0.002 |
| cg12622378 | chr10:33552748 | NRP1 | 0.227   | 0.004 |
| cg09084320 | chr10:33553435 | NRP1 | 0.821   | 0.001 |
| cg10419493 | chr10:33561323 | NRP1 | 0.755   | 0.001 |
| cg24892069 | chr10:33562205 | NRP1 | 0.418   | 0.026 |
| cg17812637 | chr10:33562403 | NRP1 | 0.678   | 0.014 |
| cg11345700 | chr10:33565458 | NRP1 | 0.081   | 0.005 |
| cg03473377 | chr10:33568029 | NRP1 | 0.702   | 0.005 |
| cg16131207 | chr10:33575017 | NRP1 | 0.029   | 0.020 |
| cg17706662 | chr10:33576866 | NRP1 | 0.031   | 0.016 |
| cg20330217 | chr10:33578803 | NRP1 | 0.637   | 0.002 |
| cg25713793 | chr10:33590732 | NRP1 | 0.127   | 0.010 |
| cg03935991 | chr10:33592746 | NRP1 | 0.157   | 0.008 |
| cg05989059 | chr10:33594454 | NRP1 | 0.132   | 0.007 |
| cg14965866 | chr10:33596300 | NRP1 | 0.060   | 0.011 |
| cg22279720 | chr10:33603872 | NRP1 | < 0.001 | 0.057 |
| cg10312802 | chr10:33604657 | NRP1 | 0.119   | 0.005 |
| cg21998542 | chr10:33605101 | NRP1 | 0.832   | 0.005 |
| cg12054892 | chr10:33607723 | NRP1 | 0.072   | 0.030 |
| cg05293915 | chr10:33608477 | NRP1 | 0.995   | 0.000 |
| cg24517944 | chr10:33608887 | NRP1 | 0.073   | 0.006 |
| cg19131541 | chr10:33608914 | NRP1 | 0.719   | 0.006 |
| cg17425818 | chr10:33612892 | NRP1 | 0.004   | 0.057 |
| cg06898048 | chr10:33614690 | NRP1 | 0.015   | 0.025 |
| cg06859734 | chr10:33617564 | NRP1 | 0.588   | 0.005 |
| cg25733480 | chr10:33619701 | NRP1 | 0.073   | 0.004 |
| cg13090418 | chr10:33621421 | NRP1 | 0.571   | 0.016 |
| cg27270412 | chr10:33622332 | NRP1 | 0.942   | 0.001 |

|            |                 |      |         |       |
|------------|-----------------|------|---------|-------|
| cg07233135 | chr10:33623121  | NRP1 | 0.295   | 0.003 |
| cg20827580 | chr10:33623389  | NRP1 | 0.627   | 0.001 |
| cg23313663 | chr10:33623410  | NRP1 | 0.593   | 0.001 |
| cg17026287 | chr10:33623747  | NRP1 | 0.536   | 0.000 |
| cg13779055 | chr10:33623762  | NRP1 | 0.845   | 0.000 |
| cg23198568 | chr10:33623905  | NRP1 | 0.723   | 0.001 |
| cg09009410 | chr10:33624100  | NRP1 | 0.576   | 0.001 |
| cg13186597 | chr10:33624123  | NRP1 | 0.503   | 0.002 |
| cg00826728 | chr10:33624131  | NRP1 | 0.276   | 0.003 |
| cg12870705 | chr10:33624623  | NRP1 | 0.035   | 0.002 |
| cg09365847 | chr10:33624868  | NRP1 | 0.977   | 0.000 |
| cg24892156 | chr10:33625310  | NRP1 | 0.690   | 0.006 |
| cg09151598 | chr12:113343409 | OAS1 | 0.211   | 0.010 |
| cg17445535 | chr12:113343413 | OAS1 | 0.537   | 0.003 |
| cg25668626 | chr12:113343603 | OAS1 | 0.549   | 0.003 |
| cg24189072 | chr12:113344374 | OAS1 | 0.119   | 0.003 |
| cg13483603 | chr12:113344754 | OAS1 | 0.027   | 0.002 |
| cg19789466 | chr12:113344923 | OAS1 | 0.761   | 0.015 |
| cg04951822 | chr12:113345598 | OAS1 | 0.836   | 0.001 |
| cg06168856 | chr12:113346982 | OAS1 | < 0.001 | 0.068 |
| cg21197031 | chr12:113354037 | OAS1 | 0.811   | 0.000 |
| cg04708790 | chr12:113355675 | OAS1 | 0.756   | 0.005 |
| cg19609748 | chr12:113356835 | OAS1 | 0.982   | 0.000 |
| cg12877361 | chr12:113356935 | OAS1 | 0.544   | 0.009 |
| cg21730677 | chr12:113357028 | OAS1 | 0.985   | 0.000 |
| cg18217049 | chr12:113357226 | OAS1 | 0.725   | 0.002 |
| cg20726456 | chr12:113415459 | OAS2 | 0.009   | 0.019 |
| cg19371652 | chr12:113415883 | OAS2 | 0.833   | 0.002 |
| cg11601443 | chr12:113415930 | OAS2 | 0.092   | 0.013 |
| cg04880620 | chr12:113415945 | OAS2 | 0.469   | 0.007 |
| cg03996150 | chr12:113416055 | OAS2 | 0.859   | 0.001 |
| cg12560128 | chr12:113416061 | OAS2 | 0.588   | 0.001 |
| cg11318133 | chr12:113416268 | OAS2 | 0.107   | 0.004 |
| cg00175901 | chr12:113416290 | OAS2 | 0.003   | 0.003 |
| cg00085448 | chr12:113416442 | OAS2 | 0.908   | 0.002 |
| cg20870559 | chr12:113416518 | OAS2 | 0.798   | 0.001 |
| cg16399664 | chr12:113417284 | OAS2 | 0.748   | 0.001 |
| cg16366376 | chr12:113425484 | OAS2 | 0.486   | 0.002 |
| cg06255132 | chr12:113426510 | OAS2 | 0.986   | 0.000 |
| cg12247536 | chr12:113428107 | OAS2 | 0.899   | 0.000 |
| cg03320783 | chr12:113430736 | OAS2 | 0.553   | 0.017 |
| cg06217905 | chr12:113435438 | OAS2 | 0.744   | 0.002 |
| cg16382882 | chr12:113435923 | OAS2 | 0.164   | 0.004 |
| cg25682386 | chr12:113435980 | OAS2 | 0.713   | 0.002 |
| cg06154315 | chr12:113436953 | OAS2 | 0.637   | 0.011 |
| cg24531077 | chr12:113440283 | OAS2 | 0.773   | 0.007 |

|            |                 |       |         |       |
|------------|-----------------|-------|---------|-------|
| cg20800221 | chr12:113443790 | OAS2  | 0.603   | 0.003 |
| cg03210276 | chr12:113445157 | OAS2  | 0.009   | 0.011 |
| cg07253769 | chr12:113447342 | OAS2  | 0.571   | 0.008 |
| cg03240232 | chr12:113448327 | OAS2  | 0.034   | 0.020 |
| cg08147692 | chr12:113375402 | OAS3  | 0.299   | 0.003 |
| cg22447989 | chr12:113375561 | OAS3  | 0.026   | 0.046 |
| cg22260958 | chr12:113375880 | OAS3  | 0.317   | 0.010 |
| cg25800166 | chr12:113375896 | OAS3  | 0.805   | 0.004 |
| cg24515746 | chr12:113375961 | OAS3  | 0.015   | 0.016 |
| cg25319449 | chr12:113376135 | OAS3  | 0.856   | 0.000 |
| cg01128221 | chr12:113376260 | OAS3  | 0.950   | 0.001 |
| cg22026360 | chr12:113376264 | OAS3  | 0.448   | 0.001 |
| cg18120998 | chr12:113376286 | OAS3  | 0.937   | 0.000 |
| cg16458507 | chr12:113376293 | OAS3  | 0.092   | 0.005 |
| cg03331867 | chr12:113376492 | OAS3  | 0.444   | 0.003 |
| cg20102336 | chr12:113376681 | OAS3  | 0.637   | 0.002 |
| cg09167772 | chr12:113377933 | OAS3  | 0.612   | 0.001 |
| cg27066543 | chr12:113381877 | OAS3  | 0.443   | 0.002 |
| cg24948564 | chr12:113384576 | OAS3  | 0.132   | 0.009 |
| cg25297038 | chr12:113386963 | OAS3  | 0.867   | 0.001 |
| cg11236111 | chr12:113402109 | OAS3  | 0.356   | 0.002 |
| cg11229468 | chr12:113405865 | OAS3  | 0.781   | 0.001 |
| cg22044401 | chr12:113405926 | OAS3  | 0.469   | 0.002 |
| cg18448515 | chr12:113406128 | OAS3  | 0.183   | 0.004 |
| cg02066269 | chr5:76505273   | PDE8B | 0.184   | 0.008 |
| cg08967003 | chr5:76505571   | PDE8B | 0.809   | 0.000 |
| cg23942789 | chr5:76505840   | PDE8B | 0.010   | 0.014 |
| cg06339657 | chr5:76505932   | PDE8B | 0.599   | 0.005 |
| cg25373100 | chr5:76506484   | PDE8B | 0.208   | 0.001 |
| cg02329935 | chr5:76506492   | PDE8B | 0.119   | 0.001 |
| cg13554086 | chr5:76507100   | PDE8B | 0.824   | 0.000 |
| cg06025835 | chr5:76507298   | PDE8B | 0.034   | 0.006 |
| cg16461538 | chr5:76507484   | PDE8B | 0.095   | 0.004 |
| cg22203582 | chr5:76507680   | PDE8B | < 0.001 | 0.011 |
| cg13077359 | chr5:76512781   | PDE8B | 0.201   | 0.005 |
| cg01676318 | chr5:76514167   | PDE8B | 0.061   | 0.012 |
| cg21060420 | chr5:76520875   | PDE8B | 0.613   | 0.005 |
| cg16812042 | chr5:76527030   | PDE8B | 0.001   | 0.023 |
| cg14878361 | chr5:76527359   | PDE8B | < 0.001 | 0.033 |
| cg15788355 | chr5:76535026   | PDE8B | < 0.001 | 0.054 |
| cg08189790 | chr5:76547849   | PDE8B | 0.231   | 0.006 |
| cg19829058 | chr5:76549927   | PDE8B | 0.039   | 0.013 |
| cg11062417 | chr5:76578232   | PDE8B | 0.054   | 0.011 |
| cg19436353 | chr5:76586024   | PDE8B | 0.580   | 0.002 |
| cg13003600 | chr5:76586623   | PDE8B | 0.107   | 0.014 |
| cg15375344 | chr5:76598038   | PDE8B | 0.776   | 0.002 |

|               |                |          |         |       |
|---------------|----------------|----------|---------|-------|
| cg08281791    | chr5:76607845  | PDE8B    | 0.845   | 0.002 |
| cg10292028    | chr5:76621420  | PDE8B    | 0.735   | 0.001 |
| cg26964901    | chr5:76630355  | PDE8B    | 0.005   | 0.013 |
| cg04307776    | chr5:76652757  | PDE8B    | 0.439   | 0.015 |
| cg18631313    | chr5:76653473  | PDE8B    | 0.541   | 0.003 |
| cg12559197    | chr5:76654783  | PDE8B    | 0.010   | 0.062 |
| cg17430199    | chr5:76663105  | PDE8B    | 0.695   | 0.009 |
| cg20872940    | chr5:76663728  | PDE8B    | < 0.001 | 0.051 |
| cg16334075    | chr5:76670503  | PDE8B    | 0.017   | 0.010 |
| cg26357116    | chr5:76675528  | PDE8B    | 0.015   | 0.049 |
| cg10189799    | chr5:76686823  | PDE8B    | 0.998   | 0.002 |
| cg11460929    | chr5:76690047  | PDE8B    | 0.974   | 0.000 |
| cg19701224    | chr5:76704767  | PDE8B    | 0.718   | 0.001 |
| cg03195910    | chr5:76704995  | PDE8B    | 0.337   | 0.009 |
| cg01035629    | chr5:76705019  | PDE8B    | 0.223   | 0.006 |
| cg22011212    | chr5:76706050  | PDE8B    | 0.717   | 0.010 |
| cg13714288    | chr5:76713158  | PDE8B    | 0.063   | 0.012 |
| cg03695340    | chr5:76721970  | PDE8B    | 0.401   | 0.003 |
| cg05010493    | chr5:76722964  | PDE8B    | 0.628   | 0.002 |
| ch.5.1450929R | chr5:76723053  | PDE8B    | 0.509   | 0.003 |
| cg15219523    | chr2:209129921 | PIKFYVE  | 0.562   | 0.011 |
| cg03701609    | chr2:209129993 | PIKFYVE  | 0.258   | 0.015 |
| cg02669268    | chr2:209130300 | PIKFYVE  | 0.799   | 0.001 |
| cg09509267    | chr2:209130442 | PIKFYVE  | 0.858   | 0.010 |
| cg03378289    | chr2:209130693 | PIKFYVE  | 0.437   | 0.001 |
| cg01046174    | chr2:209130700 | PIKFYVE  | 0.866   | 0.000 |
| cg00707300    | chr2:209130779 | PIKFYVE  | 0.707   | 0.001 |
| cg24830471    | chr2:209130825 | PIKFYVE  | 0.830   | 0.001 |
| cg24987806    | chr2:209130885 | PIKFYVE  | 0.623   | 0.003 |
| cg15399923    | chr2:209130889 | PIKFYVE  | 0.954   | 0.000 |
| cg09615745    | chr2:209130978 | PIKFYVE  | 0.071   | 0.001 |
| cg25064853    | chr2:209131103 | PIKFYVE  | 0.394   | 0.002 |
| cg05268564    | chr2:209131274 | PIKFYVE  | 0.153   | 0.003 |
| cg02241586    | chr2:209131508 | PIKFYVE  | 0.897   | 0.000 |
| cg19351166    | chr2:209133632 | PIKFYVE  | 0.630   | 0.012 |
| cg11969526    | chr2:209145835 | PIKFYVE  | 0.044   | 0.008 |
| cg24476365    | chr2:209163171 | PIKFYVE  | 0.062   | 0.038 |
| cg03065139    | chr2:209169833 | PIKFYVE  | 0.365   | 0.008 |
| cg18100085    | chr2:209176730 | PIKFYVE  | < 0.001 | 0.022 |
| cg10725403    | chr2:209180074 | PIKFYVE  | 0.851   | 0.003 |
| cg03671627    | chr2:209185667 | PIKFYVE  | 0.856   | 0.006 |
| cg24468036    | chr2:209197652 | PIKFYVE  | 0.030   | 0.016 |
| cg08621874    | chr2:209198208 | PIKFYVE  | 0.518   | 0.002 |
| cg00273392    | chr2:209198437 | PIKFYVE  | 0.005   | 0.011 |
| cg27443844    | chr2:209206217 | PIKFYVE  | 0.802   | 0.001 |
| cg24539923    | chr7:100769903 | SERPINE1 | 0.956   | 0.000 |

|            |                |          |         |       |
|------------|----------------|----------|---------|-------|
| cg19722814 | chr7:100769933 | SERPINE1 | 0.003   | 0.010 |
| cg25826546 | chr7:100770060 | SERPINE1 | 0.179   | 0.004 |
| cg20438404 | chr7:100770192 | SERPINE1 | 0.708   | 0.001 |
| cg08506775 | chr7:100770286 | SERPINE1 | 0.003   | 0.013 |
| cg02273392 | chr7:100770414 | SERPINE1 | 0.466   | 0.002 |
| cg15874872 | chr7:100770434 | SERPINE1 | 0.075   | 0.005 |
| cg20583316 | chr7:100770476 | SERPINE1 | 0.999   | 0.000 |
| cg01971264 | chr7:100773079 | SERPINE1 | 0.061   | 0.012 |
| cg08792542 | chr7:100773718 | SERPINE1 | 0.356   | 0.005 |
| cg12584355 | chr7:100773851 | SERPINE1 | 0.170   | 0.006 |
| cg11353706 | chr7:100774810 | SERPINE1 | 0.568   | 0.006 |
| cg01975495 | chr7:100779017 | SERPINE1 | 0.063   | 0.024 |
| cg02704552 | chr7:100781178 | SERPINE1 | 0.445   | 0.008 |
| cg04746914 | chr3:45797767  | SLC6A20  | 0.223   | 0.010 |
| cg01451880 | chr3:45801044  | SLC6A20  | 0.061   | 0.003 |
| cg09251680 | chr3:45801144  | SLC6A20  | 0.889   | 0.000 |
| cg07430193 | chr3:45801965  | SLC6A20  | 0.259   | 0.012 |
| cg02414266 | chr3:45802101  | SLC6A20  | 0.500   | 0.010 |
| cg17323778 | chr3:45803563  | SLC6A20  | 0.280   | 0.006 |
| cg25727101 | chr3:45804291  | SLC6A20  | 0.011   | 0.011 |
| cg01147011 | chr3:45807290  | SLC6A20  | 0.016   | 0.007 |
| cg05403822 | chr3:45807402  | SLC6A20  | 0.003   | 0.030 |
| cg26339753 | chr3:45807440  | SLC6A20  | 0.088   | 0.005 |
| cg01311379 | chr3:45807578  | SLC6A20  | 0.206   | 0.012 |
| cg04709528 | chr3:45807687  | SLC6A20  | 0.166   | 0.010 |
| cg25344330 | chr3:45807712  | SLC6A20  | 0.647   | 0.001 |
| cg26208450 | chr3:45813982  | SLC6A20  | 0.969   | 0.000 |
| cg07606990 | chr3:45814035  | SLC6A20  | 0.072   | 0.009 |
| cg26643209 | chr3:45818166  | SLC6A20  | 0.584   | 0.005 |
| cg24261921 | chr3:45821484  | SLC6A20  | 0.462   | 0.004 |
| cg27269492 | chr3:45821536  | SLC6A20  | 0.630   | 0.005 |
| cg00256353 | chr3:45823127  | SLC6A20  | 0.188   | 0.011 |
| cg07288822 | chr3:45825528  | SLC6A20  | 0.133   | 0.004 |
| cg15576918 | chr3:45834369  | SLC6A20  | < 0.001 | 0.034 |
| cg04491419 | chr3:45835519  | SLC6A20  | 0.045   | 0.008 |
| cg05461503 | chr3:45837170  | SLC6A20  | 0.062   | 0.025 |
| cg24940967 | chr3:45837197  | SLC6A20  | 0.646   | 0.010 |
| cg12359315 | chr3:45837458  | SLC6A20  | 0.379   | 0.002 |
| cg20953187 | chr3:45837898  | SLC6A20  | 0.010   | 0.004 |
| cg09700085 | chr3:45838028  | SLC6A20  | 0.013   | 0.018 |
| cg04970117 | chr3:45838037  | SLC6A20  | 0.861   | 0.000 |
| cg02716516 | chr3:45838074  | SLC6A20  | 0.318   | 0.001 |
| cg20829379 | chr3:45838083  | SLC6A20  | 0.843   | 0.000 |
| cg25924911 | chr3:45838094  | SLC6A20  | 0.509   | 0.001 |
| cg22497313 | chr3:45838198  | SLC6A20  | 0.061   | 0.005 |
| cg08826127 | chr3:45838226  | SLC6A20  | 0.988   | 0.000 |

|            |                |         |         |       |
|------------|----------------|---------|---------|-------|
| cg16309260 | chr3:45838338  | SLC6A20 | 0.001   | 0.021 |
| cg04012198 | chr3:45838475  | SLC6A20 | 0.218   | 0.014 |
| cg17165824 | chr3:45838670  | SLC6A20 | 0.981   | 0.000 |
| cg13719314 | chr3:45839377  | SLC6A20 | 0.014   | 0.024 |
| cg12944551 | chr2:191839759 | STAT1   | 0.003   | 0.017 |
| cg17486692 | chr2:191839947 | STAT1   | 0.922   | 0.001 |
| cg22595870 | chr2:191840398 | STAT1   | 0.181   | 0.004 |
| cg21683635 | chr2:191841735 | STAT1   | 0.240   | 0.005 |
| cg00467636 | chr2:191842259 | STAT1   | 0.169   | 0.005 |
| cg03496077 | chr2:191842287 | STAT1   | 0.129   | 0.005 |
| cg08946713 | chr2:191844998 | STAT1   | < 0.001 | 0.065 |
| cg24308210 | chr2:191848451 | STAT1   | 0.172   | 0.003 |
| cg00137918 | chr2:191850909 | STAT1   | 0.220   | 0.004 |
| cg19881581 | chr2:191859930 | STAT1   | 0.349   | 0.003 |
| cg10311754 | chr2:191861148 | STAT1   | 0.448   | 0.002 |
| cg13444194 | chr2:191872935 | STAT1   | 0.826   | 0.002 |
| cg07599830 | chr2:191873753 | STAT1   | 0.140   | 0.006 |
| cg25714134 | chr2:191873795 | STAT1   | 0.303   | 0.003 |
| cg16380614 | chr2:191874140 | STAT1   | 0.297   | 0.004 |
| cg14951497 | chr2:191875807 | STAT1   | 0.002   | 0.039 |
| cg00676801 | chr2:191876673 | STAT1   | 0.001   | 0.051 |
| cg18761133 | chr2:191878353 | STAT1   | 0.504   | 0.006 |
| cg26038976 | chr2:191878357 | STAT1   | 0.005   | 0.003 |
| cg24997845 | chr2:191878460 | STAT1   | 0.102   | 0.004 |
| cg01085225 | chr2:191878686 | STAT1   | 0.335   | 0.001 |
| cg25856179 | chr2:191878705 | STAT1   | 0.036   | 0.001 |
| cg11065262 | chr2:191878861 | STAT1   | 0.495   | 0.003 |
| cg25579739 | chr2:191878969 | STAT1   | 0.085   | 0.001 |
| cg11255154 | chr2:191879104 | STAT1   | 0.524   | 0.006 |
| cg07052015 | chr2:191879114 | STAT1   | 0.728   | 0.001 |
| cg00493400 | chr2:191879127 | STAT1   | 0.354   | 0.001 |
| cg21968799 | chr2:191879152 | STAT1   | 0.889   | 0.000 |
| cg19050596 | chr2:191879164 | STAT1   | 0.726   | 0.001 |
| cg18766080 | chr2:191879342 | STAT1   | 0.906   | 0.002 |
| cg22833204 | chr2:191879510 | STAT1   | 0.024   | 0.032 |
| cg12159504 | chr2:191879541 | STAT1   | 0.980   | 0.003 |
| cg07730886 | chr2:191879796 | STAT1   | 0.037   | 0.010 |
| cg07780782 | chr17:40465546 | STAT3   | < 0.001 | 0.041 |
| cg11264678 | chr17:40466210 | STAT3   | 0.003   | 0.045 |
| cg25330422 | chr17:40467382 | STAT3   | 0.024   | 0.042 |
| cg04949579 | chr17:40469283 | STAT3   | 0.014   | 0.013 |
| cg18852825 | chr17:40469642 | STAT3   | 0.043   | 0.017 |
| cg06769931 | chr17:40470564 | STAT3   | 0.002   | 0.015 |
| cg22128509 | chr17:40474338 | STAT3   | 0.934   | 0.001 |
| cg26107598 | chr17:40474351 | STAT3   | 0.088   | 0.006 |
| cg22197416 | chr17:40474492 | STAT3   | 0.390   | 0.005 |

|            |                |       |         |       |
|------------|----------------|-------|---------|-------|
| cg02206695 | chr17:40474743 | STAT3 | 0.894   | 0.000 |
| cg04439252 | chr17:40475282 | STAT3 | 0.042   | 0.021 |
| cg08308989 | chr17:40476724 | STAT3 | 0.480   | 0.004 |
| cg03647657 | chr17:40477020 | STAT3 | 0.688   | 0.002 |
| cg00476906 | chr17:40477266 | STAT3 | 0.001   | 0.015 |
| cg06903086 | chr17:40481955 | STAT3 | 0.923   | 0.001 |
| cg03164379 | chr17:40483184 | STAT3 | 0.818   | 0.014 |
| cg00508048 | chr17:40485194 | STAT3 | 0.004   | 0.018 |
| cg02776195 | chr17:40486927 | STAT3 | 0.121   | 0.007 |
| cg08652441 | chr17:40489513 | STAT3 | < 0.001 | 0.055 |
| cg05487134 | chr17:40489569 | STAT3 | 0.001   | 0.072 |
| cg24312520 | chr17:40489584 | STAT3 | 0.001   | 0.075 |
| cg24718015 | chr17:40489721 | STAT3 | 0.585   | 0.002 |
| cg17833746 | chr17:40489785 | STAT3 | 0.001   | 0.048 |
| cg19438966 | chr17:40491386 | STAT3 | < 0.001 | 0.016 |
| cg01763935 | chr17:40493229 | STAT3 | < 0.001 | 0.057 |
| cg25745154 | chr17:40493923 | STAT3 | 0.224   | 0.009 |
| cg25867318 | chr17:40494745 | STAT3 | 0.733   | 0.008 |
| cg01619417 | chr17:40507235 | STAT3 | 0.023   | 0.055 |
| cg08965162 | chr17:40507919 | STAT3 | 0.468   | 0.005 |
| cg12873903 | chr17:40514805 | STAT3 | 0.376   | 0.003 |
| cg06270615 | chr17:40516068 | STAT3 | 0.127   | 0.015 |
| cg17748242 | chr17:40517479 | STAT3 | 0.151   | 0.003 |
| cg15764884 | chr17:40521020 | STAT3 | 0.705   | 0.002 |
| cg06350351 | chr17:40526246 | STAT3 | < 0.001 | 0.012 |
| cg17283534 | chr17:40530242 | STAT3 | 0.876   | 0.001 |
| cg04598300 | chr17:40531272 | STAT3 | 0.041   | 0.006 |
| cg25857307 | chr17:40536562 | STAT3 | 0.963   | 0.000 |
| cg11897378 | chr17:40539235 | STAT3 | 0.002   | 0.018 |
| cg07736922 | chr17:40539702 | STAT3 | 0.003   | 0.004 |
| cg03131395 | chr17:40540099 | STAT3 | 0.212   | 0.002 |
| cg18112163 | chr17:40540197 | STAT3 | 0.298   | 0.001 |
| cg09804439 | chr17:40540457 | STAT3 | 0.749   | 0.000 |
| cg06378498 | chr17:40540460 | STAT3 | 0.780   | 0.000 |
| cg19557623 | chr17:40540543 | STAT3 | 0.748   | 0.001 |
| cg15704988 | chr17:40540562 | STAT3 | 0.613   | 0.001 |
| cg04517036 | chr17:40540569 | STAT3 | 0.834   | 0.000 |
| cg01337508 | chr17:40540572 | STAT3 | 0.448   | 0.003 |
| cg07158701 | chr17:40540601 | STAT3 | 0.857   | 0.001 |
| cg17411949 | chr17:40540650 | STAT3 | 0.858   | 0.001 |
| cg13655938 | chr17:40540819 | STAT3 | 0.930   | 0.001 |
| cg09476841 | chr17:40540860 | STAT3 | 0.681   | 0.001 |
| cg04076832 | chr17:40540865 | STAT3 | 0.005   | 0.006 |
| cg20716209 | chr17:40541270 | STAT3 | 0.255   | 0.001 |
| cg07322015 | chr17:40541283 | STAT3 | 0.969   | 0.000 |
| cg03372410 | chr2:168811754 | STK39 | 0.879   | 0.002 |

|            |                |       |         |       |
|------------|----------------|-------|---------|-------|
| cg21032473 | chr2:168818347 | STK39 | 0.151   | 0.003 |
| cg01298735 | chr2:168821882 | STK39 | 0.140   | 0.005 |
| cg19848140 | chr2:168822706 | STK39 | < 0.001 | 0.038 |
| cg08559214 | chr2:168839903 | STK39 | 0.038   | 0.007 |
| cg07319162 | chr2:168843898 | STK39 | 0.946   | 0.000 |
| cg06067477 | chr2:168844818 | STK39 | 0.021   | 0.013 |
| cg07903472 | chr2:168846657 | STK39 | 0.550   | 0.004 |
| cg08774104 | chr2:168854864 | STK39 | 0.069   | 0.007 |
| cg08568260 | chr2:168858485 | STK39 | 0.002   | 0.018 |
| cg17020782 | chr2:168869861 | STK39 | 0.938   | 0.000 |
| cg17674892 | chr2:168869998 | STK39 | < 0.001 | 0.043 |
| cg08262269 | chr2:168877862 | STK39 | 0.007   | 0.008 |
| cg06990256 | chr2:168883365 | STK39 | 0.300   | 0.003 |
| cg12853654 | chr2:168883913 | STK39 | 0.015   | 0.013 |
| cg05753044 | chr2:168884280 | STK39 | 0.655   | 0.001 |
| cg09897958 | chr2:168887429 | STK39 | 0.795   | 0.001 |
| cg08362162 | chr2:168898872 | STK39 | 0.276   | 0.011 |
| cg19694335 | chr2:168906876 | STK39 | 0.023   | 0.008 |
| cg05998565 | chr2:168907444 | STK39 | 0.063   | 0.022 |
| cg13345122 | chr2:168912885 | STK39 | 0.640   | 0.010 |
| cg14787753 | chr2:168917992 | STK39 | 0.094   | 0.006 |
| cg03177034 | chr2:168921027 | STK39 | 0.531   | 0.001 |
| cg11328284 | chr2:168932113 | STK39 | 0.176   | 0.044 |
| cg02619264 | chr2:168942650 | STK39 | 0.393   | 0.003 |
| cg19026692 | chr2:168947421 | STK39 | 0.475   | 0.009 |
| cg24867784 | chr2:168964414 | STK39 | 0.089   | 0.003 |
| cg10987981 | chr2:168969276 | STK39 | 0.059   | 0.007 |
| cg05478553 | chr2:168970426 | STK39 | 0.014   | 0.015 |
| cg10123669 | chr2:168970900 | STK39 | 0.188   | 0.047 |
| cg26671568 | chr2:168973489 | STK39 | 0.052   | 0.008 |
| cg02537014 | chr2:168974265 | STK39 | 0.002   | 0.009 |
| cg26970032 | chr2:168994440 | STK39 | 0.414   | 0.008 |
| cg03351487 | chr2:169003820 | STK39 | 0.149   | 0.050 |
| cg16875057 | chr2:169006003 | STK39 | < 0.001 | 0.055 |
| cg12367789 | chr2:169012049 | STK39 | 0.102   | 0.004 |
| cg09857870 | chr2:169012428 | STK39 | 0.648   | 0.012 |
| cg03414543 | chr2:169013814 | STK39 | 0.514   | 0.003 |
| cg12059950 | chr2:169017661 | STK39 | 0.009   | 0.027 |
| cg08054187 | chr2:169018258 | STK39 | 0.033   | 0.011 |
| cg27660720 | chr2:169023572 | STK39 | 0.853   | 0.005 |
| cg10150255 | chr2:169025365 | STK39 | 0.150   | 0.011 |
| cg06754557 | chr2:169025892 | STK39 | 0.470   | 0.004 |
| cg22585786 | chr2:169037808 | STK39 | 0.003   | 0.015 |
| cg22359623 | chr2:169038705 | STK39 | 0.202   | 0.004 |
| cg03792447 | chr2:169041897 | STK39 | 0.898   | 0.007 |
| cg20661391 | chr2:169048192 | STK39 | 0.077   | 0.004 |



|            |                |       |         |       |
|------------|----------------|-------|---------|-------|
| cg11968742 | chr2:169050271 | STK39 | 0.049   | 0.018 |
| cg12682817 | chr2:169051315 | STK39 | 0.001   | 0.021 |
| cg26164761 | chr2:169055243 | STK39 | 0.030   | 0.061 |
| cg07992385 | chr2:169058521 | STK39 | < 0.001 | 0.045 |
| cg08795597 | chr2:169059614 | STK39 | 0.032   | 0.012 |
| cg10016283 | chr2:169065139 | STK39 | 0.091   | 0.009 |
| cg17252489 | chr2:169069249 | STK39 | 0.136   | 0.018 |
| cg08240917 | chr2:169071559 | STK39 | 0.934   | 0.001 |
| cg13431028 | chr2:169073609 | STK39 | 0.057   | 0.006 |
| cg06501606 | chr2:169077032 | STK39 | 0.057   | 0.005 |
| cg15310214 | chr2:169078031 | STK39 | 0.417   | 0.002 |
| cg24083378 | chr2:169079247 | STK39 | 0.345   | 0.003 |
| cg21899461 | chr2:169097849 | STK39 | 0.001   | 0.060 |
| cg11775828 | chr2:169100915 | STK39 | < 0.001 | 0.055 |
| cg24695024 | chr2:169101015 | STK39 | < 0.001 | 0.063 |
| cg03331300 | chr2:169102866 | STK39 | 0.722   | 0.000 |
| cg02114728 | chr2:169102929 | STK39 | 0.473   | 0.002 |
| cg22401940 | chr2:169103153 | STK39 | 0.047   | 0.006 |
| cg23092844 | chr2:169103738 | STK39 | 0.482   | 0.001 |
| cg07857142 | chr2:169103971 | STK39 | 0.372   | 0.001 |
| cg21871154 | chr2:169104283 | STK39 | 0.698   | 0.000 |
| cg19282745 | chr2:169104342 | STK39 | 0.976   | 0.001 |
| cg02689023 | chr2:169104449 | STK39 | 0.014   | 0.003 |
| cg24498376 | chr2:169104453 | STK39 | 0.108   | 0.002 |
| cg26872305 | chr2:169104523 | STK39 | 0.684   | 0.001 |
| cg22659356 | chr2:169104591 | STK39 | 0.209   | 0.003 |
| cg08487618 | chr2:169104715 | STK39 | < 0.001 | 0.035 |
| cg10055458 | chr2:169104734 | STK39 | 0.007   | 0.017 |
| cg03867702 | chr2:169104828 | STK39 | 0.005   | 0.042 |
| cg22872692 | chr2:169104856 | STK39 | 0.042   | 0.025 |
| cg18147479 | chr2:169105070 | STK39 | 0.655   | 0.010 |
| cg23178697 | chr2:169105091 | STK39 | 0.188   | 0.014 |
| cg18370778 | chr12:64845191 | TBK1  | 0.001   | 0.049 |
| cg01859195 | chr12:64845239 | TBK1  | < 0.001 | 0.059 |
| cg06092729 | chr12:64845451 | TBK1  | 0.006   | 0.023 |
| cg04466273 | chr12:64845556 | TBK1  | 0.637   | 0.001 |
| cg22499688 | chr12:64845600 | TBK1  | 0.504   | 0.002 |
| cg04671518 | chr12:64845608 | TBK1  | 0.577   | 0.001 |
| cg27083278 | chr12:64845641 | TBK1  | 0.155   | 0.004 |
| cg10074892 | chr12:64845717 | TBK1  | 0.901   | 0.000 |
| cg07153406 | chr12:64845733 | TBK1  | 0.015   | 0.004 |
| cg14498209 | chr12:64845763 | TBK1  | 0.784   | 0.001 |
| cg07640083 | chr12:64845769 | TBK1  | 0.813   | 0.001 |
| cg15709784 | chr12:64845926 | TBK1  | 0.043   | 0.001 |
| cg21722680 | chr12:64846210 | TBK1  | 0.399   | 0.001 |
| cg16604658 | chr12:64847188 | TBK1  | 0.005   | 0.045 |

|            |                |        |         |       |
|------------|----------------|--------|---------|-------|
| cg23175599 | chr12:64848891 | TBK1   | 0.971   | 0.001 |
| cg10069609 | chr12:64852389 | TBK1   | 0.100   | 0.007 |
| cg04885749 | chr12:64855513 | TBK1   | < 0.001 | 0.036 |
| cg15343732 | chr12:64862422 | TBK1   | 0.759   | 0.001 |
| cg09902198 | chr12:64877389 | TBK1   | 0.018   | 0.075 |
| cg09999583 | chr12:64878162 | TBK1   | 0.037   | 0.007 |
| cg13540592 | chr12:64889343 | TBK1   | 0.003   | 0.009 |
| cg01089930 | chr12:64890764 | TBK1   | 0.256   | 0.006 |
| cg19796955 | chr12:64895570 | TBK1   | 0.045   | 0.004 |
| cg22510067 | chr2:137747619 | THSD7B | 0.091   | 0.007 |
| cg08084967 | chr2:137747719 | THSD7B | 0.363   | 0.005 |
| cg08967662 | chr2:137747749 | THSD7B | 0.163   | 0.006 |
| cg25714147 | chr2:137747982 | THSD7B | 0.031   | 0.008 |
| cg07412043 | chr2:137748366 | THSD7B | 0.763   | 0.000 |
| cg15750500 | chr2:137748382 | THSD7B | 0.072   | 0.007 |
| cg06848148 | chr2:137748455 | THSD7B | 0.535   | 0.002 |
| cg08231096 | chr2:137748460 | THSD7B | 0.014   | 0.018 |
| cg11746464 | chr2:137748833 | THSD7B | 0.752   | 0.009 |
| cg08222788 | chr2:137754925 | THSD7B | 0.233   | 0.017 |
| cg06745308 | chr2:137755968 | THSD7B | 0.034   | 0.018 |
| cg16561226 | chr2:137808428 | THSD7B | 0.050   | 0.036 |
| cg24449653 | chr2:137813993 | THSD7B | 0.171   | 0.028 |
| cg03897905 | chr2:137814066 | THSD7B | 0.820   | 0.000 |
| cg05764108 | chr2:137814211 | THSD7B | 0.741   | 0.004 |
| cg15834121 | chr2:137814271 | THSD7B | 0.973   | 0.000 |
| cg16579593 | chr2:137814280 | THSD7B | 0.364   | 0.003 |
| cg14255655 | chr2:137891808 | THSD7B | 0.957   | 0.000 |
| cg02375649 | chr2:137912216 | THSD7B | 0.016   | 0.018 |
| cg01103321 | chr2:137913067 | THSD7B | 0.487   | 0.007 |
| cg04578489 | chr2:137913401 | THSD7B | 0.955   | 0.003 |
| cg08633789 | chr2:137913470 | THSD7B | 0.009   | 0.017 |
| cg01709492 | chr2:137921113 | THSD7B | 0.784   | 0.004 |
| cg12906989 | chr2:137925983 | THSD7B | 0.481   | 0.008 |
| cg11737758 | chr2:137931242 | THSD7B | 0.020   | 0.040 |
| cg00743354 | chr2:137935851 | THSD7B | 0.250   | 0.019 |
| cg01439023 | chr2:137936057 | THSD7B | 0.151   | 0.011 |
| cg23554286 | chr2:137951070 | THSD7B | 0.038   | 0.019 |
| cg08200809 | chr2:137959323 | THSD7B | 0.326   | 0.004 |
| cg06319861 | chr2:137964351 | THSD7B | 0.742   | 0.002 |
| cg01086974 | chr2:137986170 | THSD7B | < 0.001 | 0.039 |
| cg13431597 | chr2:137987479 | THSD7B | 0.655   | 0.002 |
| cg04667011 | chr2:138011944 | THSD7B | 0.333   | 0.011 |
| cg05853130 | chr2:138019701 | THSD7B | 0.677   | 0.008 |
| cg25498731 | chr2:138045743 | THSD7B | 0.241   | 0.011 |
| cg25073409 | chr2:138091239 | THSD7B | 0.182   | 0.016 |
| cg22012786 | chr2:138106132 | THSD7B | 0.286   | 0.007 |

|            |                |        |         |       |
|------------|----------------|--------|---------|-------|
| cg05463672 | chr2:138224937 | THSD7B | 0.551   | 0.005 |
| cg03526165 | chr2:138264722 | THSD7B | 0.712   | 0.004 |
| cg11795053 | chr2:138399663 | THSD7B | 0.015   | 0.025 |
| cg17836195 | chr2:138416978 | THSD7B | 0.038   | 0.008 |
| cg21924447 | chr2:138427803 | THSD7B | < 0.001 | 0.038 |
| cg21495956 | chr2:138434773 | THSD7B | 0.527   | 0.006 |
| cg26648758 | chr19:4816176  | TICAM1 | 0.851   | 0.002 |
| cg00351190 | chr19:4816855  | TICAM1 | 0.022   | 0.013 |
| cg10221736 | chr19:4818359  | TICAM1 | 0.931   | 0.000 |
| cg26372557 | chr19:4818615  | TICAM1 | 0.714   | 0.002 |
| cg00423871 | chr19:4827986  | TICAM1 | 0.518   | 0.005 |
| cg02752037 | chr19:4829518  | TICAM1 | < 0.001 | 0.040 |
| cg04674143 | chr19:4831543  | TICAM1 | 0.113   | 0.001 |
| cg22770755 | chr19:4831688  | TICAM1 | 0.679   | 0.001 |
| cg02430562 | chr19:4831721  | TICAM1 | 0.162   | 0.001 |
| cg13119687 | chr19:4831825  | TICAM1 | 0.158   | 0.001 |
| cg02759622 | chr19:4831885  | TICAM1 | 0.585   | 0.001 |
| cg00087799 | chr19:4831891  | TICAM1 | 0.616   | 0.001 |
| cg16722792 | chr19:4831939  | TICAM1 | 0.958   | 0.000 |
| cg23801786 | chr19:4831951  | TICAM1 | 0.494   | 0.003 |
| cg19751098 | chr19:4831974  | TICAM1 | 0.535   | 0.002 |
| cg15457276 | chr19:4832024  | TICAM1 | 0.329   | 0.005 |
| cg19797341 | chr19:4832695  | TICAM1 | 0.037   | 0.013 |
| cg07550579 | chr19:4832918  | TICAM1 | < 0.001 | 0.041 |
| cg07649585 | chr19:4832993  | TICAM1 | 0.931   | 0.003 |
| cg09295300 | chr4:186989025 | TLR3   | 0.304   | 0.005 |
| cg00305797 | chr4:186989236 | TLR3   | 0.631   | 0.018 |
| cg01036205 | chr4:186989523 | TLR3   | 0.732   | 0.005 |
| cg15851014 | chr4:186989764 | TLR3   | 0.903   | 0.016 |
| cg06498520 | chr4:186990006 | TLR3   | 0.010   | 0.014 |
| cg17671280 | chr4:186990202 | TLR3   | 0.244   | 0.010 |
| cg25367691 | chr4:186990324 | TLR3   | < 0.001 | 0.010 |
| cg12697789 | chr4:186990425 | TLR3   | 0.923   | 0.000 |
| cg11273820 | chr4:187002591 | TLR3   | 0.474   | 0.005 |
| cg14827929 | chr4:187002617 | TLR3   | 0.836   | 0.002 |
| cg01414772 | chr4:187002764 | TLR3   | 0.427   | 0.004 |
| cg00306510 | chr4:187003000 | TLR3   | 0.455   | 0.022 |
| cg05824016 | chrX:15651523  | TMEM27 | 0.913   | 0.002 |
| cg11336696 | chrX:15663437  | TMEM27 | 0.086   | 0.020 |
| cg15226856 | chrX:15665166  | TMEM27 | 0.907   | 0.000 |
| cg01282374 | chrX:15666287  | TMEM27 | 0.982   | 0.001 |
| cg11478498 | chrX:15672946  | TMEM27 | 0.060   | 0.051 |
| cg20473453 | chrX:15683007  | TMEM27 | 0.216   | 0.018 |
| cg26062907 | chrX:15683192  | TMEM27 | 0.255   | 0.011 |
| cg05779963 | chrX:15683204  | TMEM27 | 0.588   | 0.007 |
| cg12134159 | chrX:15683282  | TMEM27 | 0.265   | 0.029 |

|            |                |         |       |       |
|------------|----------------|---------|-------|-------|
| cg05219621 | chrX:15683403  | TMEM27  | 0.330 | 0.034 |
| cg06454337 | chrX:15683427  | TMEM27  | 0.657 | 0.010 |
| cg13876499 | chrX:15683696  | TMEM27  | 0.523 | 0.014 |
| cg27087885 | chrX:15683977  | TMEM27  | 0.488 | 0.016 |
| cg18156003 | chr21:42836963 | TMPRSS2 | 0.913 | 0.000 |
| cg19020860 | chr21:42837277 | TMPRSS2 | 0.098 | 0.011 |
| cg19974120 | chr21:42839625 | TMPRSS2 | 0.901 | 0.001 |
| cg12203615 | chr21:42840167 | TMPRSS2 | 0.092 | 0.017 |
| cg02610779 | chr21:42840442 | TMPRSS2 | 0.313 | 0.013 |
| cg02978411 | chr21:42840898 | TMPRSS2 | 0.318 | 0.005 |
| cg02702369 | chr21:42844174 | TMPRSS2 | 0.282 | 0.007 |
| cg16385367 | chr21:42844842 | TMPRSS2 | 0.225 | 0.011 |
| cg00255189 | chr21:42847772 | TMPRSS2 | 0.624 | 0.004 |
| cg02642997 | chr21:42849701 | TMPRSS2 | 0.532 | 0.007 |
| cg05218995 | chr21:42851888 | TMPRSS2 | 0.946 | 0.001 |
| cg02432628 | chr21:42853308 | TMPRSS2 | 0.055 | 0.007 |
| cg13698049 | chr21:42870391 | TMPRSS2 | 0.133 | 0.009 |
| cg07808966 | chr21:42873179 | TMPRSS2 | 0.628 | 0.006 |
| cg07919906 | chr21:42873733 | TMPRSS2 | 0.589 | 0.005 |
| cg13489049 | chr21:42875961 | TMPRSS2 | 0.054 | 0.012 |
| cg01157146 | chr21:42877638 | TMPRSS2 | 0.456 | 0.008 |
| cg22025068 | chr21:42878726 | TMPRSS2 | 0.056 | 0.017 |
| cg16084872 | chr21:42879074 | TMPRSS2 | 0.002 | 0.016 |
| cg02613803 | chr21:42879131 | TMPRSS2 | 0.183 | 0.007 |
| cg00739644 | chr21:42879658 | TMPRSS2 | 0.200 | 0.019 |
| cg26337277 | chr21:42879998 | TMPRSS2 | 0.104 | 0.002 |
| cg05563672 | chr21:42880077 | TMPRSS2 | 0.753 | 0.000 |
| cg19315202 | chr21:42880095 | TMPRSS2 | 0.741 | 0.001 |
| cg00689211 | chr21:42880107 | TMPRSS2 | 0.569 | 0.003 |
| cg15014277 | chr21:42880145 | TMPRSS2 | 0.610 | 0.001 |
| cg01036509 | chr21:42880231 | TMPRSS2 | 0.518 | 0.002 |
| cg16371860 | chr21:42880448 | TMPRSS2 | 0.269 | 0.010 |
| cg24901042 | chr21:42880554 | TMPRSS2 | 0.130 | 0.008 |
| cg26309194 | chr21:42880557 | TMPRSS2 | 0.534 | 0.005 |
| cg14982276 | chr21:42880582 | TMPRSS2 | 0.045 | 0.005 |
| cg12384236 | chr21:42880714 | TMPRSS2 | 0.097 | 0.003 |
| cg22484980 | chr11:68815449 | TPCN2   | 0.007 | 0.031 |
| cg26755111 | chr11:68815586 | TPCN2   | 0.022 | 0.014 |
| cg23247191 | chr11:68815682 | TPCN2   | 0.501 | 0.007 |
| cg22915154 | chr11:68816030 | TPCN2   | 0.071 | 0.019 |
| cg25170956 | chr11:68816067 | TPCN2   | 0.530 | 0.003 |
| cg01930488 | chr11:68816150 | TPCN2   | 0.637 | 0.003 |
| cg26054232 | chr11:68816191 | TPCN2   | 0.040 | 0.004 |
| cg02529490 | chr11:68816232 | TPCN2   | 0.117 | 0.018 |
| cg15335525 | chr11:68816274 | TPCN2   | 0.003 | 0.008 |
| cg19359505 | chr11:68816308 | TPCN2   | 0.873 | 0.000 |

|            |                |       |       |       |
|------------|----------------|-------|-------|-------|
| cg08278582 | chr11:68816414 | TPCN2 | 0.139 | 0.001 |
| cg10490196 | chr11:68816451 | TPCN2 | 0.522 | 0.001 |
| cg27481141 | chr11:68816453 | TPCN2 | 0.481 | 0.001 |
| cg06096695 | chr11:68816637 | TPCN2 | 0.861 | 0.000 |
| cg23121140 | chr11:68816938 | TPCN2 | 0.735 | 0.001 |
| cg06624991 | chr11:68818378 | TPCN2 | 0.063 | 0.012 |
| cg10256045 | chr11:68819068 | TPCN2 | 0.650 | 0.002 |
| cg11999939 | chr11:68821415 | TPCN2 | 0.883 | 0.002 |
| cg07827609 | chr11:68821754 | TPCN2 | 0.531 | 0.007 |
| cg27389775 | chr11:68822072 | TPCN2 | 0.012 | 0.016 |
| cg07959156 | chr11:68822506 | TPCN2 | 0.242 | 0.006 |
| cg17980216 | chr11:68822533 | TPCN2 | 0.198 | 0.004 |
| cg00603982 | chr11:68822544 | TPCN2 | 0.520 | 0.002 |
| cg05951984 | chr11:68823811 | TPCN2 | 0.024 | 0.037 |
| cg12411713 | chr11:68825135 | TPCN2 | 0.564 | 0.002 |
| cg01241272 | chr11:68825150 | TPCN2 | 0.590 | 0.003 |
| cg11648404 | chr11:68830440 | TPCN2 | 0.369 | 0.004 |
| cg22748539 | chr11:68830527 | TPCN2 | 0.560 | 0.001 |
| cg23671189 | chr11:68830561 | TPCN2 | 0.790 | 0.000 |
| cg06093500 | chr11:68832773 | TPCN2 | 0.859 | 0.002 |
| cg08478914 | chr11:68839802 | TPCN2 | 0.375 | 0.002 |
| cg02263035 | chr11:68840389 | TPCN2 | 0.510 | 0.008 |
| cg11361442 | chr11:68841024 | TPCN2 | 0.133 | 0.012 |
| cg17345676 | chr11:68842069 | TPCN2 | 0.227 | 0.019 |
| cg09801706 | chr11:68842350 | TPCN2 | 0.320 | 0.003 |
| cg26828599 | chr11:68842998 | TPCN2 | 0.471 | 0.003 |
| cg15572478 | chr11:68843521 | TPCN2 | 0.191 | 0.019 |
| cg06837675 | chr11:68845932 | TPCN2 | 0.820 | 0.003 |
| cg03472453 | chr11:68846042 | TPCN2 | 0.782 | 0.002 |
| cg13952997 | chr11:68846099 | TPCN2 | 0.222 | 0.005 |
| cg20267284 | chr11:68846972 | TPCN2 | 0.002 | 0.066 |
| cg15986248 | chr11:68847470 | TPCN2 | 0.020 | 0.007 |
| cg18503234 | chr11:68847839 | TPCN2 | 0.919 | 0.013 |
| cg10412127 | chr11:68848139 | TPCN2 | 0.001 | 0.040 |
| cg26433582 | chr11:68848232 | TPCN2 | 0.655 | 0.002 |
| cg05948321 | chr11:68848277 | TPCN2 | 0.017 | 0.024 |
| cg16006626 | chr11:68849960 | TPCN2 | 0.935 | 0.000 |
| cg17467664 | chr11:68851580 | TPCN2 | 0.515 | 0.002 |
| cg01993067 | chr11:68851601 | TPCN2 | 0.260 | 0.003 |
| cg01403660 | chr11:68851641 | TPCN2 | 0.891 | 0.002 |
| cg20256574 | chr11:68851821 | TPCN2 | 0.624 | 0.002 |
| cg09651302 | chr11:68851880 | TPCN2 | 0.398 | 0.003 |
| cg21186438 | chr11:68851932 | TPCN2 | 0.937 | 0.000 |
| cg16998906 | chr11:68853398 | TPCN2 | 0.015 | 0.011 |
| cg24868307 | chr11:68853686 | TPCN2 | 0.524 | 0.003 |
| cg18053228 | chr11:68853915 | TPCN2 | 0.379 | 0.006 |

|            |                |        |         |       |
|------------|----------------|--------|---------|-------|
| cg16005564 | chr11:68853957 | TPCN2  | 0.051   | 0.006 |
| cg08847919 | chr11:68854196 | TPCN2  | 0.192   | 0.003 |
| cg04888485 | chr11:68855216 | TPCN2  | 0.699   | 0.005 |
| cg25042173 | chr11:68855823 | TPCN2  | 0.080   | 0.007 |
| cg01385198 | chr11:68856225 | TPCN2  | 0.003   | 0.022 |
| cg16709353 | chr11:68856817 | TPCN2  | 0.746   | 0.005 |
| cg02584610 | chr11:68856883 | TPCN2  | 0.635   | 0.003 |
| cg12152352 | chr11:68856906 | TPCN2  | 0.004   | 0.032 |
| cg13874366 | chr11:68856951 | TPCN2  | 0.181   | 0.009 |
| cg13834366 | chr11:68857566 | TPCN2  | 0.898   | 0.000 |
| cg01030178 | chr8:67037892  | TRIM55 | 0.031   | 0.010 |
| cg24515709 | chr8:67038022  | TRIM55 | 0.367   | 0.004 |
| cg27035277 | chr8:67038272  | TRIM55 | 0.685   | 0.003 |
| cg11515052 | chr8:67038980  | TRIM55 | 0.963   | 0.006 |
| cg23322523 | chr8:67039041  | TRIM55 | 0.011   | 0.013 |
| cg25914706 | chr8:67039068  | TRIM55 | 0.634   | 0.002 |
| cg07180197 | chr8:67039155  | TRIM55 | 0.005   | 0.024 |
| cg27465837 | chr8:67039178  | TRIM55 | 0.013   | 0.022 |
| cg19975482 | chr8:67039256  | TRIM55 | 0.141   | 0.007 |
| cg04145765 | chr8:67039461  | TRIM55 | 0.097   | 0.008 |
| cg14418968 | chr8:67040331  | TRIM55 | 0.010   | 0.015 |
| cg25922284 | chr8:67042176  | TRIM55 | 0.004   | 0.075 |
| cg00793977 | chr8:67042666  | TRIM55 | < 0.001 | 0.020 |
| cg10986302 | chr8:67045991  | TRIM55 | 0.886   | 0.001 |
| cg21165595 | chr8:67046248  | TRIM55 | 0.362   | 0.008 |
| cg26104239 | chr8:67047851  | TRIM55 | 0.175   | 0.004 |
| cg10479107 | chr8:67049448  | TRIM55 | 0.086   | 0.024 |
| cg25483191 | chr8:67050040  | TRIM55 | 0.623   | 0.001 |
| cg09173500 | chr8:67053592  | TRIM55 | 0.620   | 0.002 |
| cg23973532 | chr8:67054592  | TRIM55 | 0.475   | 0.016 |
| cg01352267 | chr8:67064467  | TRIM55 | 0.043   | 0.008 |
| cg26700215 | chr8:67070006  | TRIM55 | 0.839   | 0.001 |
| cg04041976 | chr8:67085823  | TRIM55 | 0.554   | 0.002 |
| cg16888621 | chr8:67085866  | TRIM55 | 0.752   | 0.001 |
| cg07515324 | chr19:10461336 | TYK2   | 0.143   | 0.008 |
| cg02319549 | chr19:10463037 | TYK2   | 0.780   | 0.001 |
| cg13971552 | chr19:10463352 | TYK2   | 0.866   | 0.002 |
| cg03889617 | chr19:10463828 | TYK2   | 0.963   | 0.000 |
| cg21480173 | chr19:10463831 | TYK2   | 0.941   | 0.000 |
| cg23306063 | chr19:10463879 | TYK2   | 0.280   | 0.005 |
| cg02512212 | chr19:10464100 | TYK2   | 0.041   | 0.011 |
| cg18038269 | chr19:10464320 | TYK2   | 0.282   | 0.002 |
| cg11575644 | chr19:10464711 | TYK2   | 0.128   | 0.004 |
| cg19925475 | chr19:10464767 | TYK2   | 0.478   | 0.003 |
| cg00590639 | chr19:10464771 | TYK2   | 0.388   | 0.000 |
| cg23184299 | chr19:10464922 | TYK2   | 0.613   | 0.004 |

|            |                |         |         |       |
|------------|----------------|---------|---------|-------|
| cg11369662 | chr19:10465257 | TYK2    | 0.698   | 0.000 |
| cg06917623 | chr19:10467366 | TYK2    | 0.809   | 0.002 |
| cg25613873 | chr19:10468706 | TYK2    | 0.844   | 0.001 |
| cg07488370 | chr19:10472265 | TYK2    | 0.116   | 0.008 |
| cg18892020 | chr19:10472451 | TYK2    | 0.440   | 0.004 |
| cg00079643 | chr19:10472658 | TYK2    | 0.427   | 0.006 |
| cg14025953 | chr19:10472966 | TYK2    | 0.847   | 0.001 |
| cg11057783 | chr19:10473307 | TYK2    | 0.851   | 0.001 |
| cg12184486 | chr19:10474184 | TYK2    | 0.554   | 0.001 |
| cg01547781 | chr19:10474464 | TYK2    | 0.490   | 0.004 |
| cg10144807 | chr19:10474912 | TYK2    | 0.154   | 0.007 |
| cg05314616 | chr19:10475269 | TYK2    | 0.871   | 0.002 |
| cg06935109 | chr19:10476554 | TYK2    | 0.353   | 0.001 |
| cg26244993 | chr19:10477232 | TYK2    | 0.524   | 0.006 |
| cg26142436 | chr19:10479250 | TYK2    | 0.264   | 0.007 |
| cg19307883 | chr19:10484624 | TYK2    | 0.610   | 0.007 |
| cg15197202 | chr19:10488965 | TYK2    | 0.153   | 0.008 |
| cg22554952 | chr19:10489088 | TYK2    | 0.067   | 0.005 |
| cg18611797 | chr19:10489256 | TYK2    | 0.086   | 0.009 |
| cg25395945 | chr19:10489394 | TYK2    | 0.200   | 0.015 |
| cg24226087 | chr19:10490782 | TYK2    | 0.664   | 0.001 |
| cg18856252 | chr19:10491173 | TYK2    | 0.727   | 0.001 |
| cg15079565 | chr19:10491255 | TYK2    | 0.959   | 0.000 |
| cg11331422 | chr19:10491258 | TYK2    | 0.822   | 0.000 |
| cg25676786 | chr19:10491363 | TYK2    | 0.031   | 0.004 |
| cg16068727 | chr19:10491392 | TYK2    | 0.456   | 0.002 |
| cg21941105 | chr19:10491405 | TYK2    | 0.208   | 0.002 |
| cg15981620 | chr19:10491431 | TYK2    | 0.014   | 0.003 |
| cg06622468 | chr19:10491460 | TYK2    | 0.954   | 0.002 |
| cg08896629 | chr19:10491577 | TYK2    | 0.989   | 0.000 |
| cg22140136 | chr19:10491633 | TYK2    | 0.680   | 0.003 |
| cg11400613 | chr19:10491835 | TYK2    | 0.144   | 0.005 |
| cg26265787 | chr19:10491889 | TYK2    | 0.025   | 0.030 |
| cg18069484 | chr11:67764105 | UNC93B1 | 0.335   | 0.002 |
| cg17066594 | chr11:67764654 | UNC93B1 | 0.226   | 0.047 |
| cg15617336 | chr11:67764948 | UNC93B1 | 0.758   | 0.000 |
| cg08480739 | chr11:67765021 | UNC93B1 | 0.025   | 0.010 |
| cg03267954 | chr11:67765141 | UNC93B1 | 0.047   | 0.013 |
| cg20272935 | chr11:67765720 | UNC93B1 | 0.037   | 0.028 |
| cg09145322 | chr11:67766631 | UNC93B1 | 0.117   | 0.010 |
| cg19469649 | chr11:67766769 | UNC93B1 | 0.187   | 0.007 |
| cg07744435 | chr11:67768362 | UNC93B1 | 0.300   | 0.010 |
| cg01711344 | chr11:67770404 | UNC93B1 | 0.013   | 0.034 |
| cg11027221 | chr11:67770665 | UNC93B1 | < 0.001 | 0.032 |
| cg16904500 | chr11:67770959 | UNC93B1 | 0.089   | 0.002 |
| cg15260365 | chr11:67771606 | UNC93B1 | 0.415   | 0.005 |

|            |                |         |         |       |
|------------|----------------|---------|---------|-------|
| cg25756680 | chr11:67771726 | UNC93B1 | 0.999   | 0.001 |
| cg04108360 | chr11:67771791 | UNC93B1 | 0.076   | 0.019 |
| cg03235688 | chr11:67771801 | UNC93B1 | 0.001   | 0.026 |
| cg13868942 | chr11:67771812 | UNC93B1 | 0.008   | 0.020 |
| cg02044612 | chr11:67772000 | UNC93B1 | 0.415   | 0.006 |
| cg11200858 | chr11:67772273 | UNC93B1 | 0.022   | 0.021 |
| cg11733617 | chr11:67772601 | UNC93B1 | 0.237   | 0.005 |
| cg22447416 | chr11:67772826 | UNC93B1 | 0.989   | 0.001 |
| cg27027206 | chr13:42151743 | VWA8    | < 0.001 | 0.077 |
| cg21497029 | chr13:42161739 | VWA8    | 0.001   | 0.017 |
| cg25568501 | chr13:42162968 | VWA8    | 0.635   | 0.002 |
| cg03810562 | chr13:42165082 | VWA8    | 0.481   | 0.006 |
| cg27099134 | chr13:42180866 | VWA8    | 0.123   | 0.005 |
| cg03795663 | chr13:42188218 | VWA8    | 0.211   | 0.003 |
| cg02243249 | chr13:42188453 | VWA8    | 0.484   | 0.002 |
| cg10341691 | chr13:42219219 | VWA8    | 0.604   | 0.002 |
| cg12099998 | chr13:42222230 | VWA8    | 0.061   | 0.012 |
| cg09580278 | chr13:42222676 | VWA8    | 0.073   | 0.006 |
| cg08659034 | chr13:42224070 | VWA8    | 0.024   | 0.015 |
| cg12434040 | chr13:42227088 | VWA8    | 0.402   | 0.013 |
| cg11430223 | chr13:42232607 | VWA8    | 0.096   | 0.021 |
| cg22241686 | chr13:42242375 | VWA8    | 0.006   | 0.054 |
| cg21860329 | chr13:42265546 | VWA8    | < 0.001 | 0.164 |
| cg07584516 | chr13:42269266 | VWA8    | < 0.001 | 0.111 |
| cg12396757 | chr13:42271163 | VWA8    | 0.074   | 0.012 |
| cg21829495 | chr13:42295758 | VWA8    | 0.717   | 0.002 |
| cg23573337 | chr13:42325829 | VWA8    | 0.044   | 0.011 |
| cg05252898 | chr13:42362736 | VWA8    | 0.001   | 0.036 |
| cg07717466 | chr13:42362761 | VWA8    | < 0.001 | 0.051 |
| cg06130225 | chr13:42386036 | VWA8    | 0.983   | 0.010 |
| cg13629862 | chr13:42387252 | VWA8    | < 0.001 | 0.029 |
| cg02008703 | chr13:42395382 | VWA8    | 0.295   | 0.020 |
| cg26177408 | chr13:42402429 | VWA8    | 0.147   | 0.018 |
| cg12005153 | chr13:42412158 | VWA8    | 0.924   | 0.001 |
| cg22945982 | chr13:42443309 | VWA8    | 0.136   | 0.013 |
| cg23336397 | chr13:42453261 | VWA8    | 0.354   | 0.014 |
| cg13058467 | chr13:42477894 | VWA8    | 0.760   | 0.001 |
| cg02523709 | chr13:42478085 | VWA8    | 0.060   | 0.007 |
| cg24929734 | chr13:42478092 | VWA8    | 0.114   | 0.008 |
| cg08767171 | chr13:42491015 | VWA8    | 0.693   | 0.003 |
| cg25682700 | chr13:42493215 | VWA8    | 0.624   | 0.007 |
| cg00146247 | chr13:42516684 | VWA8    | 0.168   | 0.004 |
| cg15806257 | chr13:42519184 | VWA8    | 0.058   | 0.009 |
| cg11224904 | chr13:42530006 | VWA8    | 0.003   | 0.067 |
| cg07217215 | chr13:42535514 | VWA8    | 0.122   | 0.013 |
| cg13431152 | chr3:46062321  | XCR1    | 0.132   | 0.012 |



|            |               |      |       |       |
|------------|---------------|------|-------|-------|
| cg09257432 | chr3:46062588 | XCR1 | 0.134 | 0.009 |
| cg04860142 | chr3:46062662 | XCR1 | 0.827 | 0.001 |
| cg19967421 | chr3:46062881 | XCR1 | 0.792 | 0.000 |
| cg12691230 | chr3:46064611 | XCR1 | 0.263 | 0.005 |
| cg10360403 | chr3:46064716 | XCR1 | 0.142 | 0.008 |
| cg08459918 | chr3:46065328 | XCR1 | 0.337 | 0.007 |
| cg15888522 | chr3:46068932 | XCR1 | 0.005 | 0.012 |
| cg10096268 | chr3:46070193 | XCR1 | 0.269 | 0.005 |
| cg12931860 | chr3:46070399 | XCR1 | 0.850 | 0.001 |

Notes: CpG ID corresponds to the unique CpG site identifier in the HumanMethylationEPIC array (Illumina). Chromosomal location denoted according human reference assembly GRCh37/hg19. All depicted P values are FDR adjusted P values. CpG-sites with an absolute mean methylation beta value difference > 0.15 and FDR adjusted P value < 0.05 were considered statistically significant.

\*Included studies:

Bastard P, Rosen LB, Zhang Q, et al. Autoantibodies against type I IFNs in patients with life-threatening COVID-19. *Science* 2020; **370**: eabd4585.

Mousa M, Vurivi H, Kannout H, et al. Genome-wide association study of hospitalized COVID-19 patients in the United Arab Emirates. *EBioMedicine* 2021; **74**: 103695.

Pairo-Castineira E, Clohisey S, Klaric L, et al. Genetic mechanisms of critical illness in Covid-19. *Nature* 2020; **591**: 92–98.

Severe Covid-19 GWAS Group, Ellinghaus D, Degenhardt F, et al. Genomewide association study of severe Covid-19 with respiratory failure. *N Engl J Med* 2020; **383**: 1522–34.

Singh H, Choudhari R, Nema V, Khan AA. ACE2 and TMPRSS2 polymorphisms in various diseases with special reference to its impact on COVID-19 disease. *Microb Pathog* 2020; **150**: 104621.

van der Made CI, Simons A, Schuurs-Hoeijmakers J, et al. Presence of genetic variants among young men with severe COVID-19. *JAMA* 2020; **324**: 1–11.

Zhang Q, Bastard P, Liu Z, et al. Inborn errors of type I IFN immunity in patients with life-threatening COVID-19. *Science* 2020; **370**: eabd4570.

**Supplementary Table S5.** Description of the 68 CpG sites in the 3 genes related to MIS-C, based on published studies\*.

| <b>CpG ID</b> | <b>Chromosome location</b> | <b>Gene name</b> | <b>P value</b> | <b>Absolute mean methylation difference</b> |
|---------------|----------------------------|------------------|----------------|---------------------------------------------|
| cg09938226    | chrX:37641307              | CYBB             | 0.765          | 0.039                                       |
| cg03198297    | chrX:37646886              | CYBB             | 0.914          | 0.026                                       |
| cg17037297    | chrX:37649522              | CYBB             | 0.354          | 0.074                                       |
| cg12290270    | chrX:37656559              | CYBB             | 0.713          | 0.050                                       |
| cg21794913    | chrX:37656644              | CYBB             | 0.048          | 0.036                                       |
| cg21065784    | chrX:37656759              | CYBB             | 0.978          | 0.049                                       |
| cg07525792    | chrX:37659262              | CYBB             | 0.409          | 0.017                                       |
| cg15235844    | chrX:37671328              | CYBB             | 0.151          | 0.030                                       |
| cg03014241    | chr16:11348611             | SOCS1            | 0.816          | 0.040                                       |
| cg10784813    | chr16:11348678             | SOCS1            | 0.766          | 0.012                                       |
| cg04004558    | chr16:11348684             | SOCS1            | 0.946          | 0.016                                       |
| cg04266460    | chr16:11348956             | SOCS1            | 0.002          | 0.003                                       |
| cg06220235    | chr16:11349023             | SOCS1            | < 0.001        | 0.003                                       |
| cg01717706    | chr16:11349308             | SOCS1            | 0.069          | 0.002                                       |
| cg26012103    | chr16:11349372             | SOCS1            | 0.079          | 0.001                                       |
| cg00487159    | chr16:11349568             | SOCS1            | 0.369          | 0.002                                       |
| cg11973052    | chr16:11349832             | SOCS1            | < 0.001        | 0.001                                       |
| cg27003951    | chr16:11350045             | SOCS1            | < 0.001        | 0.001                                       |
| cg27540841    | chr16:11350112             | SOCS1            | < 0.001        | 0.001                                       |
| cg03553358    | chr16:11350115             | SOCS1            | 0.676          | 0.024                                       |
| cg12642006    | chr16:11350118             | SOCS1            | 0.434          | 0.006                                       |
| cg26233182    | chr16:11350235             | SOCS1            | 0.170          | 0.002                                       |
| cg01330880    | chr16:11350249             | SOCS1            | 0.049          | 0.000                                       |
| cg06082432    | chr16:11350275             | SOCS1            | 0.106          | 0.001                                       |
| cg06295404    | chr16:11350337             | SOCS1            | 0.021          | 0.000                                       |
| cg09567644    | chr16:11350363             | SOCS1            | 0.033          | 0.002                                       |
| cg03195600    | chr16:11350371             | SOCS1            | 0.101          | 0.008                                       |
| cg05766667    | chr16:11350740             | SOCS1            | < 0.001        | 0.001                                       |
| cg00674265    | chr16:11350746             | SOCS1            | 0.205          | 0.000                                       |
| cg26301908    | chr16:11350915             | SOCS1            | 0.618          | 0.007                                       |
| cg10513253    | chr16:11351136             | SOCS1            | 0.696          | 0.000                                       |
| cg05181221    | chr16:11351158             | SOCS1            | 0.926          | 0.001                                       |
| cg04289163    | chr16:11351165             | SOCS1            | 0.280          | 0.001                                       |
| cg04609482    | chr16:11351169             | SOCS1            | 0.956          | 0.017                                       |
| cg05902273    | chr16:11351199             | SOCS1            | 0.542          | 0.003                                       |
| cg05730996    | chr16:11351330             | SOCS1            | 0.155          | 0.007                                       |
| cg01490918    | chrX:122992224             | XIAP             | 0.804          | 0.005                                       |
| cg23933262    | chrX:122993037             | XIAP             | 0.262          | 0.086                                       |
| cg02386862    | chrX:122993369             | XIAP             | 0.522          | 0.045                                       |
| cg00920960    | chrX:122993419             | XIAP             | 0.504          | 0.071                                       |
| cg21494642    | chrX:122993581             | XIAP             | 0.527          | 0.066                                       |

|            |                |      |       |       |
|------------|----------------|------|-------|-------|
| cg03966760 | chrX:122993583 | XIAP | 0.581 | 0.036 |
| cg06772067 | chrX:122993679 | XIAP | 0.526 | 0.088 |
| cg21945665 | chrX:122993695 | XIAP | 0.463 | 0.026 |
| cg10873964 | chrX:122993706 | XIAP | 0.442 | 0.094 |
| cg08282969 | chrX:122993891 | XIAP | 0.633 | 0.080 |
| cg07874334 | chrX:122993913 | XIAP | 0.464 | 0.086 |
| cg04302178 | chrX:122993941 | XIAP | 0.480 | 0.110 |
| cg17033281 | chrX:122993976 | XIAP | 0.528 | 0.072 |
| cg17703220 | chrX:122993978 | XIAP | 0.458 | 0.073 |
| cg21711683 | chrX:122994030 | XIAP | 0.477 | 0.083 |
| cg16778620 | chrX:122994037 | XIAP | 0.851 | 0.067 |
| cg09950034 | chrX:122994069 | XIAP | 0.968 | 0.079 |
| cg12375308 | chrX:122994071 | XIAP | 0.606 | 0.078 |
| cg21723696 | chrX:122994177 | XIAP | 0.464 | 0.044 |
| cg25514427 | chrX:122994594 | XIAP | 0.485 | 0.092 |
| cg05198817 | chrX:122995701 | XIAP | 0.862 | 0.041 |
| cg11315455 | chrX:122997585 | XIAP | 0.056 | 0.018 |
| cg10095090 | chrX:123008155 | XIAP | 0.513 | 0.021 |
| cg11585623 | chrX:123008314 | XIAP | 0.261 | 0.012 |
| cg06895894 | chrX:123011980 | XIAP | 0.559 | 0.049 |
| cg20908014 | chrX:123019820 | XIAP | 0.610 | 0.012 |
| cg12794939 | chrX:123033885 | XIAP | 0.155 | 0.018 |
| cg13886984 | chrX:123038397 | XIAP | 0.623 | 0.009 |
| cg06742180 | chrX:123039177 | XIAP | 0.308 | 0.074 |
| cg03170186 | chrX:123039334 | XIAP | 0.041 | 0.003 |
| cg14311341 | chrX:123040677 | XIAP | 0.644 | 0.072 |
| cg02877744 | chrX:123047040 | XIAP | 0.660 | 0.008 |

Notes: CpG ID corresponds to the unique CpG site identifier in the HumanMethylationEPIC array (Illumina). Chromosomal location denoted according human reference assembly GRCh37/hg19. All depicted P values are FDR adjusted P values. CpG-sites with an absolute mean methylation beta value difference > 0.15 and FDR adjusted P value < 0.05 were considered statistically significant.

\*Included studies:

Chou J, Platt CD, Habiballah S, et al. Mechanisms underlying genetic susceptibility to multisystem inflammatory syndrome in children (MIS-C). *J Allergy Clin Immunol* 2021; **148**(3): 732–738.e1.

Lee PY, Platt CD, Weeks S, et al. Immune dysregulation and multisystem inflammatory syndrome in children (MIS-C) in individuals with haploinsufficiency of SOCS1. *J Allergy Clin Immunol* 2020; **146**(5): 1194–1200.e1.

**Supplementary Table S6.** EPIMISC derived-CpGs in the validation and entire cohorts, according to the study pipeline described in Supplementary Figure S1.

| CpG ID     | Chromosome location | Gene name    | Validation cohort |                                      | Entire cohort |                                      |
|------------|---------------------|--------------|-------------------|--------------------------------------|---------------|--------------------------------------|
|            |                     |              | P value           | Absolute mean methylation difference | P value       | Absolute mean methylation difference |
| cg03776649 | chr5:125465533      |              | 0.005             | 0.369                                | < 0.001       | 0.248                                |
| cg20995564 | chr2:145172035      | ZEB2         | 0.001             | 0.284                                | < 0.001       | 0.277                                |
| cg22203628 | chr11:69241075      |              | 0.003             | 0.265                                | < 0.001       | 0.213                                |
| cg20292908 | chr5:172203421      |              | 0.001             | 0.262                                | < 0.001       | 0.285                                |
| cg26830054 | chr10:119762394     |              | 0.003             | 0.244                                | < 0.001       | 0.215                                |
| cg15033511 | chr17:54994023      |              | 0.003             | 0.237                                | < 0.001       | 0.210                                |
| cg06135068 | chr16:31034016      |              | < 0.001           | 0.233                                | < 0.001       | 0.223                                |
| cg21860329 | chr13:42265546      | VWA8         | 0.003             | 0.218                                | < 0.001       | 0.182                                |
| cg13178755 | chr2:174023580      | ZAK          | 0.004             | 0.192                                | < 0.001       | 0.166                                |
| cg04544473 | chr4:153021978      | LOC100996286 | 0.004             | 0.189                                | < 0.001       | 0.164                                |
| cg16729631 | chr8:131000261      |              | 0.004             | 0.185                                | < 0.001       | 0.163                                |
| cg20059012 | chr12:53613154      | RARG         | 0.009             | 0.181                                | < 0.001       | 0.162                                |
| cg11023668 | chr2:25095040       | ADCY3        | 0.004             | 0.178                                | < 0.001       | 0.160                                |
| cg17279147 | chr6:14739369       |              | 0.016             | 0.176                                | < 0.001       | 0.159                                |
| cg22994883 | chr7:130615334      |              | 0.003             | 0.171                                | < 0.001       | 0.157                                |
| cg01297684 | chr12:56069634      |              | 0.003             | 0.165                                | < 0.001       | 0.177                                |
| cg14887853 | chr6:139794538      | LOC645434    | 0.006             | 0.164                                | < 0.001       | 0.162                                |
| cg12662084 | chr6:17809126       | KIF13A       | 0.003             | 0.162                                | < 0.001       | 0.159                                |
| cg20361768 | chr3:156819083      | LINC00880    | 0.003             | 0.152                                | < 0.001       | 0.171                                |
| cg17515347 | chr1:159047163      | AIM2         | 0.008             | 0.151                                | < 0.001       | 0.151                                |
| cg21963178 | chr10:75571738      | NDST2        | 0.419             | 0.114                                | 0.001         | 0.156                                |
| cg18066211 | chr4:99369082       |              | 0.016             | 0.114                                | < 0.001       | 0.139                                |
| cg05712639 | chr14:52819386      |              | 0.027             | 0.114                                | < 0.001       | 0.150                                |
| cg24433124 | chr6:30755968       |              | 0.393             | 0.113                                | 0.001         | 0.152                                |
| cg16402757 | chr10:35311004      | CUL2         | 0.677             | 0.087                                | 0.017         | 0.173                                |
| cg16600909 | chr1:173145001      |              | 0.466             | 0.074                                | 0.003         | 0.129                                |
| cg01062020 | chr1:162382848      | SH2D1B       | 0.295             | 0.068                                | < 0.001       | 0.152                                |
| cg08776296 | chr7:134856544      | CYREN        | 0.364             | 0.055                                | 0.003         | 0.120                                |
| cg06386482 | chr6:47624117       | GPR111       | 0.587             | 0.049                                | 0.007         | 0.104                                |
| cg02578087 | chr3:8671361        | SSUH2        | 0.373             | 0.048                                | 0.004         | 0.139                                |
| cg13910785 | chr6:32549849       | HLA-DRB1     | 0.987             | 0.032                                | 0.078         | 0.104                                |
| cg07167872 | chr1:205819463      | PM20D1       | 0.930             | 0.011                                | 0.053         | 0.105                                |
| cg03192273 | chr5:150618948      |              | 0.995             | 0.004                                | 0.054         | 0.111                                |

Notes: CpG ID corresponds to the unique CpG site identifier in the HumanMethylationEPIC array (Illumina). Chromosomal location denoted according human reference assembly GRCh37/hg19. All depicted P values are FDR adjusted P values. CpG-sites with an absolute mean methylation beta value difference > 0.15 and FDR adjusted P value < 0.05 were considered statistically significant.

**Supplementary Table S7.** Description of the 1350 CpG sites in the 33 genes related to Kawasaki disease, based on published studies\*.

| <b>CpG ID</b> | <b>Chromosome location</b> | <b>Gene name</b> | <b>P value</b> | <b>Absolute mean methylation difference</b> |
|---------------|----------------------------|------------------|----------------|---------------------------------------------|
| cg04986849    | chr8:11350092              | BLK              | 0.718          | 0.014                                       |
| cg10147394    | chr8:11350297              | BLK              | 0.962          | 0.003                                       |
| cg15683292    | chr8:11350515              | BLK              | 0.297          | 0.002                                       |
| cg15742700    | chr8:11350853              | BLK              | 0.985          | 0.020                                       |
| cg13440894    | chr8:11351135              | BLK              | 0.154          | 0.012                                       |
| cg22826986    | chr8:11351507              | BLK              | 0.572          | 0.009                                       |
| cg03860768    | chr8:11351571              | BLK              | 0.608          | 0.005                                       |
| cg18591982    | chr8:11351583              | BLK              | 0.695          | 0.006                                       |
| cg27406521    | chr8:11351770              | BLK              | 0.071          | 0.003                                       |
| cg07959027    | chr8:11351835              | BLK              | 0.918          | 0.008                                       |
| cg19882315    | chr8:11351846              | BLK              | 0.521          | 0.018                                       |
| cg00580089    | chr8:11355562              | BLK              | 0.157          | 0.017                                       |
| cg00018682    | chr8:11359569              | BLK              | 0.575          | 0.007                                       |
| cg05321338    | chr8:11365455              | BLK              | 0.124          | 0.000                                       |
| cg04578612    | chr8:11365915              | BLK              | 0.486          | 0.004                                       |
| cg21497594    | chr8:11366745              | BLK              | 0.922          | 0.008                                       |
| cg10812376    | chr8:11367985              | BLK              | 0.306          | 0.005                                       |
| cg09205687    | chr8:11370624              | BLK              | 0.053          | 0.006                                       |
| cg21701351    | chr8:11374773              | BLK              | 0.815          | 0.003                                       |
| cg02034205    | chr8:11382291              | BLK              | 0.884          | 0.004                                       |
| cg12571819    | chr8:11387351              | BLK              | 0.804          | 0.003                                       |
| cg14921801    | chr8:11389209              | BLK              | 0.007          | 0.015                                       |
| cg23507676    | chr8:11395642              | BLK              | 0.489          | 0.016                                       |
| cg08361089    | chr8:11396323              | BLK              | 0.003          | 0.014                                       |
| cg07608611    | chr8:11402219              | BLK              | 0.034          | 0.009                                       |
| cg03002059    | chr8:11402647              | BLK              | 0.319          | 0.001                                       |
| cg10343719    | chr8:11403233              | BLK              | 0.164          | 0.016                                       |
| cg01879562    | chr8:11403516              | BLK              | 0.308          | 0.003                                       |
| cg21410383    | chr8:11404830              | BLK              | 0.794          | 0.003                                       |
| cg13835576    | chr8:11407354              | BLK              | 0.295          | 0.048                                       |
| cg19384726    | chr8:11409058              | BLK              | 0.221          | 0.003                                       |
| cg12641275    | chr8:11411487              | BLK              | 0.698          | 0.006                                       |
| cg01538039    | chr8:11411788              | BLK              | 0.620          | 0.013                                       |
| cg20652749    | chr8:11411795              | BLK              | 0.335          | 0.009                                       |
| cg16554881    | chr8:11412199              | BLK              | 0.259          | 0.005                                       |
| cg15685006    | chr8:11413043              | BLK              | 0.655          | 0.003                                       |
| cg26161004    | chr8:11413186              | BLK              | 0.927          | 0.002                                       |
| cg14702231    | chr8:11413234              | BLK              | 0.288          | 0.021                                       |
| cg02978838    | chr8:11413591              | BLK              | 0.092          | 0.009                                       |
| cg03286662    | chr8:11414004              | BLK              | 0.993          | 0.005                                       |

|            |                |       |       |       |
|------------|----------------|-------|-------|-------|
| cg07623233 | chr8:11415543  | BLK   | 0.438 | 0.095 |
| cg11899815 | chr8:11415578  | BLK   | 0.184 | 0.098 |
| cg10037292 | chr8:11415838  | BLK   | 0.881 | 0.010 |
| cg20900678 | chr8:11416319  | BLK   | 0.142 | 0.003 |
| cg13533935 | chr8:11416365  | BLK   | 0.007 | 0.002 |
| cg04335815 | chr8:11417517  | BLK   | 0.401 | 0.002 |
| cg19655051 | chr8:11418372  | BLK   | 0.516 | 0.001 |
| cg07764073 | chr8:11419707  | BLK   | 0.887 | 0.001 |
| cg21175976 | chr8:11421337  | BLK   | 0.880 | 0.009 |
| cg02910793 | chr8:11421934  | BLK   | 0.003 | 0.002 |
| cg13339708 | chr4:185549367 | CASP3 | 0.322 | 0.002 |
| cg20176042 | chr4:185552304 | CASP3 | 0.303 | 0.007 |
| cg25028736 | chr4:185556747 | CASP3 | 0.965 | 0.083 |
| cg09185219 | chr4:185566292 | CASP3 | 0.351 | 0.006 |
| cg19035151 | chr4:185566711 | CASP3 | 0.206 | 0.002 |
| cg19290403 | chr4:185567382 | CASP3 | 0.209 | 0.006 |
| cg07234880 | chr4:185570559 | CASP3 | 0.313 | 0.001 |
| cg00444120 | chr4:185570857 | CASP3 | 0.018 | 0.001 |
| cg23259381 | chr4:185570876 | CASP3 | 0.004 | 0.001 |
| cg20811273 | chr4:185570979 | CASP3 | 0.117 | 0.001 |
| cg21490662 | chr4:185571520 | CASP3 | 0.181 | 0.004 |
| cg12167823 | chr4:185571549 | CASP3 | 0.398 | 0.008 |
| cg15171237 | chr4:185571958 | CASP3 | 0.420 | 0.001 |
| cg01149415 | chr20:44745522 | CD40  | 0.074 | 0.010 |
| cg09053081 | chr20:44746392 | CD40  | 0.262 | 0.001 |
| cg17929951 | chr20:44746681 | CD40  | 0.133 | 0.002 |
| cg11841529 | chr20:44746751 | CD40  | 0.230 | 0.005 |
| cg06571407 | chr20:44746823 | CD40  | 0.574 | 0.026 |
| cg22232207 | chr20:44746825 | CD40  | 0.593 | 0.027 |
| cg24575067 | chr20:44746902 | CD40  | 0.837 | 0.004 |
| cg01943874 | chr20:44746944 | CD40  | 0.298 | 0.006 |
| cg21601405 | chr20:44747006 | CD40  | 0.118 | 0.004 |
| cg16686951 | chr20:44747351 | CD40  | 0.047 | 0.003 |
| cg20119505 | chr20:44748928 | CD40  | 0.305 | 0.015 |
| cg13858266 | chr20:44750927 | CD40  | 0.942 | 0.005 |
| cg06218285 | chr20:44751033 | CD40  | 0.127 | 0.010 |
| cg07222575 | chr20:44757985 | CD40  | 0.007 | 0.012 |
| cg25875565 | chr3:139078139 | COPB2 | 0.860 | 0.005 |
| cg16290059 | chr3:139082156 | COPB2 | 0.551 | 0.003 |
| cg17206056 | chr3:139103460 | COPB2 | 0.949 | 0.012 |
| cg16064982 | chr3:139106137 | COPB2 | 0.996 | 0.015 |
| cg17463863 | chr3:139106943 | COPB2 | 0.058 | 0.004 |
| cg23211065 | chr3:139107044 | COPB2 | 0.201 | 0.009 |
| cg17358529 | chr3:139107113 | COPB2 | 0.911 | 0.000 |
| cg25474358 | chr3:139107739 | COPB2 | 0.563 | 0.009 |
| cg18313110 | chr3:139108398 | COPB2 | 0.016 | 0.001 |

|            |                |       |         |       |
|------------|----------------|-------|---------|-------|
| cg09695652 | chr3:139108473 | COPB2 | 0.133   | 0.016 |
| cg12377709 | chr3:139108535 | COPB2 | 0.003   | 0.001 |
| cg06812153 | chr3:139108540 | COPB2 | < 0.001 | 0.001 |
| cg16624187 | chr3:139108582 | COPB2 | 0.047   | 0.001 |
| cg00490450 | chr3:139108681 | COPB2 | 0.047   | 0.001 |
| cg15131784 | chr3:139108705 | COPB2 | 0.033   | 0.003 |
| cg09650667 | chr3:139108740 | COPB2 | 0.007   | 0.003 |
| cg16609941 | chr3:139108945 | COPB2 | 0.021   | 0.004 |
| cg14871365 | chr3:139108972 | COPB2 | 0.233   | 0.001 |
| cg07203320 | chr3:139108984 | COPB2 | 0.048   | 0.003 |
| cg14937036 | chr3:139109058 | COPB2 | 0.002   | 0.002 |
| cg23171871 | chr5:169063935 | DOCK2 | 0.282   | 0.001 |
| cg26503653 | chr5:169064024 | DOCK2 | 0.099   | 0.002 |
| cg23598132 | chr5:169064038 | DOCK2 | 0.138   | 0.002 |
| cg21771173 | chr5:169064071 | DOCK2 | 0.799   | 0.004 |
| cg24512013 | chr5:169064133 | DOCK2 | 0.230   | 0.005 |
| cg12800762 | chr5:169064311 | DOCK2 | 0.145   | 0.000 |
| cg08862890 | chr5:169064451 | DOCK2 | 0.009   | 0.002 |
| cg23338503 | chr5:169064530 | DOCK2 | < 0.001 | 0.007 |
| cg21233722 | chr5:169064660 | DOCK2 | 0.001   | 0.005 |
| cg23184477 | chr5:169064897 | DOCK2 | 0.585   | 0.018 |
| cg16277944 | chr5:169068404 | DOCK2 | 0.263   | 0.004 |
| cg07674170 | chr5:169071225 | DOCK2 | 0.002   | 0.022 |
| cg04780741 | chr5:169073733 | DOCK2 | 0.092   | 0.002 |
| cg24463026 | chr5:169074977 | DOCK2 | 0.978   | 0.049 |
| cg01986936 | chr5:169075768 | DOCK2 | 0.499   | 0.058 |
| cg25365401 | chr5:169075924 | DOCK2 | 0.875   | 0.068 |
| cg13604628 | chr5:169076577 | DOCK2 | 0.043   | 0.067 |
| cg11387564 | chr5:169078121 | DOCK2 | 0.001   | 0.002 |
| cg24125386 | chr5:169079813 | DOCK2 | 0.039   | 0.006 |
| cg14784010 | chr5:169083252 | DOCK2 | 0.147   | 0.014 |
| cg25213601 | chr5:169095178 | DOCK2 | 0.043   | 0.001 |
| cg12627202 | chr5:169096691 | DOCK2 | 0.464   | 0.002 |
| cg05780155 | chr5:169098837 | DOCK2 | 0.414   | 0.002 |
| cg06795948 | chr5:169109554 | DOCK2 | 0.554   | 0.003 |
| cg27028475 | chr5:169113219 | DOCK2 | 0.390   | 0.002 |
| cg02363593 | chr5:169123192 | DOCK2 | 0.853   | 0.001 |
| cg15907287 | chr5:169127853 | DOCK2 | 0.063   | 0.011 |
| cg14693941 | chr5:169128366 | DOCK2 | 0.865   | 0.003 |
| cg25076039 | chr5:169128937 | DOCK2 | 0.670   | 0.008 |
| cg12194596 | chr5:169129467 | DOCK2 | 0.451   | 0.002 |
| cg06740179 | chr5:169129904 | DOCK2 | 0.774   | 0.003 |
| cg17103579 | chr5:169130793 | DOCK2 | 0.418   | 0.003 |
| cg05049849 | chr5:169130921 | DOCK2 | 0.123   | 0.002 |
| cg27063969 | chr5:169133966 | DOCK2 | 0.007   | 0.059 |
| cg04730794 | chr5:169144438 | DOCK2 | 0.796   | 0.095 |

|            |                |       |       |       |
|------------|----------------|-------|-------|-------|
| cg07775790 | chr5:169145735 | DOCK2 | 0.620 | 0.007 |
| cg26982433 | chr5:169146570 | DOCK2 | 0.149 | 0.013 |
| cg12476579 | chr5:169172387 | DOCK2 | 0.203 | 0.011 |
| cg04218566 | chr5:169172394 | DOCK2 | 0.435 | 0.001 |
| cg15540410 | chr5:169173591 | DOCK2 | 0.089 | 0.011 |
| cg16655018 | chr5:169180894 | DOCK2 | 0.207 | 0.001 |
| cg04622239 | chr5:169186713 | DOCK2 | 0.258 | 0.003 |
| cg04188510 | chr5:169187197 | DOCK2 | 0.034 | 0.004 |
| cg08477000 | chr5:169187218 | DOCK2 | 0.267 | 0.004 |
| cg10388716 | chr5:169187711 | DOCK2 | 0.759 | 0.001 |
| cg16512449 | chr5:169189786 | DOCK2 | 0.419 | 0.003 |
| cg01057132 | chr5:169190508 | DOCK2 | 0.176 | 0.004 |
| cg16734895 | chr5:169190729 | DOCK2 | 0.977 | 0.001 |
| cg22405527 | chr5:169195272 | DOCK2 | 0.302 | 0.003 |
| cg16294838 | chr5:169195305 | DOCK2 | 0.305 | 0.006 |
| cg21081460 | chr5:169205645 | DOCK2 | 0.055 | 0.010 |
| cg03727248 | chr5:169206480 | DOCK2 | 0.104 | 0.004 |
| cg05032797 | chr5:169206942 | DOCK2 | 0.010 | 0.013 |
| cg16642321 | chr5:169207494 | DOCK2 | 0.951 | 0.005 |
| cg22244703 | chr5:169207793 | DOCK2 | 0.301 | 0.000 |
| cg02732152 | chr5:169217409 | DOCK2 | 0.673 | 0.006 |
| cg04712944 | chr5:169222165 | DOCK2 | 0.203 | 0.000 |
| cg05008366 | chr5:169225981 | DOCK2 | 0.065 | 0.007 |
| cg16425799 | chr5:169230162 | DOCK2 | 1.000 | 0.080 |
| cg12064462 | chr5:169233972 | DOCK2 | 0.450 | 0.002 |
| cg22004241 | chr5:169235259 | DOCK2 | 0.652 | 0.013 |
| cg23477774 | chr5:169235791 | DOCK2 | 0.116 | 0.009 |
| cg17203784 | chr5:169254018 | DOCK2 | 0.981 | 0.007 |
| cg01045896 | chr5:169255151 | DOCK2 | 0.228 | 0.017 |
| cg21131622 | chr5:169259493 | DOCK2 | 0.641 | 0.011 |
| cg04935901 | chr5:169275460 | DOCK2 | 0.752 | 0.002 |
| cg25429945 | chr5:169277675 | DOCK2 | 0.510 | 0.000 |
| cg19260875 | chr5:169283683 | DOCK2 | 0.439 | 0.019 |
| cg18460239 | chr5:169287675 | DOCK2 | 0.166 | 0.027 |
| cg07442040 | chr5:169289365 | DOCK2 | 0.016 | 0.013 |
| cg25513379 | chr5:169308566 | DOCK2 | 0.341 | 0.001 |
| cg04974097 | chr5:169331330 | DOCK2 | 0.513 | 0.006 |
| cg14881923 | chr5:169341945 | DOCK2 | 0.400 | 0.005 |
| cg06987842 | chr5:169350993 | DOCK2 | 0.010 | 0.012 |
| cg26954905 | chr5:169372282 | DOCK2 | 0.920 | 0.000 |
| cg13691641 | chr5:169372529 | DOCK2 | 0.713 | 0.012 |
| cg02909952 | chr5:169404456 | DOCK2 | 0.325 | 0.001 |
| cg10849016 | chr5:169416192 | DOCK2 | 0.009 | 0.021 |
| cg10677105 | chr5:169428710 | DOCK2 | 0.087 | 0.023 |
| cg01376424 | chr5:169434574 | DOCK2 | 0.795 | 0.007 |
| cg23345454 | chr5:169435441 | DOCK2 | 0.318 | 0.005 |



|            |                |         |         |       |
|------------|----------------|---------|---------|-------|
| cg12472117 | chr5:169435729 | DOCK2   | 0.460   | 0.004 |
| cg25458323 | chr5:169467478 | DOCK2   | 0.881   | 0.002 |
| cg04853571 | chr5:169482268 | DOCK2   | 0.540   | 0.002 |
| cg26794227 | chr5:169483131 | DOCK2   | 0.363   | 0.012 |
| cg18458373 | chr5:169483281 | DOCK2   | 0.350   | 0.012 |
| cg14933717 | chr5:169494557 | DOCK2   | 0.269   | 0.016 |
| cg09175734 | chr5:169510081 | DOCK2   | 0.011   | 0.006 |
| cg09513877 | chr5:96111541  | ERAP1   | 0.105   | 0.001 |
| cg08618451 | chr5:96117388  | ERAP1   | 0.496   | 0.001 |
| cg03624563 | chr5:96119711  | ERAP1   | 0.022   | 0.018 |
| cg10827181 | chr5:96120299  | ERAP1   | 0.839   | 0.056 |
| cg08986950 | chr5:96120312  | ERAP1   | 0.454   | 0.084 |
| cg21479525 | chr5:96120323  | ERAP1   | 0.730   | 0.004 |
| cg21221855 | chr5:96122486  | ERAP1   | 0.426   | 0.007 |
| cg00783142 | chr5:96122717  | ERAP1   | 0.017   | 0.011 |
| cg16020556 | chr5:96126443  | ERAP1   | 0.017   | 0.001 |
| cg16492584 | chr5:96139282  | ERAP1   | 0.790   | 0.002 |
| cg00188032 | chr5:96141721  | ERAP1   | 0.277   | 0.013 |
| cg17335701 | chr5:96142712  | ERAP1   | 0.006   | 0.001 |
| cg05466640 | chr5:96143017  | ERAP1   | 0.202   | 0.001 |
| cg08783793 | chr5:96143578  | ERAP1   | 0.059   | 0.000 |
| cg14161426 | chr5:96143592  | ERAP1   | 0.109   | 0.001 |
| cg23215014 | chr5:96143598  | ERAP1   | 0.015   | 0.000 |
| cg08099655 | chr5:96143683  | ERAP1   | 0.001   | 0.001 |
| cg23602777 | chr5:96143688  | ERAP1   | 0.506   | 0.000 |
| cg09882587 | chr5:96143769  | ERAP1   | 0.011   | 0.000 |
| cg26474110 | chr5:96143884  | ERAP1   | 0.761   | 0.005 |
| cg05612616 | chr5:96143890  | ERAP1   | 0.514   | 0.004 |
| cg05806375 | chr5:96144043  | ERAP1   | 0.058   | 0.002 |
| cg16138854 | chr5:96144076  | ERAP1   | 0.001   | 0.001 |
| cg17522249 | chr5:96144101  | ERAP1   | 0.016   | 0.007 |
| cg12596782 | chr5:96144134  | ERAP1   | 0.051   | 0.003 |
| cg08802853 | chr5:96144179  | ERAP1   | < 0.001 | 0.001 |
| cg01142811 | chr5:96144364  | ERAP1   | 0.055   | 0.002 |
| cg11789040 | chr5:96149885  | ERAP1   | 0.561   | 0.008 |
| cg11346550 | chr5:96149902  | ERAP1   | 0.991   | 0.029 |
| cg02301737 | chr5:96150434  | ERAP1   | 0.864   | 0.003 |
| cg20661523 | chr5:96150454  | ERAP1   | 0.538   | 0.006 |
| cg22272711 | chr5:96150588  | ERAP1   | 0.100   | 0.002 |
| cg02771117 | chr8:11279352  | FAM167A | 0.096   | 0.055 |
| cg17014292 | chr8:11280085  | FAM167A | 0.685   | 0.061 |
| cg07195258 | chr8:11281040  | FAM167A | 0.026   | 0.002 |
| cg19520497 | chr8:11282761  | FAM167A | 0.625   | 0.002 |
| cg16105891 | chr8:11287161  | FAM167A | 0.595   | 0.006 |
| cg05878854 | chr8:11288512  | FAM167A | 0.947   | 0.005 |
| cg17653522 | chr8:11289465  | FAM167A | 0.616   | 0.003 |

|            |                |         |       |       |
|------------|----------------|---------|-------|-------|
| cg24094087 | chr8:11290839  | FAM167A | 0.399 | 0.001 |
| cg18080662 | chr8:11290916  | FAM167A | 0.230 | 0.000 |
| cg07012910 | chr8:11291279  | FAM167A | 0.239 | 0.003 |
| cg01153199 | chr8:11291623  | FAM167A | 0.277 | 0.008 |
| cg06253903 | chr8:11295210  | FAM167A | 0.673 | 0.006 |
| cg10787818 | chr8:11296220  | FAM167A | 0.148 | 0.003 |
| cg02621357 | chr8:11296980  | FAM167A | 0.161 | 0.001 |
| cg10349166 | chr8:11301373  | FAM167A | 0.786 | 0.024 |
| cg15137355 | chr8:11302030  | FAM167A | 0.865 | 0.012 |
| cg16824901 | chr8:11302243  | FAM167A | 0.025 | 0.004 |
| cg15828860 | chr8:11302429  | FAM167A | 0.023 | 0.000 |
| cg01838251 | chr8:11302452  | FAM167A | 0.240 | 0.003 |
| cg26274995 | chr8:11302983  | FAM167A | 0.763 | 0.006 |
| cg06551905 | chr8:11303039  | FAM167A | 0.775 | 0.026 |
| cg11661318 | chr8:11303067  | FAM167A | 0.005 | 0.000 |
| cg14356811 | chr8:11303794  | FAM167A | 0.155 | 0.001 |
| cg11879734 | chr8:11304095  | FAM167A | 0.182 | 0.012 |
| cg06618371 | chr8:11304969  | FAM167A | 0.345 | 0.002 |
| cg24453881 | chr8:11308943  | FAM167A | 0.042 | 0.002 |
| cg17444442 | chr8:11310246  | FAM167A | 0.134 | 0.005 |
| cg08224773 | chr8:11311868  | FAM167A | 0.885 | 0.017 |
| cg22022922 | chr8:11314934  | FAM167A | 0.103 | 0.044 |
| cg24869116 | chr8:11315529  | FAM167A | 0.049 | 0.068 |
| cg23307893 | chr8:11315562  | FAM167A | 0.322 | 0.048 |
| cg25973153 | chr8:11319359  | FAM167A | 0.495 | 0.004 |
| cg11944933 | chr8:11320112  | FAM167A | 0.782 | 0.004 |
| cg02462837 | chr8:11322452  | FAM167A | 0.782 | 0.073 |
| cg03803614 | chr8:11322979  | FAM167A | 0.386 | 0.002 |
| cg01383082 | chr8:11323474  | FAM167A | 0.443 | 0.007 |
| cg27224195 | chr8:11324244  | FAM167A | 0.010 | 0.001 |
| cg10220992 | chr8:11324327  | FAM167A | 0.030 | 0.001 |
| cg08050536 | chr8:11324435  | FAM167A | 0.117 | 0.000 |
| cg12094006 | chr8:11324446  | FAM167A | 0.071 | 0.004 |
| cg07392449 | chr8:11324666  | FAM167A | 0.646 | 0.000 |
| cg12265959 | chr8:11324687  | FAM167A | 0.042 | 0.007 |
| cg20717059 | chr8:11324817  | FAM167A | 0.020 | 0.003 |
| cg04048557 | chr8:11325201  | FAM167A | 0.371 | 0.001 |
| cg05840795 | chr8:11325356  | FAM167A | 0.053 | 0.001 |
| cg03496850 | chr1:161474143 | FCGR2A  | 0.037 | 0.006 |
| cg25378117 | chr1:161474586 | FCGR2A  | 0.113 | 0.002 |
| cg06350097 | chr1:161474970 | FCGR2A  | 0.481 | 0.016 |
| cg25255913 | chr1:161475031 | FCGR2A  | 0.793 | 0.051 |
| cg04008427 | chr1:161475057 | FCGR2A  | 0.585 | 0.042 |
| cg27470554 | chr1:161475240 | FCGR2A  | 0.526 | 0.042 |
| cg27565811 | chr1:161475869 | FCGR2A  | 0.118 | 0.014 |
| cg13817826 | chr1:161475991 | FCGR2A  | 0.201 | 0.014 |

|            |                |          |       |       |
|------------|----------------|----------|-------|-------|
| cg14831003 | chr1:161481799 | FCGR2A   | 0.004 | 0.018 |
| cg13890597 | chr1:161481847 | FCGR2A   | 0.055 | 0.003 |
| cg14628911 | chr1:161482791 | FCGR2A   | 0.461 | 0.005 |
| cg18073883 | chr6:32780861  | HLA-DOB  | 0.656 | 0.003 |
| cg03530983 | chr6:32781171  | HLA-DOB  | 0.318 | 0.003 |
| cg03083146 | chr6:32781235  | HLA-DOB  | 0.104 | 0.002 |
| cg22016094 | chr6:32781261  | HLA-DOB  | 0.124 | 0.000 |
| cg11239749 | chr6:32781307  | HLA-DOB  | 0.066 | 0.000 |
| cg09889987 | chr6:32782136  | HLA-DOB  | 0.857 | 0.011 |
| cg21454965 | chr6:32782405  | HLA-DOB  | 0.599 | 0.020 |
| cg02010152 | chr6:32782617  | HLA-DOB  | 0.645 | 0.008 |
| cg03477130 | chr6:32782796  | HLA-DOB  | 0.497 | 0.005 |
| cg10294956 | chr6:32782845  | HLA-DOB  | 0.347 | 0.002 |
| cg11469594 | chr6:32783046  | HLA-DOB  | 0.984 | 0.038 |
| cg08905753 | chr6:32783347  | HLA-DOB  | 0.670 | 0.001 |
| cg00409309 | chr6:32783551  | HLA-DOB  | 0.144 | 0.004 |
| cg27246453 | chr6:32783881  | HLA-DOB  | 0.480 | 0.073 |
| cg04576021 | chr6:32784255  | HLA-DOB  | 0.329 | 0.014 |
| cg01530082 | chr6:32784327  | HLA-DOB  | 0.045 | 0.005 |
| cg17369196 | chr6:32784487  | HLA-DOB  | 0.031 | 0.006 |
| cg01493678 | chr6:32784825  | HLA-DOB  | 0.267 | 0.044 |
| cg19301366 | chr6:32627845  | HLA-DQB1 | 0.381 | 0.050 |
| cg14323910 | chr6:32628305  | HLA-DQB1 | 0.781 | 0.026 |
| cg09555323 | chr6:32629786  | HLA-DQB1 | 0.891 | 0.004 |
| cg21493951 | chr6:32632338  | HLA-DQB1 | 0.630 | 0.018 |
| cg24376311 | chr6:32632788  | HLA-DQB1 | 0.042 | 0.001 |
| cg03461499 | chr6:32632790  | HLA-DQB1 | 0.469 | 0.007 |
| cg23967822 | chr6:32632961  | HLA-DQB1 | 0.041 | 0.000 |
| cg03403720 | chr6:32632970  | HLA-DQB1 | 0.293 | 0.004 |
| cg27196273 | chr6:32632992  | HLA-DQB1 | 0.356 | 0.000 |
| cg13047157 | chr6:32633114  | HLA-DQB1 | 0.262 | 0.007 |
| cg24593918 | chr6:32633157  | HLA-DQB1 | 0.634 | 0.006 |
| cg23464743 | chr6:32633163  | HLA-DQB1 | 0.337 | 0.009 |
| cg04696840 | chr6:32633354  | HLA-DQB1 | 0.650 | 0.010 |
| cg13353717 | chr6:32634276  | HLA-DQB1 | 0.999 | 0.027 |
| cg11986643 | chr6:32634316  | HLA-DQB1 | 0.906 | 0.012 |
| cg23336481 | chr6:32634344  | HLA-DQB1 | 0.888 | 0.001 |
| cg05724777 | chr6:32634362  | HLA-DQB1 | 0.756 | 0.005 |
| cg15752756 | chr6:32634481  | HLA-DQB1 | 0.613 | 0.029 |
| cg04090745 | chr6:32724369  | HLA-DQB2 | 0.012 | 0.044 |
| cg17360552 | chr6:32725332  | HLA-DQB2 | 0.519 | 0.005 |
| cg07739876 | chr6:32725377  | HLA-DQB2 | 0.861 | 0.000 |
| cg21013323 | chr6:32726567  | HLA-DQB2 | 0.961 | 0.011 |
| cg24307229 | chr6:32726626  | HLA-DQB2 | 0.611 | 0.003 |
| cg20985082 | chr6:32727265  | HLA-DQB2 | 0.784 | 0.002 |
| cg12296550 | chr6:32728862  | HLA-DQB2 | 0.950 | 0.005 |

|            |                |          |       |       |
|------------|----------------|----------|-------|-------|
| cg06423300 | chr6:32729059  | HLA-DQB2 | 0.117 | 0.003 |
| cg25136631 | chr6:32729105  | HLA-DQB2 | 0.776 | 0.009 |
| cg14255617 | chr6:32729118  | HLA-DQB2 | 0.948 | 0.009 |
| cg07180897 | chr6:32729130  | HLA-DQB2 | 0.780 | 0.004 |
| cg04418355 | chr6:32729174  | HLA-DQB2 | 0.626 | 0.016 |
| cg20645912 | chr6:32729274  | HLA-DQB2 | 0.092 | 0.034 |
| cg13896204 | chr6:32729442  | HLA-DQB2 | 0.647 | 0.013 |
| cg09739413 | chr6:32729498  | HLA-DQB2 | 0.871 | 0.027 |
| cg14441480 | chr6:32729500  | HLA-DQB2 | 0.863 | 0.020 |
| cg02964065 | chr6:32729545  | HLA-DQB2 | 0.821 | 0.039 |
| cg15255946 | chr6:32729563  | HLA-DQB2 | 0.919 | 0.022 |
| cg18026055 | chr6:32729596  | HLA-DQB2 | 0.860 | 0.023 |
| cg18609891 | chr6:32729647  | HLA-DQB2 | 0.149 | 0.009 |
| cg03638120 | chr6:32729720  | HLA-DQB2 | 0.883 | 0.032 |
| cg17475271 | chr6:32729741  | HLA-DQB2 | 0.951 | 0.009 |
| cg04322111 | chr6:32729764  | HLA-DQB2 | 0.573 | 0.011 |
| cg25327122 | chr6:32729782  | HLA-DQB2 | 0.731 | 0.007 |
| cg10218546 | chr6:32729823  | HLA-DQB2 | 0.576 | 0.012 |
| cg19939773 | chr6:32729876  | HLA-DQB2 | 0.282 | 0.002 |
| cg11530659 | chr6:32730001  | HLA-DQB2 | 0.770 | 0.004 |
| cg15615586 | chr6:32730040  | HLA-DQB2 | 0.318 | 0.000 |
| cg10298215 | chr6:32730046  | HLA-DQB2 | 0.970 | 0.004 |
| cg23831898 | chr6:32730130  | HLA-DQB2 | 0.097 | 0.028 |
| cg11505404 | chr6:32730243  | HLA-DQB2 | 0.810 | 0.002 |
| cg21810004 | chr6:32730299  | HLA-DQB2 | 0.214 | 0.000 |
| cg21038932 | chr6:32730859  | HLA-DQB2 | 0.263 | 0.011 |
| cg24892091 | chr6:32731127  | HLA-DQB2 | 0.722 | 0.007 |
| cg23743845 | chr6:32732247  | HLA-DQB2 | 0.096 | 0.003 |
| cg16315262 | chr6:32732371  | HLA-DQB2 | 0.019 | 0.006 |
| cg21566383 | chr6:32732764  | HLA-DQB2 | 0.790 | 0.006 |
| cg06530742 | chr19:41223047 | ITPKC    | 0.012 | 0.001 |
| cg00384577 | chr19:41223078 | ITPKC    | 0.457 | 0.000 |
| cg08162337 | chr19:41223262 | ITPKC    | 0.056 | 0.002 |
| cg16477324 | chr19:41223331 | ITPKC    | 0.361 | 0.001 |
| cg11601297 | chr19:41224147 | ITPKC    | 0.018 | 0.037 |
| cg21869046 | chr19:41225005 | ITPKC    | 0.147 | 0.003 |
| cg27160007 | chr19:41225374 | ITPKC    | 0.248 | 0.013 |
| cg20228862 | chr19:41226560 | ITPKC    | 0.672 | 0.087 |
| cg24099241 | chr19:41241624 | ITPKC    | 0.137 | 0.028 |
| cg01481182 | chr19:41245074 | ITPKC    | 0.619 | 0.026 |
| cg21202522 | chr19:41245574 | ITPKC    | 0.252 | 0.027 |
| cg12879242 | chr5:113696517 | KCNN2    | 0.008 | 0.003 |
| cg14511800 | chr5:113696564 | KCNN2    | 0.022 | 0.003 |
| cg01395723 | chr5:113696634 | KCNN2    | 0.015 | 0.000 |
| cg16430072 | chr5:113696863 | KCNN2    | 0.010 | 0.005 |
| cg26063563 | chr5:113697330 | KCNN2    | 0.003 | 0.001 |

|            |                |       |         |       |
|------------|----------------|-------|---------|-------|
| cg01939336 | chr5:113697487 | KCNN2 | 0.003   | 0.001 |
| cg23615676 | chr5:113697632 | KCNN2 | 0.212   | 0.013 |
| cg05457273 | chr5:113697649 | KCNN2 | 0.016   | 0.001 |
| cg07131533 | chr5:113697861 | KCNN2 | < 0.001 | 0.002 |
| cg18717628 | chr5:113697892 | KCNN2 | 0.002   | 0.001 |
| cg01894048 | chr5:113697895 | KCNN2 | 0.026   | 0.001 |
| cg18422875 | chr5:113697897 | KCNN2 | 0.012   | 0.000 |
| cg23037611 | chr5:113697946 | KCNN2 | < 0.001 | 0.007 |
| cg12373617 | chr5:113698140 | KCNN2 | 0.003   | 0.002 |
| cg27403635 | chr5:113698291 | KCNN2 | 0.115   | 0.018 |
| cg24830738 | chr5:113698445 | KCNN2 | 0.003   | 0.008 |
| cg07035165 | chr5:113698506 | KCNN2 | 0.001   | 0.000 |
| cg03264444 | chr5:113698664 | KCNN2 | 0.010   | 0.004 |
| cg26691307 | chr5:113698769 | KCNN2 | 0.246   | 0.013 |
| cg15026311 | chr5:113698775 | KCNN2 | 0.015   | 0.009 |
| cg20930366 | chr5:113698847 | KCNN2 | 0.215   | 0.003 |
| cg24304919 | chr5:113699194 | KCNN2 | < 0.001 | 0.015 |
| cg04996277 | chr5:113699342 | KCNN2 | 0.128   | 0.019 |
| cg15851052 | chr5:113699543 | KCNN2 | 0.011   | 0.004 |
| cg25194822 | chr5:113699604 | KCNN2 | 0.949   | 0.002 |
| cg11712506 | chr5:113699683 | KCNN2 | 0.904   | 0.001 |
| cg11204913 | chr5:113717301 | KCNN2 | 0.608   | 0.002 |
| cg22140583 | chr5:113723647 | KCNN2 | 0.926   | 0.001 |
| cg11128704 | chr5:113725326 | KCNN2 | 0.624   | 0.011 |
| cg19062099 | chr5:113744106 | KCNN2 | 0.417   | 0.021 |
| cg04843564 | chr5:113748800 | KCNN2 | 0.492   | 0.019 |
| cg23248051 | chr5:113753120 | KCNN2 | 0.581   | 0.001 |
| cg08899474 | chr5:113754185 | KCNN2 | 0.405   | 0.015 |
| cg23216963 | chr5:113767813 | KCNN2 | 0.995   | 0.000 |
| cg25243496 | chr5:113770075 | KCNN2 | 0.015   | 0.022 |
| cg08918534 | chr5:113783269 | KCNN2 | 0.056   | 0.000 |
| cg14558673 | chr5:113785032 | KCNN2 | 0.977   | 0.004 |
| cg01624235 | chr5:113785786 | KCNN2 | 0.056   | 0.007 |
| cg14959824 | chr5:113786081 | KCNN2 | 0.033   | 0.008 |
| cg25486361 | chr5:113805552 | KCNN2 | 0.057   | 0.017 |
| cg17431952 | chr5:113806337 | KCNN2 | 0.235   | 0.033 |
| cg10365469 | chr6:168417097 | KIF25 | 0.057   | 0.002 |
| cg19252565 | chr6:168417126 | KIF25 | 0.701   | 0.001 |
| cg18009322 | chr6:168417574 | KIF25 | 0.763   | 0.007 |
| cg15371806 | chr6:168417634 | KIF25 | 0.985   | 0.002 |
| cg04680494 | chr6:168417646 | KIF25 | 0.305   | 0.001 |
| cg02073839 | chr6:168417743 | KIF25 | 0.062   | 0.003 |
| cg17001430 | chr6:168418276 | KIF25 | 0.280   | 0.006 |
| cg16912129 | chr6:168418398 | KIF25 | 0.224   | 0.006 |
| cg12707343 | chr6:168418439 | KIF25 | 0.503   | 0.002 |
| cg11186282 | chr6:168418442 | KIF25 | 0.701   | 0.001 |

|            |                |       |       |       |
|------------|----------------|-------|-------|-------|
| cg03270619 | chr6:168418454 | KIF25 | 0.485 | 0.003 |
| cg05392263 | chr6:168418527 | KIF25 | 0.585 | 0.018 |
| cg13770417 | chr6:168418632 | KIF25 | 0.778 | 0.009 |
| cg03662475 | chr6:168419522 | KIF25 | 0.708 | 0.003 |
| cg09545394 | chr6:168419691 | KIF25 | 0.774 | 0.001 |
| cg16038269 | chr6:168420197 | KIF25 | 0.259 | 0.005 |
| cg01878651 | chr6:168420296 | KIF25 | 0.891 | 0.006 |
| cg18761763 | chr6:168424818 | KIF25 | 0.166 | 0.006 |
| cg10532440 | chr6:168424986 | KIF25 | 0.210 | 0.001 |
| cg05031152 | chr6:168425279 | KIF25 | 0.341 | 0.004 |
| cg16895216 | chr6:168426063 | KIF25 | 0.358 | 0.005 |
| cg04090349 | chr6:168426082 | KIF25 | 0.091 | 0.008 |
| cg21962025 | chr6:168426201 | KIF25 | 0.241 | 0.006 |
| cg10146514 | chr6:168426308 | KIF25 | 0.846 | 0.005 |
| cg11942669 | chr6:168426326 | KIF25 | 0.247 | 0.006 |
| cg05060686 | chr6:168426413 | KIF25 | 0.809 | 0.019 |
| cg03001276 | chr6:168426653 | KIF25 | 0.900 | 0.002 |
| cg21906947 | chr6:168426664 | KIF25 | 0.167 | 0.002 |
| cg13314057 | chr6:168428430 | KIF25 | 0.727 | 0.002 |
| cg05282968 | chr6:168428477 | KIF25 | 0.827 | 0.001 |
| cg23823000 | chr6:168433191 | KIF25 | 0.609 | 0.006 |
| cg21477075 | chr6:168433436 | KIF25 | 0.707 | 0.012 |
| cg09573356 | chr6:168433798 | KIF25 | 0.428 | 0.004 |
| cg11470213 | chr6:168434524 | KIF25 | 0.018 | 0.010 |
| cg01134139 | chr6:168435636 | KIF25 | 0.050 | 0.009 |
| cg24246628 | chr6:168435914 | KIF25 | 0.130 | 0.013 |
| cg18319852 | chr6:168436099 | KIF25 | 0.022 | 0.006 |
| cg14316629 | chr6:168436353 | KIF25 | 0.145 | 0.042 |
| cg17263665 | chr6:168436795 | KIF25 | 0.110 | 0.011 |
| cg09187944 | chr6:168437166 | KIF25 | 0.505 | 0.010 |
| cg21832294 | chr6:168438078 | KIF25 | 0.332 | 0.005 |
| cg04775383 | chr6:168439228 | KIF25 | 0.198 | 0.003 |
| cg16320173 | chr6:168443003 | KIF25 | 0.214 | 0.002 |
| cg25008524 | chr6:168443212 | KIF25 | 0.069 | 0.004 |
| cg20456465 | chr6:168443223 | KIF25 | 0.015 | 0.001 |
| cg15770012 | chr6:168443352 | KIF25 | 0.871 | 0.006 |
| cg01259258 | chr6:168443958 | KIF25 | 0.184 | 0.013 |
| cg02325163 | chr6:168444241 | KIF25 | 0.171 | 0.009 |
| cg03119088 | chr6:168445176 | KIF25 | 0.743 | 0.008 |
| cg02172773 | chr6:168445570 | KIF25 | 0.500 | 0.005 |
| cg21045072 | chr6:168445596 | KIF25 | 0.465 | 0.004 |
| cg11762760 | chr6:168445614 | KIF25 | 0.209 | 0.003 |
| cg07744273 | chr6:31538524  | LTA   | 0.006 | 0.000 |
| cg20330447 | chr6:31539539  | LTA   | 0.078 | 0.039 |
| cg14441276 | chr6:31539735  | LTA   | 0.468 | 0.073 |
| cg09621572 | chr6:31539973  | LTA   | 0.901 | 0.084 |

|            |                |        |       |       |
|------------|----------------|--------|-------|-------|
| cg14437551 | chr6:31539986  | LTA    | 0.895 | 0.090 |
| cg14597739 | chr6:31539998  | LTA    | 0.848 | 0.065 |
| cg16219283 | chr6:31540002  | LTA    | 0.813 | 0.072 |
| cg21999229 | chr6:31540014  | LTA    | 0.672 | 0.084 |
| cg17169196 | chr6:31540026  | LTA    | 0.504 | 0.084 |
| cg02402436 | chr6:31540051  | LTA    | 0.735 | 0.071 |
| cg09736959 | chr6:31540114  | LTA    | 0.765 | 0.039 |
| cg24216966 | chr6:31540121  | LTA    | 0.468 | 0.060 |
| cg11586857 | chr6:31540136  | LTA    | 0.899 | 0.045 |
| cg22318806 | chr6:31540411  | LTA    | 0.607 | 0.037 |
| cg13815684 | chr6:31540440  | LTA    | 0.931 | 0.036 |
| cg17709873 | chr6:31540456  | LTA    | 0.666 | 0.042 |
| cg26348243 | chr6:31540461  | LTA    | 0.536 | 0.059 |
| cg00501919 | chr6:31540750  | LTA    | 0.132 | 0.054 |
| cg03599224 | chr6:31541349  | LTA    | 0.004 | 0.017 |
| cg21240855 | chr6:31541461  | LTA    | 0.257 | 0.007 |
| cg14910524 | chr6:31541948  | LTA    | 0.970 | 0.011 |
| cg08191289 | chr9:139981328 | MAN1B1 | 0.789 | 0.001 |
| cg10443823 | chr9:139981335 | MAN1B1 | 0.005 | 0.001 |
| cg14604489 | chr9:139982149 | MAN1B1 | 0.489 | 0.001 |
| cg12849357 | chr9:139982935 | MAN1B1 | 0.230 | 0.002 |
| cg22768226 | chr9:139983579 | MAN1B1 | 0.024 | 0.007 |
| cg09911052 | chr9:139983593 | MAN1B1 | 0.201 | 0.003 |
| cg15332579 | chr9:139984577 | MAN1B1 | 0.002 | 0.007 |
| cg13669188 | chr9:139984628 | MAN1B1 | 0.069 | 0.010 |
| cg20376312 | chr9:139987318 | MAN1B1 | 0.266 | 0.002 |
| cg03936816 | chr9:139988774 | MAN1B1 | 0.196 | 0.001 |
| cg04127242 | chr9:139990710 | MAN1B1 | 0.231 | 0.094 |
| cg13614712 | chr9:139994787 | MAN1B1 | 0.861 | 0.001 |
| cg10706861 | chr9:139996153 | MAN1B1 | 0.658 | 0.005 |
| cg17660010 | chr9:139997767 | MAN1B1 | 0.821 | 0.004 |
| cg00000658 | chr9:139997924 | MAN1B1 | 0.230 | 0.003 |
| cg17391845 | chr9:139998169 | MAN1B1 | 0.676 | 0.003 |
| cg14864856 | chr9:139998656 | MAN1B1 | 0.561 | 0.005 |
| cg14244793 | chr9:139999038 | MAN1B1 | 0.942 | 0.008 |
| cg13712518 | chr9:140001096 | MAN1B1 | 0.229 | 0.001 |
| cg09325123 | chr9:140001553 | MAN1B1 | 0.067 | 0.002 |
| cg14578358 | chr9:140001730 | MAN1B1 | 0.071 | 0.010 |
| cg13907059 | chr9:140002893 | MAN1B1 | 0.457 | 0.001 |
| cg14015002 | chr9:140003378 | MAN1B1 | 0.082 | 0.002 |
| cg13592750 | chr9:140003531 | MAN1B1 | 0.364 | 0.006 |
| cg19986979 | chr19:41280014 | MIA    | 0.567 | 0.004 |
| cg24734430 | chr19:41280661 | MIA    | 0.521 | 0.000 |
| cg25152942 | chr19:41281080 | MIA    | 0.171 | 0.002 |
| cg24083702 | chr19:41281104 | MIA    | 0.082 | 0.001 |
| cg19023552 | chr19:41281446 | MIA    | 0.015 | 0.009 |

|            |                |          |       |       |
|------------|----------------|----------|-------|-------|
| cg26783251 | chr19:41282678 | MIA      | 0.004 | 0.008 |
| cg26588045 | chr19:41283090 | MIA      | 0.080 | 0.014 |
| cg01967317 | chr3:174576186 | NAALADL2 | 0.913 | 0.024 |
| cg15622493 | chr3:174576569 | NAALADL2 | 0.051 | 0.034 |
| cg20480368 | chr3:174576768 | NAALADL2 | 0.117 | 0.002 |
| cg04862404 | chr3:174577336 | NAALADL2 | 0.316 | 0.009 |
| cg21145449 | chr3:174580620 | NAALADL2 | 0.368 | 0.001 |
| cg16636878 | chr3:174581008 | NAALADL2 | 0.512 | 0.002 |
| cg05816018 | chr3:174609779 | NAALADL2 | 0.628 | 0.010 |
| cg11632652 | chr3:174648902 | NAALADL2 | 0.031 | 0.007 |
| cg00315255 | chr3:174675825 | NAALADL2 | 0.219 | 0.000 |
| cg19325051 | chr3:174691490 | NAALADL2 | 0.592 | 0.008 |
| cg03525956 | chr3:174720287 | NAALADL2 | 0.109 | 0.010 |
| cg14508517 | chr3:174722125 | NAALADL2 | 0.156 | 0.007 |
| cg11775608 | chr3:174759453 | NAALADL2 | 0.111 | 0.011 |
| cg24575651 | chr3:174764477 | NAALADL2 | 0.036 | 0.013 |
| cg09602541 | chr3:174792068 | NAALADL2 | 0.074 | 0.006 |
| cg25488905 | chr3:174838992 | NAALADL2 | 0.036 | 0.014 |
| cg17095685 | chr3:174841409 | NAALADL2 | 0.849 | 0.006 |
| cg15294279 | chr3:174842010 | NAALADL2 | 0.187 | 0.038 |
| cg16964064 | chr3:174844917 | NAALADL2 | 0.013 | 0.009 |
| cg07601747 | chr3:174849894 | NAALADL2 | 0.011 | 0.014 |
| cg17371709 | chr3:174910525 | NAALADL2 | 0.240 | 0.019 |
| cg06588542 | chr3:174911832 | NAALADL2 | 0.969 | 0.008 |
| cg01295999 | chr3:174926334 | NAALADL2 | 0.331 | 0.003 |
| cg11358672 | chr3:174930635 | NAALADL2 | 0.455 | 0.003 |
| cg01379656 | chr3:174970696 | NAALADL2 | 0.316 | 0.041 |
| cg04784618 | chr3:174988389 | NAALADL2 | 0.868 | 0.001 |
| cg08398040 | chr3:175005497 | NAALADL2 | 0.471 | 0.002 |
| cg01546106 | chr3:175052712 | NAALADL2 | 0.839 | 0.002 |
| cg09890077 | chr3:175056652 | NAALADL2 | 0.580 | 0.006 |
| cg14368211 | chr3:175056871 | NAALADL2 | 0.775 | 0.002 |
| cg09506255 | chr3:175060294 | NAALADL2 | 0.011 | 0.042 |
| cg16953031 | chr3:175064540 | NAALADL2 | 0.271 | 0.006 |
| cg14249533 | chr3:175064553 | NAALADL2 | 0.900 | 0.005 |
| cg12680346 | chr3:175065007 | NAALADL2 | 0.819 | 0.014 |
| cg12817517 | chr3:175067212 | NAALADL2 | 0.735 | 0.007 |
| cg04108951 | chr3:175074521 | NAALADL2 | 0.429 | 0.015 |
| cg14531201 | chr3:175104640 | NAALADL2 | 0.313 | 0.002 |
| cg09620585 | chr3:175115181 | NAALADL2 | 0.730 | 0.004 |
| cg19776822 | chr3:175115484 | NAALADL2 | 0.843 | 0.009 |
| cg05279806 | chr3:175128616 | NAALADL2 | 0.820 | 0.005 |
| cg01150105 | chr3:175139160 | NAALADL2 | 0.326 | 0.005 |
| cg24063405 | chr3:175202526 | NAALADL2 | 0.046 | 0.016 |
| cg16994572 | chr3:175204162 | NAALADL2 | 0.588 | 0.025 |
| cg20051133 | chr3:175213208 | NAALADL2 | 0.364 | 0.010 |



|            |                |          |       |       |
|------------|----------------|----------|-------|-------|
| cg19399866 | chr3:175213444 | NAALADL2 | 0.286 | 0.000 |
| cg14250740 | chr3:175244596 | NAALADL2 | 0.007 | 0.000 |
| cg18290666 | chr3:175308718 | NAALADL2 | 0.363 | 0.007 |
| cg09439444 | chr3:175326342 | NAALADL2 | 0.681 | 0.005 |
| cg17590835 | chr3:175326760 | NAALADL2 | 0.332 | 0.022 |
| cg08076814 | chr3:175326825 | NAALADL2 | 0.628 | 0.017 |
| cg16226037 | chr3:175338261 | NAALADL2 | 0.828 | 0.005 |
| cg22464200 | chr3:175338357 | NAALADL2 | 0.993 | 0.014 |
| cg06296773 | chr3:175338547 | NAALADL2 | 0.651 | 0.004 |
| cg22156300 | chr3:175338899 | NAALADL2 | 0.232 | 0.008 |
| cg09717471 | chr3:175338908 | NAALADL2 | 0.503 | 0.004 |
| cg08995613 | chr3:175390218 | NAALADL2 | 0.726 | 0.001 |
| cg02245488 | chr3:175449439 | NAALADL2 | 0.764 | 0.009 |
| cg19812670 | chr3:175461357 | NAALADL2 | 0.762 | 0.021 |
| cg15672986 | chr3:175465989 | NAALADL2 | 0.566 | 0.015 |
| cg00363658 | chr3:175484022 | NAALADL2 | 0.487 | 0.012 |
| cg09969640 | chr3:175484137 | NAALADL2 | 0.013 | 0.026 |
| cg04998970 | chr3:175484712 | NAALADL2 | 0.734 | 0.009 |
| cg02313589 | chr10:21073164 | NEBL     | 0.518 | 0.005 |
| cg05459252 | chr10:21095355 | NEBL     | 0.422 | 0.000 |
| cg00693776 | chr10:21105179 | NEBL     | 0.496 | 0.006 |
| cg12354307 | chr10:21106596 | NEBL     | 0.592 | 0.008 |
| cg08607662 | chr10:21106764 | NEBL     | 0.091 | 0.009 |
| cg10710988 | chr10:21108410 | NEBL     | 0.414 | 0.000 |
| cg13319203 | chr10:21112834 | NEBL     | 0.068 | 0.009 |
| cg18710812 | chr10:21115407 | NEBL     | 0.238 | 0.006 |
| cg21920074 | chr10:21116172 | NEBL     | 0.298 | 0.001 |
| cg04344600 | chr10:21135411 | NEBL     | 0.631 | 0.005 |
| cg05933215 | chr10:21144465 | NEBL     | 0.421 | 0.008 |
| cg15773746 | chr10:21174847 | NEBL     | 0.120 | 0.001 |
| cg06379027 | chr10:21179133 | NEBL     | 0.791 | 0.002 |
| cg26448411 | chr10:21180052 | NEBL     | 0.114 | 0.011 |
| cg03484402 | chr10:21186180 | NEBL     | 0.421 | 0.019 |
| cg11647420 | chr10:21186217 | NEBL     | 0.204 | 0.002 |
| cg09916763 | chr10:21186822 | NEBL     | 0.018 | 0.047 |
| cg19246545 | chr10:21186915 | NEBL     | 0.069 | 0.026 |
| cg03287579 | chr10:21187442 | NEBL     | 0.892 | 0.002 |
| cg17967996 | chr10:21187652 | NEBL     | 0.208 | 0.014 |
| cg04612110 | chr10:21188349 | NEBL     | 0.602 | 0.012 |
| cg14246963 | chr10:21188788 | NEBL     | 0.172 | 0.001 |
| cg05758203 | chr10:21218413 | NEBL     | 0.107 | 0.016 |
| cg06331574 | chr10:21237556 | NEBL     | 0.991 | 0.003 |
| cg24616879 | chr10:21238185 | NEBL     | 0.454 | 0.019 |
| cg02675443 | chr10:21239090 | NEBL     | 0.959 | 0.002 |
| cg16075753 | chr10:21243460 | NEBL     | 0.001 | 0.001 |
| cg12116749 | chr10:21245178 | NEBL     | 0.474 | 0.002 |

|            |                |      |         |       |
|------------|----------------|------|---------|-------|
| cg13581027 | chr10:21246375 | NEBL | 0.284   | 0.003 |
| cg19864972 | chr10:21250957 | NEBL | 0.665   | 0.000 |
| cg14036154 | chr10:21259671 | NEBL | 0.460   | 0.001 |
| cg07702770 | chr10:21260833 | NEBL | 0.076   | 0.030 |
| cg19163398 | chr10:21274961 | NEBL | 0.053   | 0.010 |
| cg13996738 | chr10:21282419 | NEBL | 0.253   | 0.005 |
| cg19636344 | chr10:21304773 | NEBL | 0.817   | 0.004 |
| cg10898402 | chr10:21309578 | NEBL | 0.134   | 0.005 |
| cg13973039 | chr10:21310754 | NEBL | 0.562   | 0.004 |
| cg09992949 | chr10:21317918 | NEBL | 0.300   | 0.005 |
| cg21369919 | chr10:21318882 | NEBL | 0.747   | 0.004 |
| cg10420290 | chr10:21331199 | NEBL | 0.313   | 0.003 |
| cg13769883 | chr10:21333786 | NEBL | 0.204   | 0.006 |
| cg16208523 | chr10:21354627 | NEBL | 0.712   | 0.005 |
| cg01421400 | chr10:21358885 | NEBL | 0.942   | 0.008 |
| cg08762432 | chr10:21358991 | NEBL | 0.698   | 0.009 |
| cg13371840 | chr10:21359107 | NEBL | 0.473   | 0.022 |
| cg22466310 | chr10:21359360 | NEBL | 0.075   | 0.015 |
| cg15664767 | chr10:21359483 | NEBL | 0.541   | 0.011 |
| cg07977230 | chr10:21359702 | NEBL | 0.059   | 0.013 |
| cg04461058 | chr10:21367869 | NEBL | 0.033   | 0.006 |
| cg00186224 | chr10:21369318 | NEBL | 0.134   | 0.022 |
| cg13932637 | chr10:21386726 | NEBL | 0.046   | 0.008 |
| cg05701192 | chr10:21388541 | NEBL | 0.573   | 0.020 |
| cg07100050 | chr10:21390114 | NEBL | 0.704   | 0.029 |
| cg12310370 | chr10:21435534 | NEBL | 0.095   | 0.004 |
| cg16433788 | chr10:21448790 | NEBL | 0.077   | 0.012 |
| cg25200453 | chr10:21450066 | NEBL | 0.817   | 0.003 |
| cg15969702 | chr10:21450711 | NEBL | 0.986   | 0.008 |
| cg07815856 | chr10:21456020 | NEBL | 0.718   | 0.005 |
| cg06411879 | chr10:21456039 | NEBL | 0.545   | 0.023 |
| cg25073701 | chr10:21456093 | NEBL | 0.899   | 0.010 |
| cg14978741 | chr10:21460005 | NEBL | 0.367   | 0.001 |
| cg00833352 | chr10:21461979 | NEBL | 0.315   | 0.004 |
| cg16189346 | chr10:21462094 | NEBL | 0.651   | 0.001 |
| cg22278087 | chr10:21462145 | NEBL | 0.365   | 0.008 |
| cg17426273 | chr10:21462441 | NEBL | 0.779   | 0.004 |
| cg06731125 | chr10:21462653 | NEBL | 0.007   | 0.003 |
| cg27495903 | chr10:21463009 | NEBL | < 0.001 | 0.006 |
| cg11787785 | chr10:21463243 | NEBL | 0.038   | 0.001 |
| cg01960926 | chr10:21463412 | NEBL | 0.200   | 0.004 |
| cg23565942 | chr10:21463485 | NEBL | 0.026   | 0.000 |
| cg18192417 | chr10:21463756 | NEBL | 0.870   | 0.004 |
| cg24625388 | chr10:21463858 | NEBL | 0.667   | 0.036 |
| cg09012594 | chr10:21464258 | NEBL | 0.058   | 0.009 |
| cg13744793 | chr10:21464296 | NEBL | 0.113   | 0.020 |

|            |               |       |         |       |
|------------|---------------|-------|---------|-------|
| cg13101088 | chr2:64320678 | PELI1 | 0.707   | 0.004 |
| cg12126471 | chr2:64322159 | PELI1 | 0.373   | 0.001 |
| cg14842190 | chr2:64327804 | PELI1 | 0.219   | 0.001 |
| cg20016036 | chr2:64332207 | PELI1 | 0.810   | 0.033 |
| cg24953418 | chr2:64336109 | PELI1 | 0.802   | 0.003 |
| cg21954684 | chr2:64341404 | PELI1 | 0.202   | 0.107 |
| cg08485236 | chr2:64343276 | PELI1 | 0.780   | 0.023 |
| cg22496989 | chr2:64348245 | PELI1 | 0.049   | 0.003 |
| cg00638280 | chr2:64349780 | PELI1 | 0.610   | 0.004 |
| cg12094129 | chr2:64356545 | PELI1 | 0.029   | 0.027 |
| cg16878351 | chr2:64360223 | PELI1 | 0.645   | 0.014 |
| cg18721342 | chr2:64361374 | PELI1 | 0.159   | 0.003 |
| cg17634995 | chr2:64362666 | PELI1 | 0.960   | 0.053 |
| cg19835049 | chr2:64365411 | PELI1 | 0.904   | 0.009 |
| cg11727482 | chr2:64368910 | PELI1 | 0.816   | 0.018 |
| cg22603436 | chr2:64370307 | PELI1 | 0.949   | 0.020 |
| cg26248645 | chr2:64370690 | PELI1 | 0.055   | 0.004 |
| cg22795569 | chr2:64371175 | PELI1 | 0.987   | 0.000 |
| cg17364044 | chr2:64371202 | PELI1 | 0.003   | 0.005 |
| cg16513855 | chr2:64371511 | PELI1 | 0.005   | 0.001 |
| cg22352474 | chr2:64371530 | PELI1 | 0.187   | 0.010 |
| cg09976445 | chr2:64371643 | PELI1 | 0.036   | 0.001 |
| cg00446684 | chr2:64371646 | PELI1 | 0.001   | 0.005 |
| cg14735242 | chr2:64371651 | PELI1 | 0.010   | 0.004 |
| cg20739223 | chr2:64371680 | PELI1 | 0.016   | 0.001 |
| cg02063828 | chr2:64371766 | PELI1 | 0.005   | 0.002 |
| cg14060441 | chr2:64371806 | PELI1 | 0.413   | 0.006 |
| cg01689928 | chr2:64371810 | PELI1 | 0.198   | 0.004 |
| cg18706544 | chr2:64371842 | PELI1 | 0.452   | 0.006 |
| cg08471738 | chr2:64373042 | PELI1 | 0.462   | 0.049 |
| cg00222124 | chr6:28248578 | PGBD1 | 0.664   | 0.072 |
| cg07970287 | chr6:28248806 | PGBD1 | 0.521   | 0.003 |
| cg00836800 | chr6:28249106 | PGBD1 | 0.625   | 0.003 |
| cg10680411 | chr6:28249142 | PGBD1 | 0.738   | 0.002 |
| cg07119389 | chr6:28249167 | PGBD1 | 0.227   | 0.005 |
| cg09002836 | chr6:28249205 | PGBD1 | 0.946   | 0.002 |
| cg11259833 | chr6:28249221 | PGBD1 | 0.620   | 0.001 |
| cg05452243 | chr6:28249239 | PGBD1 | 0.967   | 0.001 |
| cg00017002 | chr6:28249251 | PGBD1 | 0.236   | 0.003 |
| cg09804108 | chr6:28249271 | PGBD1 | 0.027   | 0.000 |
| cg06314658 | chr6:28249428 | PGBD1 | 0.002   | 0.003 |
| cg20029652 | chr6:28249545 | PGBD1 | 0.008   | 0.000 |
| cg11664467 | chr6:28249704 | PGBD1 | 0.359   | 0.001 |
| cg14242556 | chr6:28253513 | PGBD1 | 0.267   | 0.006 |
| cg06579459 | chr6:28263113 | PGBD1 | < 0.001 | 0.005 |
| cg09853112 | chr20:8111582 | PLCB1 | 0.286   | 0.001 |

|            |               |       |         |       |
|------------|---------------|-------|---------|-------|
| cg09703163 | chr20:8111613 | PLCB1 | 0.203   | 0.000 |
| cg17252911 | chr20:8112362 | PLCB1 | < 0.001 | 0.002 |
| cg22001510 | chr20:8112368 | PLCB1 | < 0.001 | 0.000 |
| cg14805807 | chr20:8112713 | PLCB1 | < 0.001 | 0.003 |
| cg12496245 | chr20:8112732 | PLCB1 | 0.007   | 0.002 |
| cg15528186 | chr20:8112749 | PLCB1 | 0.006   | 0.002 |
| cg23657409 | chr20:8112754 | PLCB1 | 0.010   | 0.001 |
| cg01431260 | chr20:8112760 | PLCB1 | 0.001   | 0.001 |
| cg21844450 | chr20:8112956 | PLCB1 | 0.028   | 0.003 |
| cg17510056 | chr20:8112972 | PLCB1 | 0.950   | 0.001 |
| cg27591117 | chr20:8113191 | PLCB1 | < 0.001 | 0.001 |
| cg23797439 | chr20:8113355 | PLCB1 | < 0.001 | 0.002 |
| cg13570585 | chr20:8113573 | PLCB1 | 0.032   | 0.002 |
| cg07008386 | chr20:8113630 | PLCB1 | 0.019   | 0.003 |
| cg09286797 | chr20:8116999 | PLCB1 | 0.179   | 0.006 |
| cg17341800 | chr20:8125274 | PLCB1 | 0.798   | 0.010 |
| cg25556087 | chr20:8126124 | PLCB1 | 0.037   | 0.053 |
| cg13788583 | chr20:8132217 | PLCB1 | 0.795   | 0.013 |
| cg18246521 | chr20:8133048 | PLCB1 | 0.885   | 0.079 |
| cg02524009 | chr20:8166645 | PLCB1 | 0.145   | 0.019 |
| cg16712789 | chr20:8189900 | PLCB1 | 0.072   | 0.001 |
| cg16514642 | chr20:8194986 | PLCB1 | 0.072   | 0.005 |
| cg24732404 | chr20:8225365 | PLCB1 | 0.548   | 0.102 |
| cg13836922 | chr20:8227029 | PLCB1 | 0.759   | 0.002 |
| cg05957477 | chr20:8228450 | PLCB1 | 0.379   | 0.018 |
| cg14326161 | chr20:8229198 | PLCB1 | 0.198   | 0.012 |
| cg21174128 | chr20:8229345 | PLCB1 | 0.021   | 0.001 |
| cg23849443 | chr20:8230364 | PLCB1 | 0.246   | 0.025 |
| cg23434070 | chr20:8243123 | PLCB1 | 0.977   | 0.006 |
| cg22748852 | chr20:8255893 | PLCB1 | 0.017   | 0.021 |
| cg01538049 | chr20:8280552 | PLCB1 | 0.249   | 0.020 |
| cg01212167 | chr20:8286191 | PLCB1 | 0.032   | 0.023 |
| cg10236030 | chr20:8286464 | PLCB1 | 0.263   | 0.023 |
| cg00026239 | chr20:8286497 | PLCB1 | 0.956   | 0.003 |
| cg19579870 | chr20:8287236 | PLCB1 | 0.645   | 0.001 |
| cg11041018 | chr20:8290507 | PLCB1 | 0.216   | 0.008 |
| cg23535804 | chr20:8312668 | PLCB1 | 0.039   | 0.006 |
| cg06033759 | chr20:8315973 | PLCB1 | 0.201   | 0.017 |
| cg05099100 | chr20:8341703 | PLCB1 | 0.151   | 0.024 |
| cg19666328 | chr20:8350135 | PLCB1 | 0.455   | 0.006 |
| cg22384781 | chr20:8368897 | PLCB1 | 0.021   | 0.001 |
| cg21897703 | chr20:8374208 | PLCB1 | 0.609   | 0.015 |
| cg05672540 | chr20:8375030 | PLCB1 | 0.996   | 0.042 |
| cg25731395 | chr20:8386100 | PLCB1 | 0.599   | 0.069 |
| cg18963268 | chr20:8404512 | PLCB1 | 0.985   | 0.002 |
| cg15925374 | chr20:8412846 | PLCB1 | 0.994   | 0.010 |

|            |               |       |       |       |
|------------|---------------|-------|-------|-------|
| cg02415650 | chr20:8424307 | PLCB1 | 0.665 | 0.012 |
| cg15885965 | chr20:8428952 | PLCB1 | 0.110 | 0.002 |
| cg10325053 | chr20:8434698 | PLCB1 | 0.720 | 0.020 |
| cg03104820 | chr20:8435207 | PLCB1 | 0.646 | 0.041 |
| cg18428814 | chr20:8445060 | PLCB1 | 0.372 | 0.021 |
| cg01511124 | chr20:8464652 | PLCB1 | 0.143 | 0.010 |
| cg24237636 | chr20:8481650 | PLCB1 | 0.048 | 0.000 |
| cg08518792 | chr20:8504581 | PLCB1 | 0.142 | 0.011 |
| cg10372668 | chr20:8516552 | PLCB1 | 0.290 | 0.006 |
| cg24477484 | chr20:8564675 | PLCB1 | 0.094 | 0.006 |
| cg22446538 | chr20:8570923 | PLCB1 | 0.064 | 0.019 |
| cg15343777 | chr20:8582553 | PLCB1 | 0.159 | 0.000 |
| cg12188187 | chr20:8583715 | PLCB1 | 0.623 | 0.010 |
| cg08600661 | chr20:8584079 | PLCB1 | 0.482 | 0.001 |
| cg24635752 | chr20:8588663 | PLCB1 | 0.145 | 0.010 |
| cg23459486 | chr20:8589150 | PLCB1 | 0.050 | 0.001 |
| cg13670924 | chr20:8589665 | PLCB1 | 0.185 | 0.002 |
| cg13841889 | chr20:8608448 | PLCB1 | 0.305 | 0.006 |
| cg02970423 | chr20:8608498 | PLCB1 | 0.106 | 0.001 |
| cg21881956 | chr20:8608891 | PLCB1 | 0.419 | 0.004 |
| cg26624712 | chr20:8619946 | PLCB1 | 0.262 | 0.002 |
| cg03698089 | chr20:8626828 | PLCB1 | 0.042 | 0.004 |
| cg10840513 | chr20:8630028 | PLCB1 | 0.107 | 0.006 |
| cg04320983 | chr20:8638302 | PLCB1 | 0.042 | 0.003 |
| cg17847724 | chr20:8638883 | PLCB1 | 0.971 | 0.087 |
| cg04645556 | chr20:8638980 | PLCB1 | 0.850 | 0.095 |
| cg03330328 | chr20:8639212 | PLCB1 | 0.284 | 0.004 |
| cg25659817 | chr20:8639249 | PLCB1 | 0.021 | 0.005 |
| cg19237818 | chr20:8639258 | PLCB1 | 0.055 | 0.008 |
| cg20915818 | chr20:8645472 | PLCB1 | 0.819 | 0.002 |
| cg26359813 | chr20:8695977 | PLCB1 | 0.238 | 0.004 |
| cg07321742 | chr20:8696066 | PLCB1 | 0.032 | 0.027 |
| cg20589039 | chr20:8696415 | PLCB1 | 0.253 | 0.001 |
| cg00404538 | chr20:8702075 | PLCB1 | 0.257 | 0.007 |
| cg06469817 | chr20:8703029 | PLCB1 | 0.515 | 0.001 |
| cg02447937 | chr20:8716243 | PLCB1 | 0.546 | 0.005 |
| cg10068041 | chr20:8721036 | PLCB1 | 0.064 | 0.033 |
| cg03531194 | chr20:8733029 | PLCB1 | 0.909 | 0.003 |
| cg12696295 | chr20:8737895 | PLCB1 | 0.217 | 0.001 |
| cg00995241 | chr20:8739884 | PLCB1 | 0.094 | 0.006 |
| cg07621806 | chr20:8770879 | PLCB1 | 0.489 | 0.010 |
| cg03143830 | chr20:8790045 | PLCB1 | 0.992 | 0.005 |
| cg18291850 | chr20:8793439 | PLCB1 | 0.312 | 0.041 |
| cg06748688 | chr20:8810250 | PLCB1 | 0.538 | 0.004 |
| cg21332848 | chr20:8810501 | PLCB1 | 0.979 | 0.000 |
| cg03181525 | chr20:8825072 | PLCB1 | 0.566 | 0.010 |

|               |               |       |       |       |
|---------------|---------------|-------|-------|-------|
| cg27178677    | chr20:8834803 | PLCB1 | 0.961 | 0.008 |
| cg14067086    | chr20:8861389 | PLCB1 | 0.465 | 0.003 |
| cg04794674    | chr20:9048614 | PLCB4 | 0.742 | 0.005 |
| cg01139925    | chr20:9048845 | PLCB4 | 0.438 | 0.018 |
| cg12895255    | chr20:9049669 | PLCB4 | 0.098 | 0.001 |
| cg06529883    | chr20:9049686 | PLCB4 | 0.128 | 0.001 |
| cg23685416    | chr20:9049689 | PLCB4 | 0.241 | 0.000 |
| cg24231038    | chr20:9049691 | PLCB4 | 0.301 | 0.002 |
| cg27031864    | chr20:9049819 | PLCB4 | 0.010 | 0.004 |
| cg08576827    | chr20:9075493 | PLCB4 | 0.123 | 0.006 |
| cg20484832    | chr20:9075810 | PLCB4 | 0.434 | 0.000 |
| cg03100801    | chr20:9075962 | PLCB4 | 0.208 | 0.000 |
| cg24736099    | chr20:9077730 | PLCB4 | 0.041 | 0.006 |
| cg19492010    | chr20:9100498 | PLCB4 | 0.560 | 0.047 |
| cg24351677    | chr20:9128188 | PLCB4 | 0.719 | 0.011 |
| cg13456056    | chr20:9129940 | PLCB4 | 0.230 | 0.026 |
| cg09143713    | chr20:9141615 | PLCB4 | 0.731 | 0.043 |
| cg03832855    | chr20:9146980 | PLCB4 | 0.815 | 0.004 |
| cg03973404    | chr20:9149533 | PLCB4 | 0.295 | 0.019 |
| cg11758280    | chr20:9153867 | PLCB4 | 0.644 | 0.043 |
| cg16480239    | chr20:9160245 | PLCB4 | 0.096 | 0.040 |
| cg19943221    | chr20:9181020 | PLCB4 | 0.981 | 0.038 |
| cg17742409    | chr20:9181105 | PLCB4 | 0.830 | 0.029 |
| cg23898322    | chr20:9191844 | PLCB4 | 0.063 | 0.027 |
| cg12164029    | chr20:9195836 | PLCB4 | 0.307 | 0.010 |
| cg25279093    | chr20:9196445 | PLCB4 | 0.120 | 0.005 |
| cg15168017    | chr20:9196718 | PLCB4 | 0.024 | 0.014 |
| cg26806367    | chr20:9197593 | PLCB4 | 0.196 | 0.000 |
| cg08886490    | chr20:9197927 | PLCB4 | 0.100 | 0.037 |
| cg03225601    | chr20:9198009 | PLCB4 | 0.162 | 0.014 |
| cg04037197    | chr20:9198061 | PLCB4 | 0.066 | 0.033 |
| cg06899578    | chr20:9198363 | PLCB4 | 0.890 | 0.004 |
| cg13312062    | chr20:9199290 | PLCB4 | 0.997 | 0.008 |
| cg21296708    | chr20:9216201 | PLCB4 | 0.698 | 0.004 |
| cg24823920    | chr20:9287042 | PLCB4 | 0.012 | 0.009 |
| cg25295273    | chr20:9287061 | PLCB4 | 0.575 | 0.008 |
| cg19904783    | chr20:9287445 | PLCB4 | 0.410 | 0.029 |
| cg09222486    | chr20:9288096 | PLCB4 | 0.254 | 0.003 |
| cg25947253    | chr20:9288423 | PLCB4 | 0.011 | 0.006 |
| cg26238857    | chr20:9304477 | PLCB4 | 0.256 | 0.003 |
| cg17781668    | chr20:9334016 | PLCB4 | 0.342 | 0.016 |
| cg22989419    | chr20:9340396 | PLCB4 | 0.356 | 0.003 |
| ch.20.209864F | chr20:9344219 | PLCB4 | 0.075 | 0.005 |
| cg15981619    | chr20:9345648 | PLCB4 | 0.086 | 0.008 |
| cg06642126    | chr20:9374112 | PLCB4 | 0.991 | 0.060 |
| cg10575488    | chr20:9378659 | PLCB4 | 0.762 | 0.010 |

|            |                |       |         |       |
|------------|----------------|-------|---------|-------|
| cg00821851 | chr20:9384559  | PLCB4 | 0.022   | 0.012 |
| cg23939000 | chr20:9389788  | PLCB4 | 0.115   | 0.009 |
| cg08700482 | chr20:9393279  | PLCB4 | 0.386   | 0.002 |
| cg12416274 | chr20:9423494  | PLCB4 | 0.643   | 0.000 |
| cg19238141 | chr20:9441312  | PLCB4 | 0.831   | 0.002 |
| cg16864832 | chr20:9449312  | PLCB4 | 0.724   | 0.001 |
| cg19416290 | chr20:9459569  | PLCB4 | 0.528   | 0.008 |
| cg18870258 | chr20:9460935  | PLCB4 | 0.097   | 0.006 |
| cg12124543 | chr11:48001298 | PTPRJ | 0.587   | 0.028 |
| cg00394658 | chr11:48001669 | PTPRJ | 0.858   | 0.044 |
| cg13646917 | chr11:48001761 | PTPRJ | 0.936   | 0.021 |
| cg19851384 | chr11:48001835 | PTPRJ | 0.058   | 0.000 |
| cg06890484 | chr11:48001940 | PTPRJ | < 0.001 | 0.000 |
| cg02616975 | chr11:48001954 | PTPRJ | < 0.001 | 0.002 |
| cg10457846 | chr11:48002566 | PTPRJ | 0.002   | 0.001 |
| cg06780358 | chr11:48003065 | PTPRJ | 0.188   | 0.001 |
| cg14042131 | chr11:48003169 | PTPRJ | 0.022   | 0.004 |
| cg23026023 | chr11:48005149 | PTPRJ | 0.842   | 0.039 |
| cg17428739 | chr11:48007978 | PTPRJ | 0.726   | 0.005 |
| cg11185765 | chr11:48009578 | PTPRJ | 0.848   | 0.054 |
| cg16357878 | chr11:48009653 | PTPRJ | 0.961   | 0.076 |
| cg16549335 | chr11:48011604 | PTPRJ | 0.010   | 0.000 |
| cg02980360 | chr11:48012728 | PTPRJ | 0.147   | 0.016 |
| cg04222440 | chr11:48012950 | PTPRJ | 0.305   | 0.018 |
| cg08025630 | chr11:48016827 | PTPRJ | 0.193   | 0.006 |
| cg09410691 | chr11:48018661 | PTPRJ | 0.824   | 0.002 |
| cg16027310 | chr11:48019123 | PTPRJ | 0.646   | 0.001 |
| cg11545521 | chr11:48019467 | PTPRJ | 0.166   | 0.015 |
| cg01000627 | chr11:48023430 | PTPRJ | 0.159   | 0.085 |
| cg22111167 | chr11:48026889 | PTPRJ | 0.220   | 0.015 |
| cg15813528 | chr11:48028299 | PTPRJ | 0.004   | 0.066 |
| cg06566905 | chr11:48029442 | PTPRJ | 0.909   | 0.050 |
| cg20563072 | chr11:48030718 | PTPRJ | 0.018   | 0.083 |
| cg00695187 | chr11:48032704 | PTPRJ | 0.006   | 0.037 |
| cg11468953 | chr11:48034953 | PTPRJ | 0.711   | 0.021 |
| cg07401324 | chr11:48036852 | PTPRJ | 0.776   | 0.083 |
| cg19205376 | chr11:48037488 | PTPRJ | 0.949   | 0.070 |
| cg03278516 | chr11:48037855 | PTPRJ | 0.031   | 0.035 |
| cg21620736 | chr11:48037919 | PTPRJ | 0.241   | 0.008 |
| cg19268720 | chr11:48038449 | PTPRJ | 0.818   | 0.015 |
| cg10238692 | chr11:48039247 | PTPRJ | 0.003   | 0.006 |
| cg22976120 | chr11:48040772 | PTPRJ | 0.496   | 0.018 |
| cg19067682 | chr11:48041043 | PTPRJ | 0.788   | 0.025 |
| cg01372366 | chr11:48041783 | PTPRJ | 0.585   | 0.050 |
| cg01519847 | chr11:48042101 | PTPRJ | 0.908   | 0.040 |
| cg00120747 | chr11:48046162 | PTPRJ | 0.883   | 0.002 |

|                |                |       |       |       |
|----------------|----------------|-------|-------|-------|
| cg24404318     | chr11:48053509 | PTPRJ | 0.920 | 0.068 |
| cg15300753     | chr11:48057861 | PTPRJ | 0.058 | 0.002 |
| cg05474665     | chr11:48062997 | PTPRJ | 0.676 | 0.002 |
| cg14802758     | chr11:48063916 | PTPRJ | 0.126 | 0.012 |
| cg08320911     | chr11:48065094 | PTPRJ | 0.707 | 0.029 |
| cg02956479     | chr11:48065711 | PTPRJ | 0.346 | 0.001 |
| cg14997711     | chr11:48065851 | PTPRJ | 0.810 | 0.005 |
| cg23656969     | chr11:48066198 | PTPRJ | 0.003 | 0.023 |
| cg10951214     | chr11:48069893 | PTPRJ | 0.244 | 0.006 |
| cg08383438     | chr11:48071665 | PTPRJ | 0.041 | 0.003 |
| cg02133150     | chr11:48072560 | PTPRJ | 0.386 | 0.011 |
| cg21032823     | chr11:48073477 | PTPRJ | 0.133 | 0.001 |
| cg12057634     | chr11:48073699 | PTPRJ | 0.114 | 0.008 |
| cg26468891     | chr11:48077221 | PTPRJ | 0.002 | 0.019 |
| cg14815299     | chr11:48077914 | PTPRJ | 0.325 | 0.023 |
| cg23646614     | chr11:48083100 | PTPRJ | 0.988 | 0.060 |
| cg26197915     | chr11:48085137 | PTPRJ | 0.922 | 0.054 |
| cg00325914     | chr11:48088520 | PTPRJ | 0.699 | 0.024 |
| cg27008438     | chr11:48094786 | PTPRJ | 0.793 | 0.005 |
| cg22985571     | chr11:48096309 | PTPRJ | 0.002 | 0.043 |
| cg00526281     | chr11:48101308 | PTPRJ | 0.280 | 0.018 |
| cg03808749     | chr11:48102652 | PTPRJ | 0.275 | 0.007 |
| cg02372723     | chr11:48103048 | PTPRJ | 0.999 | 0.079 |
| cg21687008     | chr11:48106202 | PTPRJ | 0.012 | 0.004 |
| cg01456695     | chr11:48108785 | PTPRJ | 0.086 | 0.006 |
| cg07143125     | chr11:48110045 | PTPRJ | 0.931 | 0.056 |
| cg19325637     | chr11:48112253 | PTPRJ | 0.977 | 0.001 |
| cg06298729     | chr11:48118041 | PTPRJ | 0.776 | 0.004 |
| cg24320937     | chr11:48118658 | PTPRJ | 0.278 | 0.003 |
| cg27663642     | chr11:48119692 | PTPRJ | 0.481 | 0.026 |
| cg18477635     | chr11:48122845 | PTPRJ | 0.239 | 0.006 |
| ch.11.1014025R | chr11:48124683 | PTPRJ | 0.898 | 0.010 |
| cg21141258     | chr11:48125522 | PTPRJ | 0.044 | 0.010 |
| cg01106056     | chr11:48126141 | PTPRJ | 0.564 | 0.021 |
| cg18725092     | chr11:48127161 | PTPRJ | 0.004 | 0.014 |
| cg14287039     | chr11:48128164 | PTPRJ | 0.671 | 0.021 |
| cg04515608     | chr11:48129067 | PTPRJ | 0.416 | 0.036 |
| cg09173617     | chr11:48131664 | PTPRJ | 0.147 | 0.001 |
| cg12730832     | chr11:48145766 | PTPRJ | 0.692 | 0.006 |
| cg05165365     | chr11:48151361 | PTPRJ | 0.527 | 0.135 |
| cg20667822     | chr11:48153832 | PTPRJ | 0.072 | 0.022 |
| cg17335440     | chr11:48161380 | PTPRJ | 0.907 | 0.006 |
| cg23547656     | chr11:48161861 | PTPRJ | 0.104 | 0.020 |
| cg07999939     | chr11:48163116 | PTPRJ | 0.093 | 0.006 |
| cg15418976     | chr11:48165989 | PTPRJ | 0.196 | 0.003 |
| cg02063420     | chr11:48166513 | PTPRJ | 0.240 | 0.013 |



|            |                |       |         |       |
|------------|----------------|-------|---------|-------|
| cg07012578 | chr11:48168673 | PTPRJ | 0.395   | 0.011 |
| cg21469197 | chr11:48175868 | PTPRJ | 0.217   | 0.000 |
| cg02299195 | chr11:48185069 | PTPRJ | 0.427   | 0.003 |
| cg05982345 | chr11:48191068 | PTPRJ | 0.257   | 0.007 |
| cg09960747 | chr19:41283407 | RAB4B | 0.122   | 0.000 |
| cg02975986 | chr19:41283506 | RAB4B | 0.023   | 0.002 |
| cg06439809 | chr19:41283578 | RAB4B | 0.810   | 0.001 |
| cg24958765 | chr19:41283667 | RAB4B | 0.269   | 0.001 |
| cg07515241 | chr19:41284000 | RAB4B | 0.142   | 0.003 |
| cg20611850 | chr19:41284006 | RAB4B | 0.055   | 0.008 |
| cg10787145 | chr19:41284032 | RAB4B | 0.033   | 0.000 |
| cg22032540 | chr19:41284057 | RAB4B | 0.247   | 0.001 |
| cg15535636 | chr19:41284070 | RAB4B | 0.090   | 0.002 |
| cg13332130 | chr19:41284234 | RAB4B | < 0.001 | 0.001 |
| cg20951968 | chr19:41284348 | RAB4B | 0.158   | 0.002 |
| cg16853712 | chr19:41286530 | RAB4B | 0.041   | 0.002 |
| cg24062310 | chr19:41289994 | RAB4B | 0.009   | 0.004 |
| cg00831560 | chr19:41290997 | RAB4B | 0.044   | 0.006 |
| cg25621094 | chr19:41292592 | RAB4B | 0.189   | 0.001 |
| cg04671526 | chr19:41292694 | RAB4B | 0.224   | 0.000 |
| cg19873111 | chr19:41294244 | RAB4B | 0.035   | 0.007 |
| cg26741226 | chr19:41295838 | RAB4B | 0.542   | 0.000 |
| cg05301494 | chr19:41302185 | RAB4B | 0.578   | 0.001 |
| cg13355779 | chr20:35806326 | RPN2  | 0.089   | 0.029 |
| cg16553051 | chr20:35806496 | RPN2  | 0.038   | 0.020 |
| cg15627502 | chr20:35806795 | RPN2  | 0.134   | 0.002 |
| cg12895429 | chr20:35806810 | RPN2  | 0.446   | 0.003 |
| cg10873891 | chr20:35806913 | RPN2  | 0.997   | 0.004 |
| cg02930037 | chr20:35807377 | RPN2  | 0.048   | 0.001 |
| cg16176383 | chr20:35807410 | RPN2  | 0.382   | 0.000 |
| cg05533115 | chr20:35807416 | RPN2  | 0.071   | 0.001 |
| cg08120289 | chr20:35807421 | RPN2  | 0.204   | 0.000 |
| cg13946860 | chr20:35807510 | RPN2  | 0.001   | 0.001 |
| cg16623656 | chr20:35807575 | RPN2  | 0.001   | 0.009 |
| cg13173903 | chr20:35807784 | RPN2  | 0.011   | 0.001 |
| cg20079898 | chr20:35807905 | RPN2  | 0.031   | 0.004 |
| cg01140293 | chr20:35807911 | RPN2  | 0.007   | 0.006 |
| cg15389461 | chr20:35818328 | RPN2  | 0.114   | 0.007 |
| cg18016202 | chr20:35824027 | RPN2  | 0.348   | 0.004 |
| cg24469719 | chr20:35833182 | RPN2  | 0.409   | 0.001 |
| cg18549386 | chr20:35833196 | RPN2  | 0.078   | 0.004 |
| cg06889272 | chr20:35833202 | RPN2  | 0.117   | 0.007 |
| cg16831894 | chr20:35833240 | RPN2  | 0.145   | 0.002 |
| cg08531864 | chr20:35841852 | RPN2  | 0.068   | 0.019 |
| cg16605933 | chr20:35842190 | RPN2  | 0.081   | 0.009 |
| cg19233297 | chr20:35851412 | RPN2  | 0.639   | 0.001 |

|            |                |         |       |       |
|------------|----------------|---------|-------|-------|
| cg19632636 | chr20:35856276 | RPN2    | 0.072 | 0.005 |
| cg20067831 | chr20:35856858 | RPN2    | 0.314 | 0.002 |
| cg05623559 | chr20:35857024 | RPN2    | 0.473 | 0.012 |
| cg02058787 | chr20:35857341 | RPN2    | 0.436 | 0.004 |
| cg24308162 | chr20:35862530 | RPN2    | 0.782 | 0.013 |
| cg24377945 | chr20:35867528 | RPN2    | 0.441 | 0.009 |
| cg09890930 | chr12:56149396 | SARNP   | 0.052 | 0.004 |
| cg05511733 | chr12:56151190 | SARNP   | 0.727 | 0.003 |
| cg10101707 | chr12:56154315 | SARNP   | 0.113 | 0.022 |
| cg10267968 | chr12:56155142 | SARNP   | 0.046 | 0.017 |
| cg14182058 | chr12:56156904 | SARNP   | 0.764 | 0.001 |
| cg25366834 | chr12:56157878 | SARNP   | 0.842 | 0.004 |
| cg12292972 | chr12:56158737 | SARNP   | 0.140 | 0.005 |
| cg23689080 | chr12:56159704 | SARNP   | 0.039 | 0.002 |
| cg13458087 | chr12:56165672 | SARNP   | 0.808 | 0.007 |
| cg03694302 | chr12:56191228 | SARNP   | 0.847 | 0.013 |
| cg15945863 | chr12:56191502 | SARNP   | 0.349 | 0.002 |
| cg12799537 | chr12:56207909 | SARNP   | 0.150 | 0.001 |
| cg23184344 | chr12:56211634 | SARNP   | 0.501 | 0.000 |
| cg16660717 | chr12:56211781 | SARNP   | 0.730 | 0.000 |
| cg05584675 | chr12:56211824 | SARNP   | 0.095 | 0.001 |
| cg18710288 | chr12:56211992 | SARNP   | 0.382 | 0.001 |
| cg21995174 | chr12:56212070 | SARNP   | 0.816 | 0.016 |
| cg06990019 | chr12:56212084 | SARNP   | 0.748 | 0.003 |
| cg08799692 | chr12:56212243 | SARNP   | 0.069 | 0.000 |
| cg22225546 | chr12:56212269 | SARNP   | 0.034 | 0.004 |
| cg03744975 | chr12:56212418 | SARNP   | 0.210 | 0.012 |
| cg06904727 | chr12:56212550 | SARNP   | 0.042 | 0.039 |
| cg08214038 | chr22:24666470 | SPECC1L | 0.003 | 0.003 |
| cg10973068 | chr22:24666818 | SPECC1L | 0.036 | 0.012 |
| cg11978118 | chr22:24669106 | SPECC1L | 0.251 | 0.060 |
| cg19921814 | chr22:24670119 | SPECC1L | 0.192 | 0.027 |
| cg22466032 | chr22:24681310 | SPECC1L | 0.811 | 0.052 |
| cg21636253 | chr22:24685775 | SPECC1L | 0.023 | 0.035 |
| cg24173387 | chr22:24688117 | SPECC1L | 0.977 | 0.006 |
| cg15942313 | chr22:24737278 | SPECC1L | 0.366 | 0.002 |
| cg04248621 | chr22:24737382 | SPECC1L | 0.077 | 0.021 |
| cg00127028 | chr22:24737496 | SPECC1L | 0.105 | 0.001 |
| cg10763737 | chr22:24737582 | SPECC1L | 0.119 | 0.002 |
| cg13752382 | chr22:24737646 | SPECC1L | 0.841 | 0.000 |
| cg20412029 | chr22:24737906 | SPECC1L | 0.234 | 0.001 |
| cg12521217 | chr22:24737946 | SPECC1L | 0.003 | 0.003 |
| cg25580335 | chr22:24738240 | SPECC1L | 0.765 | 0.025 |
| cg15548624 | chr22:24755907 | SPECC1L | 0.994 | 0.000 |
| cg16230918 | chr22:24759060 | SPECC1L | 0.062 | 0.003 |
| cg26353903 | chr5:134784604 | TIFAB   | 0.599 | 0.007 |

|            |                |       |       |       |
|------------|----------------|-------|-------|-------|
| cg12481536 | chr5:134784606 | TIFAB | 0.455 | 0.006 |
| cg16339915 | chr5:134785391 | TIFAB | 0.019 | 0.006 |
| cg02122200 | chr5:134785604 | TIFAB | 0.293 | 0.008 |
| cg09288778 | chr5:134786107 | TIFAB | 0.410 | 0.030 |
| cg12738534 | chr5:134786112 | TIFAB | 0.096 | 0.039 |
| cg16750772 | chr5:134786269 | TIFAB | 0.003 | 0.038 |
| cg09875213 | chr5:134786596 | TIFAB | 0.081 | 0.031 |
| cg16176675 | chr5:134786942 | TIFAB | 0.473 | 0.028 |
| cg03541914 | chr5:134787465 | TIFAB | 0.100 | 0.009 |
| cg22979041 | chr5:134787907 | TIFAB | 0.922 | 0.012 |
| cg03510194 | chr5:134788007 | TIFAB | 0.834 | 0.039 |
| cg18957078 | chr5:134788128 | TIFAB | 0.449 | 0.027 |
| cg00766507 | chr5:134788607 | TIFAB | 0.133 | 0.005 |
| cg13691824 | chr5:134788649 | TIFAB | 0.034 | 0.020 |
| cg06324419 | chr5:134788694 | TIFAB | 0.400 | 0.001 |
| cg19949797 | chr5:134789115 | TIFAB | 0.804 | 0.002 |
| cg01288904 | chr8:80947440  | TPD52 | 0.189 | 0.003 |
| cg23408678 | chr8:80955164  | TPD52 | 0.885 | 0.005 |
| cg00370891 | chr8:80960387  | TPD52 | 0.121 | 0.002 |
| cg06350472 | chr8:80963803  | TPD52 | 0.414 | 0.008 |
| cg19935724 | chr8:80964035  | TPD52 | 0.790 | 0.004 |
| cg07930159 | chr8:80964882  | TPD52 | 0.702 | 0.027 |
| cg19925215 | chr8:80964918  | TPD52 | 0.442 | 0.038 |
| cg22887915 | chr8:80965595  | TPD52 | 0.516 | 0.003 |
| cg07132557 | chr8:80967149  | TPD52 | 0.522 | 0.050 |
| cg26384678 | chr8:80977008  | TPD52 | 0.318 | 0.022 |
| cg22692608 | chr8:80978343  | TPD52 | 0.773 | 0.031 |
| cg05084750 | chr8:80979548  | TPD52 | 0.279 | 0.005 |
| cg18676805 | chr8:80990403  | TPD52 | 0.556 | 0.004 |
| cg06634867 | chr8:80990459  | TPD52 | 0.386 | 0.003 |
| cg02549588 | chr8:80992699  | TPD52 | 0.887 | 0.001 |
| cg16773115 | chr8:80992750  | TPD52 | 0.600 | 0.001 |
| cg07892425 | chr8:80992982  | TPD52 | 0.101 | 0.013 |
| cg17540250 | chr8:80993543  | TPD52 | 0.998 | 0.011 |
| cg13155823 | chr8:80993721  | TPD52 | 0.794 | 0.012 |
| cg26428748 | chr8:80993726  | TPD52 | 0.080 | 0.019 |
| cg14507357 | chr8:80994056  | TPD52 | 0.230 | 0.008 |
| cg04963948 | chr8:80997426  | TPD52 | 0.008 | 0.004 |
| cg27415032 | chr8:80997524  | TPD52 | 0.463 | 0.007 |
| cg04068975 | chr8:81001528  | TPD52 | 0.336 | 0.015 |
| cg15628415 | chr8:81003747  | TPD52 | 0.026 | 0.003 |
| cg15183852 | chr8:81009091  | TPD52 | 0.036 | 0.024 |
| cg11138606 | chr8:81013230  | TPD52 | 0.177 | 0.002 |
| cg21595409 | chr8:81014522  | TPD52 | 0.214 | 0.012 |
| cg09737525 | chr8:81014736  | TPD52 | 0.348 | 0.046 |
| cg10933148 | chr8:81015199  | TPD52 | 0.437 | 0.005 |

|            |                |        |         |       |
|------------|----------------|--------|---------|-------|
| cg11669824 | chr8:81020215  | TPD52  | 0.524   | 0.006 |
| cg03817394 | chr8:81033597  | TPD52  | 0.368   | 0.005 |
| cg16976808 | chr8:81033743  | TPD52  | 0.158   | 0.012 |
| cg13009608 | chr8:81034420  | TPD52  | 0.025   | 0.001 |
| cg01490091 | chr8:81035207  | TPD52  | 0.057   | 0.010 |
| cg04714581 | chr8:81047040  | TPD52  | 0.988   | 0.078 |
| cg14075772 | chr8:81049968  | TPD52  | 0.571   | 0.004 |
| cg14587889 | chr8:81051024  | TPD52  | 0.418   | 0.033 |
| cg04384543 | chr8:81053048  | TPD52  | 0.498   | 0.016 |
| cg20615753 | chr8:81053284  | TPD52  | 0.398   | 0.033 |
| cg21582824 | chr8:81054395  | TPD52  | 0.951   | 0.021 |
| cg16846740 | chr8:81055067  | TPD52  | 0.413   | 0.006 |
| cg03193834 | chr8:81057597  | TPD52  | 0.791   | 0.003 |
| cg04112878 | chr8:81059932  | TPD52  | 0.160   | 0.007 |
| cg22904437 | chr8:81064304  | TPD52  | 0.359   | 0.027 |
| cg12951110 | chr8:81065540  | TPD52  | 0.338   | 0.034 |
| cg11217679 | chr8:81070832  | TPD52  | 0.739   | 0.015 |
| cg23342367 | chr8:81077480  | TPD52  | 0.756   | 0.099 |
| cg09540738 | chr8:81080281  | TPD52  | 0.615   | 0.083 |
| cg21250232 | chr8:81082895  | TPD52  | 0.117   | 0.006 |
| cg23295127 | chr8:81083339  | TPD52  | 0.025   | 0.003 |
| cg07587588 | chr8:81083356  | TPD52  | 0.125   | 0.006 |
| cg16008931 | chr8:81083431  | TPD52  | 0.165   | 0.008 |
| cg16638571 | chr8:81083534  | TPD52  | < 0.001 | 0.002 |
| cg01341301 | chr8:81083577  | TPD52  | 0.001   | 0.001 |
| cg04341084 | chr8:81083671  | TPD52  | 0.001   | 0.001 |
| cg22273042 | chr8:81083829  | TPD52  | 0.026   | 0.006 |
| cg02399584 | chr8:81083852  | TPD52  | 0.007   | 0.001 |
| cg19420321 | chr8:81084048  | TPD52  | 0.040   | 0.016 |
| cg18459342 | chr8:81084056  | TPD52  | 0.094   | 0.017 |
| cg09619309 | chr8:81084440  | TPD52  | 0.535   | 0.002 |
| cg16391871 | chr8:81084488  | TPD52  | 0.149   | 0.002 |
| cg12332167 | chr8:81084554  | TPD52  | 0.008   | 0.004 |
| cg16496585 | chr8:81084705  | TPD52  | 0.026   | 0.006 |
| cg19319780 | chr8:81084882  | TPD52  | 0.032   | 0.002 |
| cg24729352 | chr13:19747959 | TUBA3C | 0.754   | 0.006 |
| cg24828246 | chr13:19749816 | TUBA3C | 0.599   | 0.003 |
| cg19925741 | chr13:19751465 | TUBA3C | 0.271   | 0.005 |
| cg08756887 | chr13:19754434 | TUBA3C | 0.878   | 0.001 |
| cg10802118 | chr13:19754926 | TUBA3C | 0.780   | 0.003 |
| cg11511819 | chr13:19755670 | TUBA3C | 0.487   | 0.002 |
| cg22675150 | chr13:19755900 | TUBA3C | 0.070   | 0.012 |
| cg04131456 | chr13:19755916 | TUBA3C | 0.796   | 0.001 |
| cg06437862 | chr13:19756096 | TUBA3C | 0.876   | 0.008 |
| cg05006718 | chr13:19756122 | TUBA3C | 0.837   | 0.007 |
| cg15615022 | chr13:19756254 | TUBA3C | 0.685   | 0.022 |

|            |                |        |       |       |
|------------|----------------|--------|-------|-------|
| cg22274414 | chr13:19756318 | TUBA3C | 0.964 | 0.009 |
| cg14392476 | chr13:19756329 | TUBA3C | 0.305 | 0.007 |
| cg04269057 | chr10:72971005 | UNC5B  | 0.798 | 0.005 |
| cg16786583 | chr10:72971759 | UNC5B  | 0.641 | 0.010 |
| cg07477077 | chr10:72971873 | UNC5B  | 0.521 | 0.019 |
| cg05871136 | chr10:72971961 | UNC5B  | 0.275 | 0.014 |
| cg08342721 | chr10:72972076 | UNC5B  | 0.005 | 0.001 |
| cg15929693 | chr10:72972132 | UNC5B  | 0.176 | 0.000 |
| cg09470230 | chr10:72972137 | UNC5B  | 0.030 | 0.000 |
| cg20254483 | chr10:72972204 | UNC5B  | 0.353 | 0.000 |
| cg26450586 | chr10:72972207 | UNC5B  | 0.038 | 0.000 |
| cg18858343 | chr10:72972901 | UNC5B  | 0.001 | 0.000 |
| cg14042687 | chr10:72973260 | UNC5B  | 0.099 | 0.001 |
| cg08905239 | chr10:72973765 | UNC5B  | 0.883 | 0.028 |
| cg04177244 | chr10:72973894 | UNC5B  | 0.945 | 0.000 |
| cg07462866 | chr10:72974629 | UNC5B  | 0.043 | 0.014 |
| cg25343399 | chr10:72974694 | UNC5B  | 0.058 | 0.002 |
| cg12873350 | chr10:72976676 | UNC5B  | 0.276 | 0.019 |
| cg18579564 | chr10:72977378 | UNC5B  | 0.058 | 0.006 |
| cg23967873 | chr10:72977537 | UNC5B  | 0.055 | 0.011 |
| cg14957186 | chr10:72977773 | UNC5B  | 0.234 | 0.002 |
| cg18389931 | chr10:72978724 | UNC5B  | 0.034 | 0.014 |
| cg24591279 | chr10:72982627 | UNC5B  | 0.010 | 0.002 |
| cg26328326 | chr10:72983319 | UNC5B  | 0.280 | 0.016 |
| cg10319211 | chr10:72983571 | UNC5B  | 0.129 | 0.007 |
| cg22238397 | chr10:72989211 | UNC5B  | 0.338 | 0.012 |
| cg11390659 | chr10:72990169 | UNC5B  | 0.011 | 0.050 |
| cg17220314 | chr10:72992083 | UNC5B  | 0.034 | 0.031 |
| cg04478997 | chr10:72992359 | UNC5B  | 0.065 | 0.013 |
| cg19673155 | chr10:72995181 | UNC5B  | 0.541 | 0.020 |
| cg12481560 | chr10:72997126 | UNC5B  | 0.550 | 0.016 |
| cg08206047 | chr10:72997755 | UNC5B  | 0.409 | 0.001 |
| cg27135218 | chr10:73000505 | UNC5B  | 0.931 | 0.039 |
| cg10893388 | chr10:73001413 | UNC5B  | 0.481 | 0.020 |
| cg13185473 | chr10:73003572 | UNC5B  | 0.006 | 0.022 |
| cg09539094 | chr10:73003617 | UNC5B  | 0.282 | 0.001 |
| cg26152017 | chr10:73004558 | UNC5B  | 0.749 | 0.031 |
| cg24839386 | chr10:73004576 | UNC5B  | 0.792 | 0.029 |
| cg08913389 | chr10:73005575 | UNC5B  | 0.038 | 0.012 |
| cg11201708 | chr10:73010487 | UNC5B  | 0.868 | 0.099 |
| cg19343212 | chr10:73012347 | UNC5B  | 0.276 | 0.015 |
| cg02440719 | chr10:73013749 | UNC5B  | 0.008 | 0.010 |
| cg21732487 | chr10:73013792 | UNC5B  | 0.097 | 0.008 |
| cg13094293 | chr10:73013827 | UNC5B  | 0.052 | 0.003 |
| cg04904026 | chr10:73015078 | UNC5B  | 0.720 | 0.007 |
| cg17668756 | chr10:73020218 | UNC5B  | 0.053 | 0.007 |

|                |                |       |         |       |
|----------------|----------------|-------|---------|-------|
| cg16759416     | chr10:73022276 | UNC5B | 0.782   | 0.000 |
| cg22567444     | chr10:73023373 | UNC5B | 0.932   | 0.002 |
| cg02378006     | chr10:73026288 | UNC5B | 0.373   | 0.014 |
| cg09903766     | chr10:73027051 | UNC5B | 0.216   | 0.013 |
| cg27413180     | chr10:73028540 | UNC5B | 0.010   | 0.017 |
| cg20194733     | chr10:73033477 | UNC5B | 0.100   | 0.012 |
| cg19808533     | chr10:73035408 | UNC5B | 0.552   | 0.012 |
| cg02978938     | chr10:73036974 | UNC5B | 0.129   | 0.003 |
| cg17477835     | chr10:73038012 | UNC5B | 0.015   | 0.033 |
| cg18317005     | chr10:73039285 | UNC5B | 0.890   | 0.019 |
| ch.10.1515233F | chr10:73039321 | UNC5B | 0.191   | 0.002 |
| cg16180595     | chr10:73040496 | UNC5B | 0.019   | 0.006 |
| cg13618472     | chr10:73042210 | UNC5B | 0.067   | 0.008 |
| cg16301256     | chr10:73045356 | UNC5B | 0.044   | 0.011 |
| cg17551083     | chr10:73048291 | UNC5B | 0.277   | 0.004 |
| cg13824565     | chr10:73048387 | UNC5B | 0.740   | 0.008 |
| cg08814830     | chr10:73049277 | UNC5B | 0.083   | 0.003 |
| cg16817550     | chr10:73051053 | UNC5B | 0.005   | 0.006 |
| cg25514423     | chr10:73052493 | UNC5B | 0.616   | 0.003 |
| cg23622162     | chr10:73059249 | UNC5B | 0.942   | 0.041 |
| cg17132554     | chr10:73061004 | UNC5B | 0.906   | 0.003 |
| cg05227773     | chr16:72817808 | ZFH3  | 0.081   | 0.012 |
| cg03045067     | chr16:72819254 | ZFH3  | 0.525   | 0.005 |
| cg09761690     | chr16:72820681 | ZFH3  | 0.324   | 0.004 |
| cg05543909     | chr16:72820921 | ZFH3  | 0.805   | 0.002 |
| cg08961664     | chr16:72821141 | ZFH3  | 0.832   | 0.004 |
| cg02246055     | chr16:72821353 | ZFH3  | 0.015   | 0.001 |
| cg08512490     | chr16:72821498 | ZFH3  | < 0.001 | 0.002 |
| cg16630989     | chr16:72821566 | ZFH3  | 0.049   | 0.003 |
| cg04814450     | chr16:72821665 | ZFH3  | 0.031   | 0.001 |
| cg01229752     | chr16:72822033 | ZFH3  | 0.900   | 0.000 |
| cg19594635     | chr16:72822362 | ZFH3  | 0.976   | 0.053 |
| cg07667790     | chr16:72823692 | ZFH3  | 0.519   | 0.000 |
| cg00075615     | chr16:72827803 | ZFH3  | 0.155   | 0.001 |
| cg03382246     | chr16:72827884 | ZFH3  | 0.089   | 0.009 |
| cg04994202     | chr16:72828024 | ZFH3  | 0.362   | 0.004 |
| cg08452002     | chr16:72829368 | ZFH3  | 0.030   | 0.002 |
| cg03224276     | chr16:72829831 | ZFH3  | 0.189   | 0.002 |
| cg16372869     | chr16:72829901 | ZFH3  | 0.099   | 0.001 |
| cg07005580     | chr16:72830034 | ZFH3  | 0.170   | 0.000 |
| cg02372821     | chr16:72830233 | ZFH3  | 0.971   | 0.005 |
| cg04101363     | chr16:72830284 | ZFH3  | 0.730   | 0.002 |
| cg18315961     | chr16:72839653 | ZFH3  | 0.117   | 0.005 |
| cg03752425     | chr16:72840504 | ZFH3  | 0.437   | 0.000 |
| cg12993369     | chr16:72840594 | ZFH3  | 0.589   | 0.002 |
| cg01312273     | chr16:72852527 | ZFH3  | 0.071   | 0.024 |

|            |                |      |       |       |
|------------|----------------|------|-------|-------|
| cg20053399 | chr16:72853514 | ZFH3 | 0.333 | 0.011 |
| cg27273821 | chr16:72854773 | ZFH3 | 0.522 | 0.003 |
| cg22253600 | chr16:72856057 | ZFH3 | 0.316 | 0.010 |
| cg23410343 | chr16:72856353 | ZFH3 | 0.285 | 0.003 |
| cg14881826 | chr16:72856936 | ZFH3 | 0.316 | 0.003 |
| cg07696190 | chr16:72857124 | ZFH3 | 0.737 | 0.008 |
| cg08963581 | chr16:72863301 | ZFH3 | 0.150 | 0.016 |
| cg07457984 | chr16:72867265 | ZFH3 | 0.397 | 0.005 |
| cg08508319 | chr16:72870964 | ZFH3 | 0.871 | 0.007 |
| cg20915517 | chr16:72871902 | ZFH3 | 0.273 | 0.002 |
| cg00908120 | chr16:72872925 | ZFH3 | 0.292 | 0.001 |
| cg03379631 | chr16:72873149 | ZFH3 | 0.588 | 0.002 |
| cg25038295 | chr16:72874571 | ZFH3 | 0.588 | 0.015 |
| cg05946791 | chr16:72878556 | ZFH3 | 0.023 | 0.003 |
| cg05969150 | chr16:72882495 | ZFH3 | 0.094 | 0.022 |
| cg27182230 | chr16:72882824 | ZFH3 | 0.602 | 0.025 |
| cg11615523 | chr16:72883588 | ZFH3 | 0.283 | 0.002 |
| cg16397028 | chr16:72884581 | ZFH3 | 0.255 | 0.013 |
| cg24651536 | chr16:72888448 | ZFH3 | 0.311 | 0.041 |
| cg05723075 | chr16:72890498 | ZFH3 | 0.516 | 0.009 |
| cg10472320 | chr16:72892765 | ZFH3 | 0.311 | 0.004 |
| cg09223396 | chr16:72893924 | ZFH3 | 0.430 | 0.000 |
| cg07213145 | chr16:72893945 | ZFH3 | 0.234 | 0.003 |
| cg06301789 | chr16:72901431 | ZFH3 | 0.850 | 0.004 |
| cg08968069 | chr16:72903003 | ZFH3 | 0.523 | 0.009 |
| cg00390483 | chr16:72907786 | ZFH3 | 0.243 | 0.003 |
| cg20539444 | chr16:72909135 | ZFH3 | 0.047 | 0.012 |
| cg21815992 | chr16:72910199 | ZFH3 | 0.847 | 0.039 |
| cg15959611 | chr16:72911371 | ZFH3 | 0.711 | 0.021 |
| cg09293559 | chr16:72911729 | ZFH3 | 0.910 | 0.004 |
| cg08939976 | chr16:72912494 | ZFH3 | 0.974 | 0.065 |
| cg08858926 | chr16:72918832 | ZFH3 | 0.526 | 0.020 |
| cg24058010 | chr16:72923910 | ZFH3 | 0.314 | 0.007 |
| cg26731575 | chr16:72929007 | ZFH3 | 0.030 | 0.003 |
| cg01779559 | chr16:72930084 | ZFH3 | 0.097 | 0.002 |
| cg09681300 | chr16:72930200 | ZFH3 | 0.563 | 0.002 |
| cg05568868 | chr16:72930479 | ZFH3 | 0.947 | 0.001 |
| cg14312104 | chr16:72938620 | ZFH3 | 0.201 | 0.003 |
| cg18636647 | chr16:72939842 | ZFH3 | 0.153 | 0.016 |
| cg24301278 | chr16:72942625 | ZFH3 | 0.155 | 0.015 |
| cg08645153 | chr16:72942661 | ZFH3 | 0.877 | 0.006 |
| cg07203886 | chr16:72945431 | ZFH3 | 0.149 | 0.003 |
| cg12190404 | chr16:72948114 | ZFH3 | 0.863 | 0.000 |
| cg03888640 | chr16:72955161 | ZFH3 | 0.053 | 0.018 |
| cg10104480 | chr16:72955250 | ZFH3 | 0.064 | 0.010 |
| cg05918327 | chr16:72955295 | ZFH3 | 0.125 | 0.010 |

|            |                |      |         |       |
|------------|----------------|------|---------|-------|
| cg10775849 | chr16:72957911 | ZFH3 | 0.159   | 0.002 |
| cg09837951 | chr16:72958530 | ZFH3 | 0.159   | 0.001 |
| cg23625230 | chr16:72958938 | ZFH3 | 0.175   | 0.022 |
| cg03138635 | chr16:72960528 | ZFH3 | 0.104   | 0.008 |
| cg07434438 | chr16:72961899 | ZFH3 | 0.505   | 0.024 |
| cg26465289 | chr16:72963399 | ZFH3 | 0.072   | 0.002 |
| cg08709228 | chr16:72965762 | ZFH3 | 0.986   | 0.020 |
| cg15099137 | chr16:72966213 | ZFH3 | 0.954   | 0.000 |
| cg02605232 | chr16:72967269 | ZFH3 | 0.231   | 0.005 |
| cg27231624 | chr16:72967626 | ZFH3 | 0.719   | 0.049 |
| cg27623978 | chr16:72968803 | ZFH3 | 0.764   | 0.038 |
| cg15600244 | chr16:72970175 | ZFH3 | 0.113   | 0.003 |
| cg10246450 | chr16:72970503 | ZFH3 | 0.352   | 0.012 |
| cg05972185 | chr16:72972644 | ZFH3 | 0.071   | 0.020 |
| cg17088908 | chr16:72972932 | ZFH3 | 0.867   | 0.076 |
| cg26909217 | chr16:72974588 | ZFH3 | 0.556   | 0.036 |
| cg13744691 | chr16:72976215 | ZFH3 | 0.125   | 0.006 |
| cg04211829 | chr16:72981203 | ZFH3 | 0.005   | 0.013 |
| cg04052706 | chr16:72981543 | ZFH3 | 0.684   | 0.008 |
| cg26644885 | chr16:72981599 | ZFH3 | < 0.001 | 0.010 |
| cg09858224 | chr16:72981996 | ZFH3 | 0.719   | 0.002 |
| cg04667640 | chr16:72982116 | ZFH3 | 0.469   | 0.003 |
| cg08692430 | chr16:72982398 | ZFH3 | 0.450   | 0.010 |
| cg10298059 | chr16:72982446 | ZFH3 | 0.383   | 0.017 |
| cg07051796 | chr16:72982538 | ZFH3 | 0.014   | 0.001 |
| cg01678913 | chr16:72984472 | ZFH3 | 0.045   | 0.004 |
| cg16651606 | chr16:72984650 | ZFH3 | 0.832   | 0.002 |
| cg05364570 | chr16:72984764 | ZFH3 | 0.335   | 0.004 |
| cg23661268 | chr16:72987028 | ZFH3 | 0.241   | 0.035 |
| cg06185532 | chr16:72987360 | ZFH3 | 0.034   | 0.008 |
| cg11136145 | chr16:72988399 | ZFH3 | 0.033   | 0.034 |
| cg13179077 | chr16:72990563 | ZFH3 | 0.564   | 0.004 |
| cg02736186 | chr16:72990977 | ZFH3 | 0.269   | 0.013 |
| cg05764102 | chr16:72991344 | ZFH3 | 0.532   | 0.002 |
| cg26573797 | chr16:72991926 | ZFH3 | 0.414   | 0.000 |
| cg08080174 | chr16:72992580 | ZFH3 | 0.381   | 0.009 |
| cg18527588 | chr16:72993161 | ZFH3 | 0.877   | 0.003 |
| cg05704496 | chr16:72993237 | ZFH3 | 0.116   | 0.025 |
| cg05366475 | chr16:72993541 | ZFH3 | 0.019   | 0.001 |
| cg14462566 | chr16:72993790 | ZFH3 | 0.508   | 0.004 |
| cg08813197 | chr16:72993866 | ZFH3 | 0.199   | 0.003 |
| cg06381966 | chr16:72994598 | ZFH3 | 0.750   | 0.002 |
| cg16563255 | chr16:72995177 | ZFH3 | 0.667   | 0.007 |
| cg14707682 | chr16:73002013 | ZFH3 | 0.546   | 0.000 |
| cg02969609 | chr16:73003832 | ZFH3 | 0.296   | 0.002 |
| cg20069798 | chr16:73010721 | ZFH3 | 0.363   | 0.003 |



|            |                |       |       |       |
|------------|----------------|-------|-------|-------|
| cg23274883 | chr16:73010808 | ZFHX3 | 0.768 | 0.010 |
| cg23987077 | chr16:73012207 | ZFHX3 | 0.516 | 0.008 |
| cg16057662 | chr16:73017823 | ZFHX3 | 0.461 | 0.010 |
| cg02284258 | chr16:73017982 | ZFHX3 | 0.081 | 0.018 |
| cg12703081 | chr16:73018646 | ZFHX3 | 0.540 | 0.007 |
| cg19693972 | chr16:73018672 | ZFHX3 | 0.082 | 0.027 |
| cg10298741 | chr16:73019173 | ZFHX3 | 0.060 | 0.024 |
| cg22070783 | chr16:73022010 | ZFHX3 | 0.041 | 0.005 |
| cg08094551 | chr16:73023727 | ZFHX3 | 0.452 | 0.005 |
| cg17555914 | chr16:73023997 | ZFHX3 | 0.619 | 0.011 |
| cg15938946 | chr16:73024202 | ZFHX3 | 0.836 | 0.049 |
| cg08170679 | chr16:73025828 | ZFHX3 | 0.104 | 0.013 |
| cg24805342 | chr16:73029229 | ZFHX3 | 0.828 | 0.005 |
| cg06649004 | chr16:73029234 | ZFHX3 | 0.290 | 0.009 |
| cg03901393 | chr16:73029288 | ZFHX3 | 0.889 | 0.051 |
| cg10932166 | chr16:73031218 | ZFHX3 | 0.986 | 0.070 |
| cg16829616 | chr16:73035242 | ZFHX3 | 0.549 | 0.009 |
| cg03808233 | chr16:73035287 | ZFHX3 | 0.597 | 0.006 |
| cg26091825 | chr16:73044002 | ZFHX3 | 0.188 | 0.002 |
| cg13752020 | chr16:73046138 | ZFHX3 | 0.265 | 0.003 |
| cg22460989 | chr16:73049971 | ZFHX3 | 0.696 | 0.001 |
| cg16959721 | chr16:73053290 | ZFHX3 | 0.424 | 0.011 |
| cg10415570 | chr16:73053779 | ZFHX3 | 0.479 | 0.004 |
| cg05639334 | chr16:73056524 | ZFHX3 | 0.741 | 0.016 |
| cg23130717 | chr16:73057684 | ZFHX3 | 0.597 | 0.011 |
| cg09618520 | chr16:73057948 | ZFHX3 | 0.190 | 0.002 |
| cg17492658 | chr16:73058311 | ZFHX3 | 0.037 | 0.003 |
| cg03339247 | chr16:73059888 | ZFHX3 | 0.160 | 0.001 |
| cg27262054 | chr16:73067525 | ZFHX3 | 0.528 | 0.004 |
| cg02013904 | chr16:73067772 | ZFHX3 | 0.292 | 0.006 |
| cg13121670 | chr16:73069878 | ZFHX3 | 0.313 | 0.008 |
| cg06477050 | chr16:73071300 | ZFHX3 | 0.331 | 0.002 |
| cg17877577 | chr16:73071822 | ZFHX3 | 0.001 | 0.002 |
| cg09392505 | chr16:73072333 | ZFHX3 | 0.932 | 0.025 |
| cg27364780 | chr16:73074423 | ZFHX3 | 0.027 | 0.001 |
| cg03943249 | chr16:73076266 | ZFHX3 | 0.003 | 0.002 |
| cg03805182 | chr16:73078071 | ZFHX3 | 0.116 | 0.011 |
| cg10483525 | chr16:73080909 | ZFHX3 | 0.372 | 0.015 |
| cg03878654 | chr16:73081124 | ZFHX3 | 0.086 | 0.011 |
| cg03214730 | chr16:73081558 | ZFHX3 | 0.803 | 0.013 |
| cg09306186 | chr16:73081722 | ZFHX3 | 0.281 | 0.005 |
| cg03490839 | chr16:73082051 | ZFHX3 | 0.004 | 0.001 |
| cg20631181 | chr16:73082402 | ZFHX3 | 0.299 | 0.002 |
| cg05556210 | chr16:73082405 | ZFHX3 | 0.992 | 0.006 |
| cg14912709 | chr16:73082434 | ZFHX3 | 0.011 | 0.000 |
| cg08767708 | chr16:73082503 | ZFHX3 | 0.331 | 0.006 |

|            |                |      |         |       |
|------------|----------------|------|---------|-------|
| cg07427605 | chr16:73082535 | ZFH3 | 0.828   | 0.005 |
| cg04910662 | chr16:73083014 | ZFH3 | 0.092   | 0.004 |
| cg01743592 | chr16:73083278 | ZFH3 | 0.154   | 0.002 |
| cg07294323 | chr16:73083327 | ZFH3 | 0.039   | 0.010 |
| cg09754243 | chr16:73083863 | ZFH3 | 0.025   | 0.001 |
| cg05516390 | chr16:73088677 | ZFH3 | 0.339   | 0.005 |
| cg25152254 | chr16:73090085 | ZFH3 | 0.790   | 0.047 |
| cg10092685 | chr16:73090591 | ZFH3 | 0.089   | 0.009 |
| cg06086177 | chr16:73090646 | ZFH3 | 0.080   | 0.003 |
| cg04700292 | chr16:73090723 | ZFH3 | 0.692   | 0.011 |
| cg05915866 | chr16:73090838 | ZFH3 | 0.071   | 0.037 |
| cg07464477 | chr16:73091565 | ZFH3 | 0.014   | 0.001 |
| cg03202064 | chr16:73091917 | ZFH3 | < 0.001 | 0.001 |
| cg07786668 | chr16:73092391 | ZFH3 | 0.093   | 0.009 |
| cg00614832 | chr16:73092394 | ZFH3 | 0.012   | 0.013 |
| cg21122147 | chr16:73092500 | ZFH3 | < 0.001 | 0.001 |
| cg26474270 | chr16:73092823 | ZFH3 | 0.167   | 0.003 |
| cg11804517 | chr16:73092997 | ZFH3 | 0.203   | 0.004 |
| cg02310882 | chr16:73093296 | ZFH3 | 0.465   | 0.011 |
| cg07996255 | chr16:73093309 | ZFH3 | 0.357   | 0.005 |
| cg20213863 | chr16:73093470 | ZFH3 | 0.461   | 0.014 |
| cg13416486 | chr16:73093652 | ZFH3 | 0.869   | 0.007 |

Notes: CpG ID corresponds to the unique CpG site identifier in the HumanMethylationEPIC array (Illumina). Chromosomal location denoted according human reference assembly GRCh37/hg19. All depicted P values are FDR adjusted P values. CpG-sites with an absolute mean methylation beta value difference > 0.15 and FDR adjusted P value < 0.05 were considered statistically significant.

\*Included studies:

Buda P, Chyb M, Smorzewska-Kiljan A, et al. Association Between rs12037447, rs146732504, rs151078858, rs55723436, and rs6094136 Polymorphisms and Kawasaki Disease in the Population of Polish Children. *Front Pediatr* 2021; **9**: 624798.

Burgner D, Davila S, Breunis WB, et al. A genome-wide association study identifies novel and functionally related susceptibility Loci for Kawasaki disease. *PLoS Genet* 2009; **5**(1): e1000319.

Hoggart C, Shimizu C, Galassini R, et al. Identification of novel locus associated with coronary artery aneurysms and validation of loci for susceptibility to Kawasaki disease. *Eur J Hum Genet* 2021; **29**(12):1734–1744.

Johnson TA, Mashimo Y, Wu JY, et al. Association of an IGHV3-66 gene variant with Kawasaki disease. *J Hum Genet* 2021; **66**(5): 475–489.

Khor CC, Davila S, Breunis WB, et al. Genome-wide association study identifies FCGR2A as a susceptibility locus for Kawasaki disease. *Nat Genet* 2011; **43**(12): 1241–6.

Kim JJ, Hong YM, Sohn S, et al. A genome-wide association analysis reveals 1p31 and 2p13.3 as susceptibility loci for Kawasaki disease. *Hum Genet* 2011; **129**(5): 487–95.

Kim JJ, Park YM, Yoon D, et al. Identification of KCNN2 as a susceptibility locus for coronary artery aneurysms in Kawasaki disease using genome-wide association analysis. *J Hum Genet* 2013; **58**(8): 521–5.

Kuo HC, Li SC, Guo MM, et al. Genome-Wide Association Study Identifies Novel Susceptibility Genes Associated with Coronary Artery Aneurysm Formation in Kawasaki Disease. *PLoS One* 2016; **11**(5): e0154943.

Kwon YC, Kim JJ, Yu JJ, et al. Identification of the TIFAB Gene as a Susceptibility Locus for Coronary Artery Aneurysm in Patients with Kawasaki Disease. *Pediatr Cardiol* 2019; **40**(3): 483–488.

Kwon YC, Kim JJ, Yun SW, et al. Male-specific association of the FCGR2A His167Arg polymorphism with Kawasaki disease. *PLoS One* 2017; **12**(9): e0184248.

Lee YC, Kuo HC, Chang JS, et al. Two new susceptibility loci for Kawasaki disease identified through genome-wide association analysis. *Nat Genet* 2012; **44**(5): 522–5.

Onouchi Y, Ozaki K, Burns JC, et al. A genome-wide association study identifies three new risk loci for Kawasaki disease. *Nat Genet* 2012; **44**(5): 517–21.

Tsai FJ, Lee YC, Chang JS, et al. Identification of novel susceptibility Loci for kawasaki disease in a Han chinese population by a genome-wide association study. *PLoS One* 2011; **6**(2):e16853.

## **Supplementary Methods**

### **Study protocol**

Whole blood samples and clinical data from 43 MIS-C patients were retrospectively collected between April 16<sup>th</sup>, 2020 and August 17<sup>th</sup>, 2021 in seven Hospitals in Spain organized into collaborative groups. Whole blood samples were also obtained from 15 pediatric COVID-19 cases with no evidence of MIS-C, and from 69 healthy children and adolescents collected during the pre-COVID-19 era (before December 2019). Approvals were obtained by the corresponding Ethical Committees (PR052/21, Hospital Universitari de Bellvitge; PR(AMI)388/2016, Hospital Universitari Vall d'Hebron; PI\_2020/35, Complejo Hospitalario de Navarra; CEIm 2314, Hospital Universitario de Burgos; PI-21-160, Hospital Universitari Germans Trias i Pujol). According to the Biomedical Research Law 14/2007, informed consents were signed to donate biological material for research purposes at the reference center. Clinical information has been collected, processed and stored under confidentiality policies, in accordance with the National Organic Law 3/2018, on the protection of personal data and guarantee of digital rights. Clinical data and biological samples arrived at our institution pseudonymized (de-identified) by the clinician or personnel authorized at the healthcare institution. Sensitive patient information showing the identity of the patient was only recorded at the healthcare institution. Biological samples were systematically collected and appropriately preserved for research studies. To this end, peripheral blood samples were drawn in EDTA Vacutainer® blood collection tubes and stored at - 80°C until DNA extraction.

### **DNA methylation data**

The DNA methylation status of the studied samples was obtained using the Infinium MethylationEPIC Array (~850,000 CpG sites), following the manufacturer's instructions for the automated processing of arrays with a liquid handler (Illumina Infinium HD Methylation Assay Experienced User Card, Automated Protocol 15019521 v01) (Moran et al., 2016). DNA methylation beta values were obtained from the raw IDAT files using the minfi package (v1.36.0) in R. Briefly, the pre-processing of the methylation data performed with the minfi package in R involved removal of erratic probe signals such as failed probes (probes with a detection value of  $P > 0.01$ ), cross-reacting probes and probes that overlapped SNPs within  $\pm 1$  base pair of CpG sites. Those probes that failed in more than 10% of samples were removed from the analysis, whereas the beta value of the probes that failed in less than 10% of samples was imputed using the median. XY chromosome probes were also removed. Finally, background correction and dye-based normalization were performed using ssNoob algorithm. The genomic analysis presented in the study was performed using the GRCh37 – hg19 human genome reference build, as described in the Illumina manifest file associated with the DNA methylation EPIC microarray.

## **Computational analyses**

The MIS-C epigenetic signature, referred to hereafter as EPIMISC, was obtained by first identifying the probes differentially methylated between MIS-C cases and healthy control donors, filtering out in a second step those probes found to be differentially methylated between pediatric COVID-19 cases and healthy controls (**Figure S1**). This approach enabled us to effectively discover the differentially methylated probes between MIS-C and non-MIS-C cases. This involved deriving a linear model adjusted by the age covariate with the limma R package (v3.46.0) using the methylation values of the discovery dataset. A significance threshold for CpGs with a False Discovery Rate (FDR) adjusted P value  $< 0.05$  and an absolute mean methylation beta difference between groups of  $> 0.15$  was established. The significantly differential DNA methylation sites (**Table S3**) were used to train a supervised classification model based on a ridge-regularized logistic regression to predict MIS-C diagnosis using the glmnet R package (v4.1-1). Thus, the methylation beta values of the differential DNA methylation sites (**Table S3**) are the predictors of the ridge-regularized logistic regression and the outcome is the presence or absence of the EPIMISC signature. The classification model was optimized by tuning parameters (best performance with  $\alpha = 0$  from ridge regression, and regularization parameter  $\lambda = 0.1$ ) after resampling with 10-fold cross-validation carried out three times using the caret package in R (v6.0-86). To this end, we used the createFolds caret function to generate balanced cross-validation groupings from the discovery dataset in order to perform the 10-fold cross-validation. Once the model and tuning parameters values have been defined after resampling, our model performance was assessed using the receiver operating characteristic (ROC) and calibration curves. In the next step, the classification model was tested in the validation cohort and a corresponding confusion matrix derived.

Likewise, a supervised classification model was trained and optimized with the same parameters as previously described, but this time using the differentially methylated CpGs present in the Infinium Human Methylation 450K BeadChip to test it in external datasets from the Gene Expression Omnibus (GEO) for which only 450K data were available. The performance of the 450K model was also assessed using the ROC curve of the resamples. Finally, hierarchical clustering analysis was performed using the Ward.D clustering method with Manhattan distances in the gplots (v3.1.1) package in R. All analyses were performed within the R statistical environment (v4.0.3).

## **Gene Set Enrichment analysis**

Gene set enrichment analysis was conducted using the Enrichr tool (Kuleshov et al., 2016) by performing hypergeometrical tests (one-tailed Fisher's exact test) using Gene Ontology

Biological Process gene set. Enrichments were considered significant at Benjamini & Hochberg False Discovery Rate (FDR) adjusted  $P < 0.05$ .

### **Cell type deconvolution analysis**

Cell type deconvolution analysis to calculate particular hematological cell populations based on blood-derived DNA methylation signatures (Salas et al., 2018) was performed using estimateCellCounts2 function from FlowSorted.Blood.EPIC (v1.8.0) package in R.

### **Statistical analyses**

The entire cohort (N=127) was divided into a discovery (N=85) and validation cohorts (N=42) using the createDataPartition function from the caret R package (v6.0-86). We used this function to create one hundred (66% discovery and 33% validation) disease status and age-balanced splits of the entire dataset, so that the random sampling occurred within each disease status (MIS-C vs non-MIS-C) and age category (age groups were defined by 5 years intervals), preserving the overall class distribution of the data. We randomly selected one of the 100 balanced splits to divide samples into discovery and validation cohorts. This was done to avoid disparity in the frequencies of the observed classes (disease status and age) that can have a significant negative impact on model fitting.

We estimated the power of our EPIC array DNA methylation study to demonstrate the hypotheses according to an epigenome-wide association study (EWAS) power calculation technique previously described (Mansell et al., 2019). Thus, we determined that 97.4% of sites in the EPIC array (~850,000 sites) have power >90% to detect a 10% mean methylation difference (effect size) with N=85 samples (our discovery cohort sample size) at a significance threshold of  $P < 0.0001$ .

Principal component analysis (PCA) was performed using PCAtools R package (v2.2.0) as an unsupervised method for data exploration in order to detect the greatest sources of variation in our dataset. We explored all the clinical variables available (**Table 1**) and found that disease status and age were the two main sources of variation in our dataset. Thus, we adjusted our analysis by age to correct its confounding effect.

To assess whether the assumptions of linear regression are satisfied, we used the gvlma R package (v1.0.0.3) considering a significance threshold ( $P < 9.42 \times 10^{-8}$ ) previously described for the EPIC array (Mansell et al., 2019). As a result, 99.99% of sites in the EPIC array fulfill the linearity assumption (linear relationship between independent variables (both disease status and age) and dependent variable (CpG site methylation beta value)), 98.9% of sites

show homoscedasticity (constant variance of the residuals), 90.63% of sites present a symmetrical normal distribution of the residuals and 86.21% present a bell-shaped normal distribution of the residuals. Finally, a global test was performed providing an omnibus test of the four individual statistical tests, showing that 83.24% of sites in the EPIC array fulfill all linearity assumptions.

Furthermore, the differential methylation analysis between MIS-C and non-MIS-C cases was applied to beta values employing an empirical Bayesian framework linear model from the limma R package (v3.46.0), a model suitable for DNA methylation data (Mansell et al., 2019). limma operates on a matrix of methylation values, where each row is a probe (EPIC array site) and each column corresponds to a sample, and it fits a linear model to each row of data (Ritchie et al., 2015). For each probe, we have a vector of DNA methylation values and a design matrix that relates these values to some coefficients of interest (disease status and age). Thus, the dependent variable in the linear model is the methylation value and the independent variables are disease status and age.

## References

- Kuleshov MV, Jones MR, Rouillard AD, et al. Enrichr: a comprehensive gene set enrichment analysis web server 2016 update. *Nucleic Acids Research* 2016; **44** (W1): W90–7.
- Mansell G, Gorrie-Stone TJ, Bao Y, et al. Guidance for DNA methylation studies: statistical insights from the Illumina EPIC array. *BMC Genomics* 2019; **20**: 366.
- Moran S, Arribas C, Esteller M. Validation of a DNA methylation microarray for 850,000 CpG sites of the human genome enriched in enhancer sequences. *Epigenomics* 2016 Mar;**8**(3): 389–99.
- Ritchie ME, Phipson B, Wu D, Hu Y, Law CW, Shi W, et al. limma powers differential expression analyses for RNA-seq and microarray studies. *Nucleic Acids Res* 2015 Apr 20; **43**(7): e47.
- Salas LA, Koestler DC, Butler RA, Hansen HM, Wiencke JK, Kelsey KT, Christensen BC. An optimized library for reference-based deconvolution of whole-blood biospecimens assayed using the Illumina HumanMethylationEPIC BeadArray. *Genome Biol* 2018; **19**: 64.

## References of genetic loci associated to COVID-19 included in the study

1. Bastard P, Rosen LB, Zhang Q, et al. Autoantibodies against type I IFNs in patients with life-threatening COVID-19. *Science* 2020; **370**: eabd4585.
2. Mousa M, Vurivi H, Kannout H, et al. Genome-wide association study of hospitalized COVID-19 patients in the United Arab Emirates. *EBioMedicine* 2021; **74**: 103695.
3. Pairo-Castineira E, Clohisey S, Klaric L, et al. Genetic mechanisms of critical illness in Covid-19. *Nature* 2020; **591**: 92–98.
4. Severe Covid-19 GWAS Group, Ellinghaus D, Degenhardt F, et al. Genomewide association study of severe Covid-19 with respiratory failure. *N Engl J Med* 2020; **383**: 1522–34.
5. Singh H, Choudhari R, Nema V, Khan AA. ACE2 and TMPRSS2 polymorphisms in various diseases with special reference to its impact on COVID-19 disease. *Microb Pathog* 2020; **150**: 104621.

6. van der Made CI, Simons A, Schuurs-Hoeijmakers J, et al. Presence of genetic variants among young men with severe COVID-19. *JAMA* 2020; **324**: 1–11.
7. Zhang Q, Bastard P, Liu Z, et al. Inborn errors of type I IFN immunity in patients with life-threatening COVID-19. *Science* 2020; **370**: eabd4570.

### References of genetic loci associated to MIS-C included in the study

1. Chou J, Platt CD, Habiballah S, et al. Mechanisms underlying genetic susceptibility to multisystem inflammatory syndrome in children (MIS-C). *J Allergy Clin Immunol* 2021; **148**(3): 732–738.e1.
2. Lee PY, Platt CD, Weeks S, et al. Immune dysregulation and multisystem inflammatory syndrome in children (MIS-C) in individuals with haploinsufficiency of SOCS1. *J Allergy Clin Immunol* 2020; **146**(5): 1194–1200.e1.

### References of genetic loci associated to Kawasaki disease included in the study

1. Buda P, Chyb M, Smorzewska-Kiljan A, et al. Association Between rs12037447, rs146732504, rs151078858, rs55723436, and rs6094136 Polymorphisms and Kawasaki Disease in the Population of Polish Children. *Front Pediatr* 2021; **9**: 624798.
2. Burgner D, Davila S, Breunis WB, et al. A genome-wide association study identifies novel and functionally related susceptibility Loci for Kawasaki disease. *PLoS Genet* 2009; **5**(1): e1000319.
3. Hoggart C, Shimizu C, Galassini R, et al. Identification of novel locus associated with coronary artery aneurysms and validation of loci for susceptibility to Kawasaki disease. *Eur J Hum Genet* 2021; **29**(12): 1734-1744.
4. Johnson TA, Mashimo Y, Wu JY, et al. Association of an IGHV3-66 gene variant with Kawasaki disease. *J Hum Genet* 2021; **66**(5): 475-489.
5. Khor CC, Davila S, Breunis WB, et al. Genome-wide association study identifies FCGR2A as a susceptibility locus for Kawasaki disease. *Nat Genet* 2011; **43**(12): 1241-6.
6. Kim JJ, Hong YM, Sohn S, et al. A genome-wide association analysis reveals 1p31 and 2p13.3 as susceptibility loci for Kawasaki disease. *Hum Genet* 2011; **129**(5): 487-95.
7. Kim JJ, Park YM, Yoon D, et al. Identification of KCNN2 as a susceptibility locus for coronary artery aneurysms in Kawasaki disease using genome-wide association analysis. *J Hum Genet.* 2013; **58**(8): 521-5.
8. Kuo HC, Li SC, Guo MM, et al. Genome-Wide Association Study Identifies Novel Susceptibility Genes Associated with Coronary Artery Aneurysm Formation in Kawasaki Disease. *PLoS One* 2016; **11**(5): e0154943.
9. Kwon YC, Kim JJ, Yu JJ, et al. Identification of the TIFAB Gene as a Susceptibility Locus for Coronary Artery Aneurysm in Patients with Kawasaki Disease. *Pediatr Cardiol* 2019; **40**(3): 483-488.
10. Kwon YC, Kim JJ, Yun SW, et al. Male-specific association of the FCGR2A His167Arg polymorphism with Kawasaki disease. *PLoS One* 2017; **12**(9): e0184248.
11. Lee YC, Kuo HC, Chang JS, et al. Two new susceptibility loci for Kawasaki disease identified through genome-wide association analysis. *Nat Genet* 2012; **44**(5): 522-5.
12. Onouchi Y, Ozaki K, Burns JC, et al. A genome-wide association study identifies three new risk loci for Kawasaki disease. *Nat Genet* 2012; **44**(5): 517-21.
13. Tsai FJ, Lee YC, Chang JS, et al. Identification of novel susceptibility Loci for kawasaki disease in a Han chinese population by a genome-wide association study. *PLoS One* 2011; **6**(2): e16853.
